# Supplementary material for: An orphan two-component response regulator Slr1588 involves salt tolerance by directly regulating synthesis of compatible solutes in photosynthetic Synechocystis sp. PCC 6803
Source: Royal Society of Chemistry journal article supplement (doi:10.1039/c4mb00095a), 2014-03-24
Supplement: c4mb00095a1.pdf [file c4mb00095a1.pdf]

## Supplementary Table S1: Primers used in this study.

### For mutant construction

| Primer ID  | Primer Sequences (5'-3')                          |
|------------|---------------------------------------------------|
| Km-F2      | AGCGAGGTATGTAGGCCGGTGCT                           |
| Km-R2      | GGAAATGTGCGCGGAACCCCT                             |
| slr1588-F1 | GCCACCATTGCACTGCCTTGT                             |
| slr1588-R1 | ACTCTGTAGCACCGCCTACATACCTCGCTAGGGATTAATCAAATCTTTG |
| slr1588-F3 | AAACAAATAGGGGTTCCGCGCACATTTCCCAGTTCAGTCAAGATGCGAA |
| slr1588-R3 | CGCTCCCGCCACGTCGAAT                               |

### For operon confirmation

| Primer ID      | Primer Sequences (5'-3') |
|----------------|--------------------------|
| Primer set 1-F | TTTTAGTGCTCGCCAAGCG      |
| Primer set 1-R | CTGCTTAAACGCCGCTACAT     |
| Primer set 2-F | TGACCAGGTGGAAGCTATGAC    |
| Primer set 2-R | TTCTGTACCGGCAGGAGTTT     |
| Primer set 3-F | TTGAGGACGGGGAGTTTTTAGT   |
| Primer set 3-R | TCATCCATCAAAAACACAGAGGG  |

### For RT-PCR

| Gene ID        | Primer Sequences (5'-3')                             |
|----------------|------------------------------------------------------|
| <i>6803s01</i> | GTGAGGACAGTGCCACAGAA<br>GGCAGGAAAAAGACCAACCT         |
| <i>slr0746</i> | GCCTGGATGCCGATTATGTC<br>CACGTGCTCCCCATTGGT           |
| <i>slr0747</i> | GCCCCGAAAGAAATCAGTAAA<br>CACCTGGTCATGGGTAAACGTAA     |
| <i>sll1566</i> | AGACGGGTTGTGGTAGACCAA<br>AACGCAACTGGGTGGTGAGT        |
| <i>sll1085</i> | TCCCTGGTTGGGTAAATATCTGA<br>AACCCTGTGAGGGAACCAT       |
| <i>sll0045</i> | GACCATTGACCGTTACGATCTCT<br>GGCGAAACAAAGCATAACATC     |
| <i>slr0952</i> | TGCCCCATTGGTCGCTAT<br>TGAGGTTAATGTCCACGTTGGA         |
| <i>slr0953</i> | CCCATGGAAAATTAGCTATCATCTC<br>CCTTCAACATCTCCGTAAATTGG |

### For His<sub>6</sub>-Slr1588 overexpression and EMSAs

| Primer ID      | Primer Sequences (5'-3')               |
|----------------|----------------------------------------|
| His6-slr1588-F | GACGACGACAAGATGAGTACTATTTTAGTTGTCGAGGA |
| His6-slr1588-R | GAGGAGAAGCCCGGTCAGCGCCGTAGGGGCAAATAG   |
| slr0746-F      | AGCCAGTGGCGATAAGTCCTATTTTGCCCCCTACGGC  |
| slr0746-R      | AGCCAGTGGCGATAAGCGAGGGAGAAACGTTGTTGG   |
| slr0747-F      | AGCCAGTGGCGATAAGCAGCGCCGAAGAGTCCATT    |
| slr0747-R      | AGCCAGTGGCGATAAGCTGTTCAAAACTGACACTGGC  |
| sll1566-F      | AGCCAGTGGCGATAAGGCAGAAATCTTGCCAGAAAAGC |
| sll1566-R      | AGCCAGTGGCGATAAGGGTAAAGGATCAAAAGGATG   |
| sll0045-F      | AGCCAGTGGCGATAAGTCGGAACATTTGGGACGAAGA  |

sll0045-R AGCCAGTGGCGATAAGCCCGAATTAAACCATGGACAC  
sll1085-F AGCCAGTGGCGATAAGCCGATGTGGTACTGGGAGAG  
sll1085-R AGCCAGTGGCGATAAGATGGCTGGGTAATGCTCAA  
sll0689-F AGCCAGTGGCGATAAGGACGCCTTTCCAATCTTGAGC  
sll0689-R AGCCAGTGGCGATAAGGGAGGGAGCAATGGGTTCAT  
slr0953-F AGCCAGTGGCGATAAGATCAGCGACCACAAACAACG  
slr0953-R AGCCAGTGGCGATAAGAGCAATAACTGTTCGCATAGGA  
slr0952-F AGCCAGTGGCGATAAGGTTCGGCAAATCCGCCTGAA  
slr0952-R AGCCAGTGGCGATAAGGAATCTCACTAACGGTCATGGA

---

Supplementary Table S2: All proteomes detected in the proteomic study.

| Protein ID | Slr1588-r1 vs. Control-r1 | Slr1588-r1 vs. Control-r2 | Slr1588-r2 vs. Control-r1 | Slr1588-r2 vs. Control-r2 | Description                                                                                                            |
|------------|---------------------------|---------------------------|---------------------------|---------------------------|------------------------------------------------------------------------------------------------------------------------|
| SI0002     | 0.991                     | 0.829                     | 0.861                     | 0.642                     | penicillin-binding protein                                                                                             |
| SI0005     | 1.486                     | 2.252                     | 1.230                     | 1.776                     | hypothetical protein                                                                                                   |
| SI0006     | 0.746                     | 0.918                     | 0.709                     | 0.850                     | putative aminotransferase                                                                                              |
| SI0007     | 0.847                     | 0.954                     | 0.623                     | 0.678                     | hypothetical protein                                                                                                   |
| SI0008     | 0.930                     | 1.010                     | 0.909                     | 1.027                     | unknown protein                                                                                                        |
| SI0016     | 0.868                     | 1.236                     | 0.636                     | 1.318                     | probable membrane-bound lytic transglycosylase A                                                                       |
| SI0017     | 0.873                     | 1.056                     | 0.912                     | 1.131                     | glutamate-1-semialdehyde aminomutase                                                                                   |
| SI0017     | 0.873                     | 1.056                     | 0.912                     | 1.131                     | glutamate-1-semialdehyde aminomutase                                                                                   |
| SI0018     | 1.391                     | 1.698                     | 1.325                     | 1.524                     | fructose-bisphosphate aldolase, class II                                                                               |
| SI0019     | 1.020                     | 1.015                     | 1.342                     | 1.304                     | 1-deoxy-d-xylulose 5-phosphate reductoisomerase                                                                        |
| SI0020     | 1.117                     | 1.389                     | 1.144                     | 1.333                     | ATP-dependent Clp protease ATPase subunit                                                                              |
| SI0021     | 0.693                     | 0.801                     | 1.052                     | 0.980                     | probable exonuclease                                                                                                   |
| SI0023     | 0.520                     | 0.542                     | 0.769                     | 0.606                     | hypothetical protein                                                                                                   |
| SI0030     | 0.009                     |                           | 0.004                     |                           | cmp operon transcriptional regulator, LysR family protein                                                              |
| SI0033     | 0.962                     | 1.024                     | 1.776                     | 1.953                     | carotene isomerase                                                                                                     |
| SI0034     | 1.093                     | 1.789                     | 0.859                     | 1.325                     | putative carboxypeptidase                                                                                              |
| SI0036     | 0.798                     | 1.155                     | 0.684                     | 1.024                     | hypothetical protein                                                                                                   |
| SI0037     | 0.826                     | 0.557                     | 0.491                     | 0.304                     | hypothetical protein                                                                                                   |
| SI0038     | 0.838                     | 0.845                     | 1.015                     | 0.923                     | positive phototaxis protein, two-component response regulator PatA subfamily                                           |
| SI0039     | 0.858                     | 0.733                     | 1.572                     | 1.406                     | positive phototaxis protein, two-component response regulator CheY subfamily                                           |
| SI0040     | 1.340                     | 0.987                     | 1.043                     | 0.758                     | positive phototaxis protein, homologous to chemotaxis protein CheW                                                     |
| SI0041     | 0.797                     | 0.613                     | 0.955                     | 0.639                     | phytochrome-like photoreceptor protein for positive phototaxis                                                         |
| SI0042     | 0.876                     | 0.750                     | 0.806                     | 0.611                     | methyl-accepting chemotaxis protein for positive phototaxis                                                            |
| SI0043     | 0.747                     | 0.530                     | 0.846                     | 0.750                     | homologous to chemotaxis protein CheA, two-component hybrid histidine kinase                                           |
| SI0044     | 0.686                     | 0.415                     | 0.487                     | 0.378                     | unknown protein                                                                                                        |
| SI0045     | 1.686                     | 3.774                     | 0.934                     | 1.529                     | sucrose phosphate synthase                                                                                             |
| SI0048     | 0.746                     | 0.727                     | 1.134                     | 1.089                     | unknown protein                                                                                                        |
| SI0051     | 1.429                     | 1.314                     | 1.172                     | 1.101                     | hypothetical protein                                                                                                   |
| SI0053     | 0.717                     | 0.812                     | 0.977                     | 1.124                     | biotin carboxylase                                                                                                     |
| SI0055     | 1.242                     | 1.681                     | 1.374                     | 1.815                     | processing protease                                                                                                    |
| SI0057     | 0.996                     | 1.057                     | 0.658                     | 0.694                     | heat shock protein GrpE                                                                                                |
| SI0058     | 0.714                     | 0.647                     | 0.782                     | 0.622                     | DnaK protein 1, heat shock protein 70, molecular chaperone                                                             |
| SI0063     | 1.036                     | 1.325                     | 0.573                     | 0.770                     | hypothetical protein                                                                                                   |
| SI0064     | 2.179                     | 1.898                     | 1.538                     | 1.783                     | periplasmic protein, putative polar amino acid transport system substrate-binding protein                              |
| SI0065     | 0.880                     | 1.135                     | 0.681                     | 0.775                     | acetolactate synthase small subunit                                                                                    |
| SI0066     | 0.913                     | 0.907                     | 0.968                     | 1.017                     | unknown protein                                                                                                        |
| SI0067     | 0.794                     | 1.059                     | 0.682                     | 0.810                     | glutathione S-transferase                                                                                              |
| SI0068     | 0.519                     | 0.450                     | 1.028                     | 0.858                     | unknown protein                                                                                                        |
| SI0069     | 0.717                     | 0.799                     | 0.641                     | 0.734                     | hypothetical protein                                                                                                   |
| SI0070     | 0.818                     | 0.833                     | 0.797                     | 0.785                     | phosphoribosylglycinamide formyltransferase                                                                            |
| SI0071     | 0.964                     | 1.319                     | 1.359                     | 1.795                     | hypothetical protein                                                                                                   |
| SI0072     | 0.605                     | 0.424                     | 0.636                     | 0.523                     | hypothetical protein                                                                                                   |
| SI0078     | 0.955                     | 1.332                     | 0.959                     | 1.167                     | threonyl-tRNA synthetase                                                                                               |
| SI0080     | 0.856                     | 1.054                     | 0.650                     | 0.791                     | N-acetyl-gamma-glutamyl-phosphate reductase                                                                            |
| SI0085     | 0.881                     | 1.515                     | 1.186                     | 1.171                     | unknown protein                                                                                                        |
| SI0086     | 0.906                     | 1.199                     | 0.794                     | 1.035                     | putative arsenical pump-driving ATPase                                                                                 |
| SI0088     | 1.120                     | 0.841                     | 0.614                     | 0.372                     | hypothetical protein                                                                                                   |
| SI0094     | 0.835                     | 0.965                     | 0.639                     | 0.764                     | two-component sensor histidine kinase                                                                                  |
| SI0096     | 1.225                     | 1.161                     | 1.016                     | 0.888                     | hypothetical protein                                                                                                   |
| SI0098     | 1.001                     | 0.821                     | 1.289                     | 1.119                     | hypothetical protein                                                                                                   |
| SI0100     | 0.934                     | 0.697                     | 0.696                     | 0.724                     | N-acyl-L-amino acid amidohydrolase                                                                                     |
| SI0102     | 1.024                     | 1.052                     | 1.225                     | 1.425                     | hypothetical protein                                                                                                   |
| SI0103     | 0.922                     | 1.024                     | 0.808                     | 0.809                     | hypothetical protein                                                                                                   |
| SI0108     | 1.190                     | 0.931                     | 1.312                     | 1.174                     | ammonium/methylammonium permease                                                                                       |
| SI0109     | 1.658                     | 0.695                     | 1.623                     | 0.761                     | chorismate mutase                                                                                                      |
| SI0135     | 1.309                     | 1.637                     | 1.309                     | 1.724                     | putative 5-methylthioadenosine phosphorylase                                                                           |
| SI0136     | 0.962                     | 1.346                     | 1.089                     | 1.613                     | aminopeptidase P                                                                                                       |
| SI0141     | 1.100                     | 0.890                     | 0.976                     | 0.780                     | hypothetical protein                                                                                                   |
| SI0142     | 0.890                     | 0.671                     | 0.802                     | 0.604                     | probable cation efflux system protein                                                                                  |
| SI0144     | 0.876                     | 0.977                     | 0.753                     | 0.872                     | uridine monophosphate kinase                                                                                           |
| SI0145     | 1.093                     | 1.203                     | 1.089                     | 1.280                     | ribosome releasing factor                                                                                              |
| SI0147     | 0.920                     | 0.885                     | 0.936                     | 0.940                     | hypothetical protein                                                                                                   |
| SI0148     | 1.064                     | 0.964                     | 1.362                     | 1.215                     | hypothetical protein                                                                                                   |
| SI0149     | 1.115                     | 1.175                     | 1.531                     | 1.773                     | hypothetical protein                                                                                                   |
| SI0154     | 0.903                     | 1.280                     | 1.064                     | 1.175                     | hypothetical protein                                                                                                   |
| SI0157     | 1.397                     | 2.315                     | 1.453                     | 2.421                     | hypothetical protein                                                                                                   |
| SI0158     | 1.046                     | 1.332                     | 0.870                     | 1.072                     | 1,4-alpha-glucan branching enzyme                                                                                      |
| SI0160     | 1.381                     | 1.103                     | 0.870                     | 0.686                     | hypothetical protein                                                                                                   |
| SI0162     | 0.941                     | 0.868                     | 1.274                     | 1.376                     | hypothetical protein                                                                                                   |
| SI0163     | 0.780                     | 0.736                     | 1.147                     | 0.957                     | WD-repeat protein                                                                                                      |
| SI0166     | 0.903                     | 0.978                     | 1.927                     | 1.905                     | a fusion protein between uroporphyrinogen-III C-methyltransferase (CobA/CorA) and uroporphyrinogen-III synthase (HemD) |
| SI0167     | 0.735                     | 0.992                     | 1.220                     | 1.285                     | unknown protein                                                                                                        |
| SI0169     | 0.816                     | 0.777                     | 0.843                     | 1.074                     | cell division protein Fm2 homolog                                                                                      |
| SI0170     | 1.055                     | 1.351                     | 0.606                     | 0.762                     | DnaK protein 2, heat shock protein 70, molecular chaperone                                                             |
| SI0171     | 1.008                     | 0.982                     | 1.188                     | 1.076                     | probable aminomethyltransferase                                                                                        |
| SI0171     | 1.008                     | 0.982                     | 1.188                     | 1.076                     | probable aminomethyltransferase                                                                                        |
| SI0172     | 0.886                     | 0.950                     | 0.699                     | 0.792                     | periplasmic protein, function unknown                                                                                  |
| SI0173     | 0.812                     | 0.802                     | 0.687                     | 0.762                     | virginiamycin B hydrolase, periplasmic protein                                                                         |
| SI0175     | 1.047                     | 1.605                     | 1.060                     | 1.536                     | hypothetical protein                                                                                                   |
| SI0176     | 0.739                     | 0.796                     | 0.792                     | 0.694                     | hypothetical protein                                                                                                   |
| SI0178     | 1.049                     | 1.189                     | 1.066                     | 1.305                     | hypothetical protein                                                                                                   |
| SI0179     | 0.992                     | 1.041                     | 0.798                     | 0.887                     | glutamyl-tRNA synthetase                                                                                               |
| SI0180     | 0.890                     | 0.829                     | 0.743                     | 0.683                     | hypothetical protein                                                                                                   |
| SI0182     | 1.082                     | 0.891                     | 0.728                     | 0.602                     | ABC transporter ATP-binding protein                                                                                    |
| SI0183     | 0.941                     | 0.861                     | 1.010                     | 0.978                     | hypothetical protein                                                                                                   |
| SI0184     | 1.012                     | 1.739                     | 1.135                     | 1.786                     | group2 RNA polymerase sigma factor SigC                                                                                |
| SI0185     | 0.842                     | 0.983                     | 0.772                     | 0.979                     | hypothetical protein                                                                                                   |
| SI0188     | 0.983                     | 0.755                     | 1.236                     | 0.894                     | unknown protein                                                                                                        |
| SI0191     | 1.484                     | 0.893                     | 1.742                     | 1.035                     | unknown protein                                                                                                        |
| SI0192     | 1.381                     | 0.725                     | 0.720                     | 0.373                     | hypothetical protein                                                                                                   |
| SI0195     | 0.896                     | 1.890                     | 1.486                     | 1.949                     | probable ATP-dependent protease                                                                                        |
| SI0195     | 0.896                     | 1.890                     | 1.486                     | 1.949                     | probable ATP-dependent protease                                                                                        |
| SI0199     | 1.368                     | 1.395                     | 2.268                     | 2.415                     | plastocyanin                                                                                                           |
| SI0202     | 0.983                     | 1.009                     | 1.250                     | 1.267                     | glucose inhibited division protein                                                                                     |
| SI0204     | 0.879                     | 1.093                     | 0.907                     | 0.945                     | glucose inhibited division protein                                                                                     |
| SI0207     | 1.143                     | 1.712                     | 0.878                     | 1.029                     | glucose-1-phosphate thymidyltransferase                                                                                |
| SI0208     | 1.629                     | 1.802                     | 1.119                     | 0.891                     | hypothetical protein                                                                                                   |
| SI0209     | 1.188                     | 0.977                     | 1.949                     | 1.585                     | hypothetical protein                                                                                                   |
| SI0216     | 1.110                     | 1.316                     | 1.114                     | 1.362                     | hypothetical protein                                                                                                   |
| SI0220     | 1.052                     | 1.314                     | 0.935                     | 1.285                     | L-glutamine:D-fructose-6-P amidotransferase                                                                            |
| SI0221     | 1.064                     | 1.136                     | 1.692                     | 1.786                     | bacterioferritin comigratory protein                                                                                   |
| SI0222     | 0.824                     | 0.742                     | 0.863                     | 0.861                     | putative purple acid phosphatase                                                                                       |
| SI0223     | 1.041                     | 0.799                     | 0.789                     | 0.402                     | NADH dehydrogenase subunit 2                                                                                           |
| SI0223     | 1.041                     | 0.799                     | 0.789                     | 0.402                     | NADH dehydrogenase subunit 2                                                                                           |
| SI0224     | 1.577                     | 1.314                     | 0.963                     | 0.784                     | amino-acid ABC transporter binding protein                                                                             |
| SI0226     | 1.032                     | 1.309                     | 1.595                     | 1.590                     | photosystem I assembly related protein                                                                                 |
| SI0227     | 1.065                     | 1.208                     | 0.953                     | 1.049                     | peptidyl-prolyl cis-trans isomerase B, periplasmic protein                                                             |
| SI0228     | 0.829                     | 0.868                     | 0.915                     | 0.799                     | arginase                                                                                                               |
| SI0230     | 1.185                     | 0.649                     | 0.453                     | 0.324                     | hypothetical protein                                                                                                   |
| SI0236     | 0.892                     | 0.876                     | 0.691                     | 0.661                     | unknown protein                                                                                                        |
| SI0237     | 0.979                     | 1.357                     | 0.694                     | 0.951                     | unknown protein                                                                                                        |
| SI0243     | 1.082                     |                           | 1.441                     |                           | unknown protein                                                                                                        |
| SI0244     | 1.105                     | 1.003                     | 0.765                     | 0.752                     | UDP-glucose 4-epimerase                                                                                                |
| SI0245     | 1.022                     | 1.153                     | 1.122                     | 1.242                     | probable GTP binding protein                                                                                           |
| SI0247     | 1.002                     | 1.079                     | 0.092                     | 0.069                     | iron-stress chlorophyll-binding protein, homologous to psbC (CP43)                                                     |
| SI0248     | 0.362                     | 0.208                     | 0.310                     | 0.170                     | flavodoxin                                                                                                             |
| SI0250     | 0.891                     | 1.418                     | 0.684                     | 0.988                     | pantothenate metabolism flavoprotein                                                                                   |

|        |       |       |       |       |                                                                       |
|--------|-------|-------|-------|-------|-----------------------------------------------------------------------|
| SI0253 | 0.486 | 0.300 | 0.887 | 0.388 | hypothetical protein                                                  |
| SI0254 | 0.741 | 1.127 | 0.950 | 1.613 | probable phytoene dehydrogenase Rieske iron-sulfur component          |
| SI0258 | 0.974 | 0.732 | 1.497 | 1.159 | cytochrome c550                                                       |
| SI0260 | 1.057 | 1.163 | 0.895 | 0.869 | hypothetical protein                                                  |
| SI0263 | 0.529 | 0.931 | 0.578 | 0.558 | unknown protein                                                       |
| SI0267 | 0.546 | 0.749 | 0.632 | 0.622 | unknown protein                                                       |
| SI0268 |       |       | 0.535 | 0.590 | hypothetical protein                                                  |
| SI0270 | 0.942 | 1.199 | 0.754 | 1.096 | primosomal protein N'                                                 |
| SI0271 | 1.083 | 0.988 | 1.179 | 0.885 | N utilization substance protein B homolog                             |
| SI0272 | 1.168 | 1.255 | 0.725 | 0.849 | hypothetical protein                                                  |
| SI0273 | 1.383 | 1.587 | 1.342 | 1.468 | Na <sup>+</sup> /H <sup>+</sup> antiporter                            |
| SI0274 | 1.081 | 0.960 | 1.215 | 1.160 | hypothetical protein                                                  |
| SI0281 | 0.539 | 0.729 | 0.626 | 0.806 | unknown protein                                                       |
| SI0283 | 0.597 | 0.599 | 0.960 | 0.827 | hypothetical protein                                                  |
| SI0284 | 1.357 | 0.587 | 0.951 | 0.406 | hypothetical protein                                                  |
| SI0286 | 1.159 | 1.757 | 1.323 | 1.965 | hypothetical protein YCF52                                            |
| SI0288 | 0.850 | 1.832 | 0.605 | 1.232 | septum site-determining protein MinC                                  |
| SI0289 | 0.776 | 0.999 | 0.680 | 0.845 | septum site-determining protein MinD                                  |
| SI0290 | 0.946 | 0.962 | 0.832 | 0.847 | polyphosphate kinase                                                  |
| SI0293 | 1.040 | 1.684 | 0.890 | 1.292 | unknown protein                                                       |
| SI0295 | 0.834 | 1.205 | 1.277 | 1.821 | hypothetical protein                                                  |
| SI0300 | 0.791 | 0.792 | 0.741 | 0.733 | riboflavin synthase alpha chain                                       |
| SI0301 | 0.989 | 1.616 | 1.300 | 1.789 | hypothetical protein                                                  |
| SI0312 | 1.449 | 1.553 | 0.877 | 1.071 | probable oligopeptides ABC transporter permease protein               |
| SI0314 | 0.792 | 1.277 | 0.833 | 1.200 | periplasmic protein, function unknown                                 |
| SI0318 | 0.898 | 1.269 | 1.445 | 2.169 | hypothetical protein                                                  |
| SI0319 | 1.600 | 2.381 | 1.088 | 1.681 | periplasmic protein, function unknown                                 |
| SI0320 | 1.163 | 1.248 | 0.791 | 0.866 | probable ribonuclease D                                               |
| SI0321 | 1.157 | 1.353 | 1.050 | 1.198 | unknown protein                                                       |
| SI0325 | 1.439 | 2.058 | 1.096 | 1.695 | hypothetical protein                                                  |
| SI0329 | 1.229 | 1.629 | 0.858 | 1.126 | 6-phosphogluconate dehydrogenase                                      |
| SI0335 | 1.244 | 1.305 | 1.212 | 1.107 | hypothetical protein                                                  |
| SI0336 | 0.843 | 0.619 | 1.264 | 0.833 | acetyl-CoA carboxylase beta subunit                                   |
| SI0337 | 0.784 | 0.808 | 0.840 | 0.817 | phosphate sensor, two-component sensor histidine kinase               |
| SI0350 | 1.104 | 0.934 | 1.013 | 0.788 | hypothetical protein                                                  |
| SI0359 | 0.987 | 1.218 | 0.751 | 0.849 | hypothetical protein                                                  |
| SI0361 | 1.546 | 2.114 | 1.307 | 1.458 | hypothetical protein                                                  |
| SI0362 | 0.912 | 1.009 | 1.175 | 1.058 | alanyl-tRNA synthetase                                                |
| SI0368 | 1.017 | 1.754 | 1.332 | 2.273 | uracil phosphoribosyltransferase                                      |
| SI0370 | 1.000 | 1.217 | 1.098 | 1.359 | carbamoyl-phosphate synthase, pyrimidine-specific, large chain        |
| SI0373 | 1.080 | 1.247 | 1.080 | 1.208 | gamma-glutamyl phosphate reductase                                    |
| SI0374 | 0.944 | 1.114 | 1.035 | 1.156 | urea transport system ATP-binding protein                             |
| SI0376 | 1.264 | 0.830 | 1.704 | 1.135 | unknown protein                                                       |
| SI0377 | 0.864 | 1.025 | 1.037 | 1.401 | transcription-repair coupling factor                                  |
| SI0379 | 0.738 | 1.070 | 0.812 | 1.078 | acyl-[acyl-carrier-protein]-UDP-N-acetylglucosamine o-acyltransferase |
| SI0380 | 0.724 | 0.960 | 0.745 | 0.943 | probable glycosyltransferase                                          |
| SI0381 | 1.205 | 1.083 | 0.973 | 0.991 | hypothetical protein                                                  |
| SI0395 | 0.930 | 1.212 | 0.799 | 1.001 | phosphoglycerate mutase                                               |
| SI0396 | 0.731 | 0.743 | 0.715 | 0.599 | two-component response regulator OmpR subfamily                       |
| SI0400 | 0.748 | 0.708 | 0.712 | 0.608 | hypothetical protein                                                  |
| SI0401 | 0.939 | 0.756 | 0.955 | 0.891 | citrate synthase                                                      |
| SI0402 | 0.888 | 0.989 | 1.125 | 1.189 | aspartate aminotransferase                                            |
| SI0404 | 0.663 | 0.746 | 1.170 | 1.094 | glycolate oxidase subunit GlcD                                        |
| SI0406 | 0.946 | 1.182 | 0.735 | 0.771 | unknown protein                                                       |
| SI0408 | 0.968 | 0.930 | 0.805 | 0.733 | peptidyl-prolyl cis-trans isomerase                                   |
| SI0410 | 1.020 | 1.247 | 1.332 | 1.508 | hypothetical protein                                                  |
| SI0412 | 1.272 | 1.014 | 1.502 | 1.082 | hypothetical protein                                                  |
| SI0413 | 1.048 | 1.495 | 0.959 | 1.078 | hypothetical protein                                                  |
| SI0414 | 0.877 | 1.111 | 0.695 | 0.766 | hypothetical protein                                                  |
| SI0415 | 0.917 | 1.062 | 1.016 | 0.842 | ATP-binding protein of ABC transporter                                |
| SI0415 | 0.917 | 1.062 | 1.016 | 0.842 | ATP-binding protein of ABC transporter                                |
| SI0416 | 1.120 | 1.439 | 0.678 | 0.814 | 60 kDa chaperonin 2, GroEL2, molecular chaperone                      |
| SI0418 | 1.200 | 1.244 | 1.166 | 1.282 | 2-methyl-6-phytylbenzoquinone methyltransferase                       |
| SI0419 | 0.953 | 1.266 | 0.778 | 1.020 | unknown protein                                                       |
| SI0420 | 1.028 | 1.364 | 0.739 | 0.923 | urease beta subunit                                                   |
| SI0420 | 1.028 | 1.364 | 0.739 | 0.923 | urease beta subunit                                                   |
| SI0421 | 1.015 | 1.042 | 1.305 | 1.175 | adenylosuccinate lyase                                                |
| SI0422 | 0.899 | 0.710 | 0.773 | 0.661 | asparaginase                                                          |
| SI0424 | 1.059 | 1.225 | 1.425 | 1.427 | hypothetical protein                                                  |
| SI0427 | 0.929 | 0.876 | 1.582 | 1.464 | photosystem II manganese-stabilizing polypeptide                      |
| SI0430 | 1.284 | 2.247 | 0.769 | 1.374 | HtpG, heat shock protein 90, molecular chaperone                      |
| SI0441 | 1.277 | 1.302 | 1.946 | 2.049 | unknown protein                                                       |
| SI0443 | 1.109 | 1.297 | 0.695 | 0.857 | unknown protein                                                       |
| SI0445 | 0.779 | 0.491 | 1.198 | 0.745 | unknown protein                                                       |
| SI0446 | 0.687 | 0.588 | 1.078 | 0.805 | unknown protein                                                       |
| SI0454 | 0.928 | 0.756 | 0.867 | 0.760 | phenylalanyl-tRNA synthetase alpha chain                              |
| SI0455 | 1.202 | 1.311 | 1.107 | 1.193 | homoserine dehydrogenase                                              |
| SI0456 | 0.857 | 0.796 | 1.136 | 1.013 | hypothetical protein                                                  |
| SI0459 | 0.981 | 1.181 | 1.115 | 1.294 | excinuclease ABC subunit B                                            |
| SI0459 | 0.981 | 1.181 | 1.115 | 1.294 | excinuclease ABC subunit B                                            |
| SI0461 | 0.737 | 0.787 | 0.743 | 0.728 | gamma-glutamyl phosphate reductase                                    |
| SI0467 | 0.905 | 1.302 | 0.794 | 1.230 | S-adenosylmethionine:tRNA ribosyltransferase-isomerase                |
| SI0469 | 1.018 | 1.256 | 1.124 | 1.462 | ribose-phosphate pyrophosphokinase                                    |
| SI0470 | 0.719 | 1.028 | 1.081 | 1.418 | hypothetical protein                                                  |
| SI0471 | 1.538 | 1.408 | 1.139 | 1.086 | hypothetical protein                                                  |
| SI0477 | 0.615 | 0.570 | 0.931 | 1.034 | putative biopolymer transport ExbB-like protein                       |
| SI0480 | 1.079 | 1.272 | 1.134 | 1.353 | probable aminotransferase                                             |
| SI0480 | 1.079 | 1.272 | 1.134 | 1.353 | probable aminotransferase                                             |
| SI0482 | 1.653 | 0.829 | 0.611 | 0.302 | unknown protein                                                       |
| SI0485 | 0.778 | 0.649 | 0.469 | 0.387 | two-component response regulator NarL subfamily                       |
| SI0486 | 0.688 | 0.761 | 0.597 | 0.538 | circadian clock protein KaiB homolog                                  |
| SI0487 | 1.002 | 1.031 | 0.832 | 0.688 | hypothetical protein                                                  |
| SI0489 | 1.057 | 0.964 | 1.159 | 1.304 | ATP-binding protein of ABC transporter                                |
| SI0493 | 0.975 | 1.080 | 0.855 | 0.907 | hypothetical protein                                                  |
| SI0495 | 1.182 | 1.550 | 1.441 | 1.527 | asparaginyl-tRNA synthetase                                           |
| SI0497 | 1.013 | 0.832 | 0.833 | 0.699 | hypothetical protein                                                  |
| SI0498 | 1.192 | 1.558 | 1.026 | 1.876 | hypothetical protein                                                  |
| SI0499 | 0.865 | 1.009 | 0.550 | 0.515 | hypothetical protein                                                  |
| SI0501 | 0.758 | 0.808 | 1.018 | 0.954 | probable glycosyltransferase                                          |
| SI0502 | 1.015 | 1.335 | 1.082 | 1.326 | arginyl-tRNA-synthetase                                               |
| SI0504 | 1.042 | 0.890 | 1.669 | 1.366 | diaminopimelate decarboxylase                                         |
| SI0505 | 0.736 | 0.828 | 0.765 | 0.940 | hypothetical protein                                                  |
| SI0506 | 0.845 | 0.494 | 0.903 | 0.160 | undecaprenyl pyrophosphate synthetase                                 |
| SI0507 | 0.644 | 0.472 | 0.569 | 0.393 | probable cation transporter                                           |
| SI0508 | 0.835 | 0.938 | 0.293 | 0.426 | unknown protein                                                       |
| SI0509 | 0.974 | 1.063 | 0.860 | 0.937 | similar to 5',5''-P-1,P-4-tetraphosphate phosphorylase II             |
| SI0513 | 0.888 | 1.032 | 1.522 | 1.504 | hypothetical protein                                                  |
| SI0514 | 1.227 | 1.323 | 0.544 | 0.631 | hypothetical protein                                                  |
| SI0518 | 1.101 | 1.344 | 2.041 | 2.710 | unknown protein                                                       |
| SI0519 | 1.267 | 1.083 | 0.643 | 0.630 | NADH dehydrogenase subunit 1                                          |
| SI0520 | 1.330 | 1.195 | 0.883 | 0.791 | NADH dehydrogenase subunit NdhI                                       |
| SI0521 | 1.238 | 0.976 | 0.566 | 0.436 | NADH dehydrogenase subunit 6                                          |
| SI0524 | 0.998 | 1.147 | 1.000 | 1.203 | hypothetical protein                                                  |
| SI0525 | 1.357 | 1.592 | 0.668 | 0.779 | hypothetical protein                                                  |
| SI0528 | 1.139 | 1.047 | 0.712 | 0.741 | hypothetical protein                                                  |
| SI0529 | 0.958 | 0.879 | 0.922 | 0.826 | hypothetical protein                                                  |
| SI0533 | 1.335 | 1.582 | 1.942 | 2.232 | trigger factor                                                        |
| SI0534 | 1.075 | 1.116 | 1.050 | 1.063 | ATP-dependent Clp protease proteolytic subunit 2                      |
| SI0535 | 1.292 | 1.333 | 0.998 | 1.193 | ATP-dependent Clp protease ATPase subunit                             |
| SI0540 | 0.821 | 1.595 | 0.417 | 0.620 | phosphate-binding protein PstS homolog                                |
| SI0541 | 1.481 | 0.941 | 2.584 | 1.621 | acyl-lipid desaturase (delta 9)                                       |
| SI0542 | 0.838 | 0.623 | 1.279 | 0.912 | acetyl-coenzyme A synthetase                                          |
| SI0543 |       |       |       | 0.029 | hypothetical protein                                                  |
| SI0544 | 0.933 | 0.701 | 0.978 | 0.726 | hypothetical protein                                                  |

|        |       |       |       |       |                                                                                                      |
|--------|-------|-------|-------|-------|------------------------------------------------------------------------------------------------------|
| SI0545 | 0.407 | 0.215 | 0.565 | 0.294 | hypothetical protein                                                                                 |
| SI0546 | 0.950 | 1.095 | 1.437 | 1.818 | probable translation initiation factor                                                               |
| SI0547 | 0.554 | 0.564 | 0.672 | 0.675 | unknown protein                                                                                      |
| SI0550 | 1.370 | 1.294 | 1.838 | 1.645 | flavoprotein                                                                                         |
| SI0553 | 1.416 | 1.548 | 0.964 | 0.873 | hypothetical protein                                                                                 |
| SI0554 | 1.464 | 1.499 | 1.513 | 1.473 | ferredoxin-thioredoxin reductase, catalytic chain                                                    |
| SI0555 | 0.678 | 0.434 | 0.859 | 0.543 | methionine aminopeptidase                                                                            |
| SI0556 | 1.000 | 1.266 | 1.198 | 1.425 | Na <sup>+</sup> /H <sup>+</sup> antiporter                                                           |
| SI0558 | 0.880 | 0.990 | 1.064 | 1.294 | hypothetical protein YCF53                                                                           |
| SI0563 | 1.368 | 1.567 | 1.295 | 1.198 | unknown protein                                                                                      |
| SI0564 | 1.475 | 1.235 | 2.257 | 1.908 | hypothetical protein                                                                                 |
| SI0567 | 0.995 | 0.935 | 0.992 | 1.025 | ferric uptake regulation protein                                                                     |
| SI0569 | 0.648 | 1.046 | 1.129 | 1.590 | RecA gene product                                                                                    |
| SI0572 | 0.852 | 0.497 | 1.182 | 0.688 | hypothetical protein                                                                                 |
| SI0573 | 1.217 | 0.503 | 1.372 | 0.481 | carbamate kinase                                                                                     |
| SI0574 | 0.888 | 0.440 | 1.832 | 0.967 | probable permease protein of lipopolysaccharide ABC transporter                                      |
| SI0575 | 0.943 | 1.082 | 1.153 | 1.248 | probable lipopolysaccharide ABC transporter ATP binding subunit                                      |
| SI0576 | 0.834 | 1.050 | 0.816 | 0.950 | putative sugar-nucleotide epimerase/dehydratase                                                      |
| SI0577 | 0.903 | 1.070 | 1.256 | 1.504 | hypothetical protein                                                                                 |
| SI0578 | 1.066 | 1.060 | 1.346 | 1.376 | phosphoribosylaminoimidazole carboxylase ATPase subunit                                              |
| SI0585 | 0.997 | 1.138 | 0.661 | 0.591 | hypothetical protein                                                                                 |
| SI0586 | 0.687 | 0.486 | 0.952 | 0.665 | hypothetical protein                                                                                 |
| SI0587 | 0.898 | 1.087 | 0.675 | 0.879 | pyruvate kinase                                                                                      |
| SI0588 | 0.374 | 0.584 | 0.499 | 0.685 | unknown protein                                                                                      |
| SI0593 | 0.785 | 0.611 | 0.934 | 0.743 | glucokinase                                                                                          |
| SI0596 | 0.796 | 1.332 | 0.346 | 0.422 | hypothetical protein                                                                                 |
| SI0601 | 0.771 | 0.654 | 0.722 | 0.607 | nitrilase homolog                                                                                    |
| SI0602 | 0.814 | 0.722 | 1.072 | 0.953 | hypothetical protein                                                                                 |
| SI0603 | 0.726 | 0.741 | 0.954 | 0.962 | menaquinone biosynthesis protein MenD                                                                |
| SI0606 | 1.070 | 1.096 | 0.944 | 0.898 | hypothetical protein                                                                                 |
| SI0613 | 1.337 | 2.053 | 0.224 | 0.402 | Holliday junction DNA helicase RuvB                                                                  |
| SI0616 | 1.120 | 1.110 | 1.094 | 1.153 | preprotein translocase SecA subunit                                                                  |
| SI0617 | 1.022 | 0.834 | 0.936 | 0.641 | plasma membrane protein essential for thylakoid formation                                            |
| SI0622 | 0.959 | 0.567 | 1.350 | 0.803 | quinolinate synthase                                                                                 |
| SI0623 | 1.136 | 1.767 | 0.978 | 1.406 | unknown protein                                                                                      |
| SI0625 | 0.942 | 1.140 | 0.681 | 0.957 | unknown protein                                                                                      |
| SI0626 | 0.815 | 0.892 | 0.872 | 1.036 | putative neutral invertase                                                                           |
| SI0629 | 0.878 | 0.733 | 3.155 | 2.564 | alternative photosystem I reaction center subunit X                                                  |
| SI0630 | 0.528 | 0.518 | 0.433 | 0.256 | unknown protein                                                                                      |
| SI0631 | 0.764 | 0.735 | 0.864 | 0.787 | L-aspartate oxidase                                                                                  |
| SI0634 | 0.830 | 0.866 | 1.017 | 0.841 | photosystem I biogenesis protein BtpA                                                                |
| SI0635 | 0.854 | 0.814 | 1.447 | 1.403 | probable thiamine-phosphate pyrophosphorylase                                                        |
| SI0635 | 0.854 | 0.814 | 1.447 | 1.403 | probable thiamine-phosphate pyrophosphorylase                                                        |
| SI0638 | 1.639 | 1.859 | 1.182 | 1.508 | periplasmic protein, function unknown                                                                |
| SI0639 | 1.318 | 1.258 | 1.364 | 1.259 | hypothetical protein                                                                                 |
| SI0640 | 0.789 | 0.784 | 0.849 | 0.806 | probable sodium/sulfate symporter                                                                    |
| SI0643 | 0.937 | 1.250 | 1.261 | 1.196 | urease accessory protein G                                                                           |
| SI0644 | 1.215 | 0.833 | 1.021 | 0.667 | probable esterase                                                                                    |
| SI0645 | 0.883 | 0.917 | 0.678 | 0.576 | unknown protein                                                                                      |
| SI0646 | 0.873 | 0.861 | 1.035 | 1.175 | guanylyl cyclase                                                                                     |
| SI0649 | 0.782 | 1.136 | 1.218 | 1.637 | two-component response regulator OmpR subfamily                                                      |
| SI0649 | 0.782 | 1.136 | 1.218 | 1.637 | two-component response regulator OmpR subfamily                                                      |
| SI0654 | 1.089 | 1.490 | 1.086 | 1.179 | alkaline phosphatase                                                                                 |
| SI0656 | 0.843 | 1.119 | 0.595 | 0.792 | unknown protein                                                                                      |
| SI0659 | 0.939 | 0.901 | 0.801 | 0.934 | hypothetical protein                                                                                 |
| SI0660 | 0.934 | 0.964 | 0.894 | 0.820 | pyridoxal phosphate biosynthetic protein PdxA                                                        |
| SI0661 | 0.935 | 1.274 | 1.009 | 1.422 | hypothetical protein YCF35                                                                           |
| SI0672 | 0.728 | 0.730 | 0.818 | 0.764 | cation-transporting p-type ATPase PacL                                                               |
| SI0676 | 0.587 | 0.676 | 0.619 | 0.668 | hypothetical protein                                                                                 |
| SI0679 | 0.684 | 0.867 | 0.574 | 0.718 | periplasmic phosphate-binding protein of ABC transporter                                             |
| SI0680 | 1.106 | 1.626 | 1.105 | 1.504 | phosphate-binding periplasmic protein precursor (PBP)                                                |
| SI0685 | 0.407 | 0.494 | 0.868 | 0.898 | hypothetical protein                                                                                 |
| SI0689 | 0.969 | 0.604 | 0.449 | 0.216 | Na <sup>+</sup> /H <sup>+</sup> antiporter                                                           |
| SI0691 | 0.907 | 0.701 | 1.031 | 0.855 | hypothetical protein                                                                                 |
| SI0698 | 0.698 | 0.803 | 0.937 | 0.966 | drug sensory protein A, low temperature sensor, two-component sensor histidine kinase                |
| SI0703 | 1.101 | 1.199 | 0.904 | 1.199 | unknown protein                                                                                      |
| SI0704 | 0.604 | 0.625 | 0.912 | 0.888 | cysteine desulfurase                                                                                 |
| SI0708 | 0.755 | 1.486 | 1.397 | 2.160 | dimethyladenosine transferase                                                                        |
| SI0708 | 0.755 | 1.486 | 1.397 | 2.160 | dimethyladenosine transferase                                                                        |
| SI0709 | 0.833 | 0.628 | 0.620 | 0.740 | putative endonuclease                                                                                |
| SI0711 | 1.018 | 1.239 | 0.803 | 0.998 | isopentenyl monophosphate kinase                                                                     |
| SI0712 | 1.319 | 1.007 | 1.647 | 1.073 | cysteine synthase                                                                                    |
| SI0716 | 0.606 | 0.577 | 0.563 | 0.597 | leader peptidase I (signal peptidase I)                                                              |
| SI0721 | 1.395 | 1.294 | 0.741 | 0.765 | unknown protein                                                                                      |
| SI0723 | 3.021 | 2.451 | 3.215 | 2.660 | unknown protein                                                                                      |
| SI0726 | 1.028 | 1.314 | 0.986 | 1.238 | phosphoglucomutase                                                                                   |
| SI0728 | 0.900 | 0.859 | 1.244 | 1.186 | acetyl-CoA carboxylase alpha subunit                                                                 |
| SI0729 | 1.064 | 1.259 | 1.230 | 1.570 | probable DNA methyltransferase                                                                       |
| SI0735 | 0.781 | 0.782 | 0.953 | 0.887 | hypothetical protein                                                                                 |
| SI0736 | 0.713 | 0.853 | 0.513 | 0.560 | hypothetical protein                                                                                 |
| SI0737 | 0.734 | 0.746 | 0.887 | 0.730 | hypothetical protein                                                                                 |
| SI0740 | 0.978 | 1.202 | 0.696 | 0.772 | hypothetical protein                                                                                 |
| SI0741 | 1.000 | 0.816 | 1.033 | 0.943 | pyruvate flavodoxin oxidoreductase                                                                   |
| SI0742 | 1.748 | 1.608 | 1.116 | 1.271 | hypothetical protein                                                                                 |
| SI0744 | 0.994 | 0.725 | 0.954 | 0.889 | hypothetical protein                                                                                 |
| SI0745 | 0.760 | 0.798 | 0.730 | 1.003 | phosphofructokinase                                                                                  |
| SI0749 | 1.049 | 1.053 | 0.875 | 0.989 | hypothetical protein                                                                                 |
| SI0750 | 0.938 | 0.979 | 0.833 | 0.907 | two-component sensor histidine kinase, KaiC-interacting protein, involved in circadian rhythm        |
| SI0751 | 1.080 | 1.256 | 0.597 | 0.465 | hypothetical protein YCF22                                                                           |
| SI0752 | 1.212 | 1.188 | 0.882 | 0.814 | hypothetical protein                                                                                 |
| SI0753 | 0.943 | 0.929 | 1.104 | 1.147 | FoD bifunctional protein                                                                             |
| SI0754 | 1.138 | 1.362 | 1.127 | 1.376 | ribosome binding factor A                                                                            |
| SI0755 | 0.858 | 1.081 | 0.962 | 1.316 | thioredoxin peroxidase                                                                               |
| SI0756 | 0.722 | 0.592 | 0.800 | 0.554 | unknown protein                                                                                      |
| SI0757 | 0.853 | 0.975 | 0.906 | 1.016 | amidophosphoribosyltransferase                                                                       |
| SI0759 | 1.179 | 1.610 | 1.200 | 1.647 | ABC transporter ATP-binding protein                                                                  |
| SI0759 | 1.179 | 1.610 | 1.200 | 1.647 | ABC transporter ATP-binding protein                                                                  |
| SI0760 | 1.290 | 1.182 | 1.068 | 1.040 | hypothetical protein YCF38                                                                           |
| SI0764 | 0.984 | 1.120 | 1.466 | 1.292 | urea transport system ATP-binding protein                                                            |
| SI0766 | 0.829 | 1.153 | 0.684 | 0.695 | DNA repair protein RadC                                                                              |
| SI0767 | 1.017 | 0.611 | 1.441 | 1.013 | 50S ribosomal protein L20                                                                            |
| SI0771 | 0.912 | 0.737 | 1.366 | 0.920 | glucose transport protein                                                                            |
| SI0772 | 1.267 | 0.667 | 1.280 | 0.938 | probable porin; major outer membrane protein                                                         |
| SI0781 | 0.945 | 1.036 | 0.594 | 0.724 | hypothetical protein                                                                                 |
| SI0783 | 1.493 | 1.101 | 1.111 | 0.847 | unknown protein                                                                                      |
| SI0788 | 0.176 | 0.193 | 0.356 | 0.293 | hypothetical protein                                                                                 |
| SI0789 | 0.240 | 0.218 | 0.341 | 0.354 | two-component response regulator OmpR subfamily                                                      |
| SI0790 | 0.418 | 0.489 | 0.454 | 0.415 | two-component sensor histidine kinase                                                                |
| SI0802 | 1.021 | 0.485 | 0.796 | 0.373 | hypothetical protein                                                                                 |
| SI0804 | 0.685 | 0.789 | 1.056 | 1.200 | hypothetical protein                                                                                 |
| SI0807 | 1.099 | 1.181 | 1.072 | 1.134 | pentose-5-phosphate-3-epimerase                                                                      |
| SI0813 | 0.819 | 0.912 | 0.700 | 0.665 | cytochrome c oxidase subunit II                                                                      |
| SI0814 | 1.203 | 1.517 | 1.253 | 1.560 | hypothetical protein                                                                                 |
| SI0815 | 1.247 | 1.404 | 1.397 | 1.284 | unknown protein                                                                                      |
| SI0816 | 1.105 | 1.085 | 1.085 | 0.990 | probable oxidoreductase                                                                              |
| SI0818 | 0.846 | 0.901 | 0.663 | 0.727 | tetrapyrrole methylase family protein                                                                |
| SI0819 | 0.975 | 0.765 | 1.661 | 1.456 | photosystem I reaction center subunit III precursor (PSI-F), plastocyanin (cyt c553) docking protein |
| SI0821 | 1.058 | 0.921 | 1.250 | 0.867 | phytochrome-like protein                                                                             |
| SI0822 | 1.004 | 1.385 | 1.085 | 1.712 | hypothetical protein                                                                                 |
| SI0823 | 0.904 | 0.890 | 1.172 | 1.022 | probable succinate dehydrogenase iron-sulfur protein                                                 |
| SI0827 | 1.553 | 0.456 | 0.733 | 0.212 | hypothetical protein                                                                                 |
| SI0828 | 1.582 | 1.658 | 1.170 | 1.263 | putative amidase                                                                                     |
| SI0829 | 0.926 | 0.949 | 0.822 | 0.832 | probable methyltransferase                                                                           |
| SI0830 | 0.889 | 0.646 | 0.999 | 0.788 | elongation factor EF-G                                                                               |

|         |       |       |       |       |                                                                                              |
|---------|-------|-------|-------|-------|----------------------------------------------------------------------------------------------|
| SI10832 | 0.730 | 1.337 | 0.824 | 0.945 | hypothetical protein                                                                         |
| SI10833 | 0.841 | 0.649 | 0.832 | 0.633 | probable oligopeptides ABC transporter permease protein                                      |
| SI10834 | 1.294 | 0.530 | 1.996 | 0.907 | low affinity sulfate transporter                                                             |
| SI10837 | 0.654 | 0.755 | 0.481 | 0.560 | periplasmic protein, function unknown                                                        |
| SI10838 | 0.930 | 0.937 | 0.729 | 0.749 | orotidine 5' monophosphate decarboxylase                                                     |
| SI10842 | 1.100 | 1.161 | 1.167 | 1.263 | neopullulanase                                                                               |
| SI10844 | 1.195 | 1.105 | 1.309 | 1.087 | tRNA (5-methylaminomethyl-2-thiouridylylate)-methyltransferase                               |
| SI10846 | 0.912 | 0.454 | 0.378 | 0.186 | hypothetical protein                                                                         |
| SI10848 | 0.799 | 0.984 | 0.676 | 1.280 | chromosomal replication initiator protein DnaA                                               |
| SI10849 | 0.926 | 0.703 | 1.901 | 1.600 | photosystem II reaction center D2 protein                                                    |
| SI10851 | 1.013 | 0.879 | 1.672 | 1.037 | photosystem II CP43 protein                                                                  |
| SI10853 | 1.420 | 1.391 | 1.350 | 1.311 | hypothetical protein                                                                         |
| SI10854 | 0.846 | 0.912 | 1.091 | 0.975 | hypothetical protein                                                                         |
| SI10858 | 2.278 | 0.551 | 2.247 | 0.687 | hypothetical protein                                                                         |
| SI10860 | 0.824 | 0.639 | 0.906 | 0.660 | hypothetical protein                                                                         |
| SI10861 | 0.983 | 1.062 | 1.151 | 1.121 | hypothetical protein                                                                         |
| SI10867 | 1.460 | 1.282 | 1.364 | 1.447 | hypothetical protein                                                                         |
| SI10872 | 0.569 | 0.342 | 0.553 | 0.333 | unknown protein                                                                              |
| SI10873 | 1.063 | 1.209 | 1.050 | 1.199 | carboxynorspermidine decarboxylase                                                           |
| SI10876 | 1.431 | 2.008 | 0.466 | 0.645 | Holliday junction DNA helicase RuvA                                                          |
| SI10877 | 1.074 | 1.418 | 0.876 | 1.059 | hypothetical protein                                                                         |
| SI10886 | 0.987 | 0.967 | 0.969 | 0.880 | hypothetical protein                                                                         |
| SI10887 | 1.248 | 1.269 | 1.616 | 1.894 | putative modulator of DNA gyrase; PmbA homolog                                               |
| SI10888 | 1.218 | 1.166 | 0.636 | 0.836 | hypothetical protein                                                                         |
| SI10891 | 0.868 | 0.739 | 0.707 | 0.554 | malate dehydrogenase                                                                         |
| SI10895 | 0.868 | 0.824 | 0.964 | 0.898 | CysQ protein homolog                                                                         |
| SI10897 | 1.157 | 1.190 | 1.475 | 1.546 | DnaJ protein, heat shock protein 40, molecular chaperone                                     |
| SI10898 | 0.975 | 1.096 | 0.989 | 1.239 | hypothetical protein                                                                         |
| SI10899 | 1.030 | 0.954 | 0.967 | 0.928 | UDP-N-acetylglucosamine pyrophosphorylase                                                    |
| SI10900 | 0.930 | 1.008 | 0.718 | 0.712 | ATP phosphoribosyltransferase                                                                |
| SI10901 | 1.377 | 1.136 | 1.379 | 1.309 | phosphoribosylaminoimidazole carboxylase                                                     |
| SI10902 | 1.003 | 0.953 | 0.969 | 0.925 | ornithine carbamoyltransferase                                                               |
| SI10905 | 0.668 | 0.620 | 0.951 | 0.873 | hypothetical protein                                                                         |
| SI10909 | 0.595 | 0.411 | 0.549 | 0.374 | unknown protein                                                                              |
| SI10912 | 1.082 | 1.083 | 1.565 | 1.449 | ABC transporter ATP binding protein                                                          |
| SI10915 | 0.917 | 1.126 | 0.697 | 0.852 | periplasmic protease                                                                         |
| SI10916 | 0.497 | 0.623 | 0.785 | 0.973 | precorrin isomerase, precorrin-8X methylmutase                                               |
| SI10920 | 0.965 | 1.145 | 1.399 | 1.477 | phosphoenolpyruvate carboxylase                                                              |
| SI10921 | 0.689 | 0.675 | 0.754 | 0.679 | two-component response regulator NarL subfamily                                              |
| SI10921 | 0.689 | 0.675 | 0.754 | 0.679 | two-component response regulator NarL subfamily                                              |
| SI10923 | 0.683 | 0.532 | 0.714 | 0.609 | unknown protein                                                                              |
| SI10925 | 0.706 | 1.093 | 0.544 | 0.875 | hypothetical protein                                                                         |
| SI10927 | 0.917 | 1.208 | 0.622 | 0.817 | S-adenosylmethionine synthetase                                                              |
| SI10928 | 0.842 | 0.628 | 1.289 | 1.003 | allophycocyanin-B                                                                            |
| SI10931 | 1.033 | 1.036 | 1.047 | 0.993 | hypothetical protein                                                                         |
| SI10934 | 1.230 | 1.333 | 1.052 | 1.145 | carboxysome formation protein CcmA                                                           |
| SI10936 | 1.155 | 1.202 | 1.261 | 1.245 | putative oxidoreductase                                                                      |
| SI10938 | 1.071 | 0.853 | 1.259 | 0.993 | aspartate transaminase                                                                       |
| SI10945 | 0.796 | 0.811 | 0.932 | 0.847 | glycogen synthase                                                                            |
| SI10947 | 1.355 | 1.006 | 2.273 | 1.919 | light repressed protein A homolog                                                            |
| SI10981 | 0.895 | 0.880 | 1.116 | 1.038 | unknown protein                                                                              |
| SI10982 | 1.626 | 2.066 | 0.929 | 1.235 | unknown protein                                                                              |
| SI10992 | 1.100 | 1.148 | 0.784 | 0.654 | putative esterase                                                                            |
| SI10995 | 1.048 | 1.595 | 0.730 | 0.997 | hypothetical protein                                                                         |
| SI10996 | 1.182 | 1.229 | 1.232 | 1.357 | hypothetical protein                                                                         |
| SI10997 | 1.339 | 1.346 | 1.148 | 1.263 | hypothetical protein                                                                         |
| SI10998 | 0.703 | 0.769 | 1.361 | 1.079 | LysR family transcriptional regulator                                                        |
| SI11002 | 1.946 | 1.225 | 0.859 | 0.708 | hypothetical protein YCF22                                                                   |
| SI11004 | 0.812 | 0.880 | 1.046 | 1.070 | hypothetical protein                                                                         |
| SI11005 | 1.314 | 0.651 | 1.675 | 0.820 | MazG protein homolog                                                                         |
| SI11017 | 0.839 | 1.233 | 1.030 | 1.416 | ammonium/methylammonium permease                                                             |
| SI11018 | 1.045 | 1.266 | 1.028 | 1.406 | dihydroorotase                                                                               |
| SI11019 | 0.659 | 0.606 | 0.767 | 0.580 | hydroxyacylglutathione hydrolase                                                             |
| SI11020 | 0.873 | 0.991 | 0.925 | 1.135 | probable glycosyltransferase                                                                 |
| SI11021 | 0.840 | 0.873 | 0.907 | 0.954 | hypothetical protein                                                                         |
| SI11023 | 0.970 | 0.823 | 1.014 | 0.911 | succinyl-CoA synthetase beta chain                                                           |
| SI11025 | 0.982 | 1.027 | 0.887 | 1.050 | hypothetical protein                                                                         |
| SI11027 | 1.106 | 0.983 | 2.849 | 2.688 | NADH-dependent glutamate synthase small subunit                                              |
| SI11028 | 0.892 | 0.703 | 0.960 | 0.681 | carbon dioxide concentrating mechanism protein CcmK                                          |
| SI11029 | 0.865 | 0.720 | 0.935 | 0.727 | carbon dioxide concentrating mechanism protein CcmK                                          |
| SI11030 | 0.759 | 0.723 | 0.542 | 0.556 | carbon dioxide concentrating mechanism protein CcmL, putative carboxysome assembly protein   |
| SI11031 | 0.896 | 0.820 | 1.524 | 1.427 | carbon dioxide concentrating mechanism protein CcmM, putative carboxysome structural protein |
| SI11032 | 0.673 | 0.580 | 0.458 | 0.235 | carbon dioxide concentrating mechanism protein CcmN, putative carboxysome assembly protein   |
| SI11033 | 0.880 | 0.833 | 0.790 | 0.754 | probable protein phosphatase                                                                 |
| SI11035 | 1.007 | 1.290 | 0.959 | 1.164 | uracil phosphoribosyltransferase                                                             |
| SI11036 | 0.914 | 0.921 | 0.852 | 0.800 | hypothetical protein                                                                         |
| SI11037 | 1.178 | 1.603 | 1.056 | 1.418 | unknown protein                                                                              |
| SI11039 | 1.003 | 1.017 | 1.006 | 1.032 | hypothetical protein                                                                         |
| SI11040 | 1.335 | 1.658 | 0.567 | 0.655 | unknown protein                                                                              |
| SI11041 | 1.171 | 1.120 | 1.019 | 1.028 | similar to sulfate transport ATP-binding protein CysA                                        |
| SI11043 | 0.913 | 1.033 | 0.818 | 0.954 | polyribonucleotide nucleotidyltransferase                                                    |
| SI11045 | 1.056 | 1.582 | 1.063 | 1.650 | mutator MutI protein                                                                         |
| SI11049 | 0.820 | 0.852 | 0.924 | 0.916 | hypothetical protein                                                                         |
| SI11051 | 1.332 | 1.326 | 0.990 | 0.976 | phycoerythrin alpha-subunit phycoerythrin lyase                                              |
| SI11051 | 1.332 | 1.326 | 0.990 | 0.976 | phycoerythrin alpha-subunit phycoerythrin lyase                                              |
| SI11053 | 1.451 | 1.675 | 0.816 | 0.916 | hypothetical protein                                                                         |
| SI11054 | 0.957 | 0.962 | 0.754 | 0.657 | hypothetical protein                                                                         |
| SI11056 | 0.885 | 0.937 | 1.015 | 1.149 | phosphoribosylformyl glycylamide synthetase II                                               |
| SI11057 | 1.033 | 0.809 | 1.709 | 1.639 | thioredoxin M                                                                                |
| SI11058 | 1.115 | 1.008 | 0.992 | 0.884 | dihydrodipicolinate reductase                                                                |
| SI11059 | 0.895 | 0.801 | 0.966 | 0.712 | adenylate kinase                                                                             |
| SI11060 | 0.818 | 0.781 | 0.769 | 0.497 | hypothetical protein                                                                         |
| SI11064 | 0.781 | 0.883 | 0.689 | 0.726 | hypothetical protein                                                                         |
| SI11069 | 1.002 | 0.851 | 1.499 | 0.988 | 3-oxoacyl-[acyl-carrier-protein] synthase II                                                 |
| SI11070 | 1.418 | 1.595 | 1.527 | 1.949 | transketolase                                                                                |
| SI11071 | 0.948 | 0.912 | 1.332 | 1.183 | hypothetical protein                                                                         |
| SI11072 | 0.719 | 1.206 | 0.436 | 0.722 | hypothetical protein                                                                         |
| SI11074 | 0.951 | 1.135 | 0.955 | 0.945 | leucyl-tRNA synthetase                                                                       |
| SI11077 | 0.996 | 1.112 | 0.898 | 0.932 | agmatinase                                                                                   |
| SI11080 | 0.964 | 0.978 | 0.855 | 0.907 | ABC transport system substrate-binding protein                                               |
| SI11082 | 0.990 | 0.932 | 0.821 | 0.763 | ABC transport system ATP-binding protein                                                     |
| SI11082 | 0.990 | 0.932 | 0.821 | 0.763 | ABC transport system ATP-binding protein                                                     |
| SI11084 | 1.120 | 0.969 | 1.786 | 1.057 | hypothetical protein                                                                         |
| SI11085 | 2.725 | 3.891 | 2.169 | 2.545 | glycerol-3-phosphate dehydrogenase                                                           |
| SI11089 | 1.016 | 0.926 | 0.811 | 0.765 | periplasmic protein, function unknown                                                        |
| SI11091 | 1.495 | 1.499 | 2.558 | 2.358 | geranylgeranyl hydrogenase                                                                   |
| SI11092 | 0.740 | 0.904 | 0.668 | 0.665 | hypothetical protein                                                                         |
| SI11096 | 1.880 | 1.414 | 1.427 | 1.060 | 30S ribosomal protein S12                                                                    |
| SI11097 | 1.541 | 1.672 | 1.792 | 1.748 | 30S ribosomal protein S7                                                                     |
| SI11098 | 0.947 | 1.089 | 0.904 | 1.010 | elongation factor EF-G                                                                       |
| SI11099 | 0.943 | 0.929 | 0.964 | 0.951 | elongation factor Tu                                                                         |
| SI11101 | 1.071 | 1.131 | 2.445 | 3.040 | 30S ribosomal protein S10                                                                    |
| SI11104 | 0.919 | 0.623 | 0.862 | 0.681 | periplasmic substrate-binding protein of a TRAP-type permease                                |
| SI11106 | 1.119 | 1.008 | 1.258 | 1.087 | hypothetical protein                                                                         |
| SI11107 | 0.776 | 0.428 | 0.739 | 0.454 | type IV pilus biogenesis protein Pill homolog                                                |
| SI11108 | 1.012 | 1.031 | 0.834 | 1.072 | stationary-phase survival protein SurE homolog                                               |
| SI11109 | 0.649 | 0.800 | 0.706 | 0.841 | hypothetical protein                                                                         |
| SI11110 | 1.071 | 1.264 | 1.030 | 1.183 | peptide chain release factor 1                                                               |
| SI11112 | 1.036 | 1.198 | 0.968 | 0.958 | 3-dehydroquinate dehydratase                                                                 |
| SI11118 | 1.083 | 1.321 | 0.739 | 0.745 | hypothetical protein                                                                         |
| SI11120 | 0.754 | 0.826 | 0.586 | 0.592 | chromosome segregation protein SMC1                                                          |
| SI11121 | 0.741 | 0.896 | 0.824 | 0.984 | hypothetical protein                                                                         |
| SI11123 | 0.965 | 0.733 | 0.707 | 0.567 | hypothetical protein                                                                         |
| SI11124 | 0.712 | 0.688 | 1.056 | 1.076 | two-component sensor histidine kinase, phytochrome-like protein                              |

|         |       |       |       |       |                                                                                      |
|---------|-------|-------|-------|-------|--------------------------------------------------------------------------------------|
| SII1127 | 1.337 | 1.114 | 1.565 | 1.412 | 1,4-dihydroxy-2-naphthoate synthase                                                  |
| SII1130 | 1.221 | 1.506 | 0.948 | 1.129 | unknown protein                                                                      |
| SII1138 | 1.057 | 1.230 | 1.093 | 1.066 | hypothetical protein                                                                 |
| SII1142 | 0.891 | 1.114 | 0.785 | 1.032 | hypothetical protein                                                                 |
| SII1143 | 1.451 | 1.862 | 1.675 | 2.415 | ATP-dependent helicase PcrA                                                          |
| SII1144 | 1.073 | 1.538 | 1.658 | 2.198 | hypothetical protein                                                                 |
| SII1147 | 0.668 | 0.835 | 1.034 | 1.267 | glutathione S-transferase                                                            |
| SII1150 | 0.915 | 0.704 | 2.398 | 1.689 | hypothetical protein                                                                 |
| SII1151 | 0.823 | 0.758 | 0.854 | 0.678 | unknown protein                                                                      |
| SII1159 | 0.934 | 1.046 | 1.272 | 1.493 | probable bacterioferritin comigratory protein                                        |
| SII1165 | 1.269 | 1.560 | 1.506 | 1.692 | DNA mismatch repair protein                                                          |
| SII1172 | 1.067 | 1.081 | 1.179 | 1.427 | threonine synthase                                                                   |
| SII1173 | 0.677 | 0.901 | 0.670 | 0.971 | hypothetical protein                                                                 |
| SII1174 | 0.992 | 0.998 | 1.299 | 1.284 | unknown protein                                                                      |
| SII1178 | 0.768 | 0.899 | 0.655 | 0.763 | probable carbamoyl transferase                                                       |
| SII1180 | 1.074 | 1.253 | 1.003 | 1.130 | toxin secretion ABC transporter ATP-binding protein                                  |
| SII1181 | 1.397 | 1.256 | 1.422 | 1.368 | similar to hemolysin secretion protein                                               |
| SII1182 | 1.170 | 1.709 | 1.174 | 1.695 | cytochrome b6-f complex alternative iron-sulfur subunit (Rieske iron sulfur protein) |
| SII1184 | 0.849 | 0.894 | 2.288 | 2.119 | heme oxygenase                                                                       |
| SII1185 | 0.945 | 0.957 | 1.689 | 1.597 | coproporphyrinogen III oxidase, aerobic (oxygen-dependent)                           |
| SII1186 | 1.289 | 1.721 | 1.524 | 2.146 | hypothetical protein                                                                 |
| SII1188 | 1.156 | 1.067 | 1.517 | 1.433 | hypothetical protein                                                                 |
| SII1189 | 0.930 | 0.945 | 1.289 | 1.093 | glycolate oxidase subunit GlcE                                                       |
| SII1193 | 0.910 | 0.980 | 0.504 | 0.536 | hypothetical protein                                                                 |
| SII1194 | 1.222 | 0.965 | 2.532 | 2.151 | photosystem II 12 kDa extrinsic protein                                              |
| SII1196 | 0.730 | 0.622 | 1.277 | 0.946 | phosphofructokinase                                                                  |
| SII1198 | 0.794 | 0.635 | 1.135 | 0.562 | tRNA (guanine-N1)-methyltransferase                                                  |
| SII1201 | 0.729 | 0.743 | 0.561 | 0.656 | hypothetical protein                                                                 |
| SII1209 | 0.944 | 1.115 | 0.790 | 0.913 | DNA ligase                                                                           |
| SII1212 | 1.107 | 1.307 | 0.909 | 1.005 | GDP-mannose 4,6-dehydratase                                                          |
| SII1213 | 0.867 | 1.036 | 0.782 | 0.919 | GDP-fucose synthetase                                                                |
| SII1214 | 1.443 | 1.346 | 2.513 | 2.404 | hypothetical protein YCF59                                                           |
| SII1217 | 1.259 | 1.192 | 1.618 | 1.675 | unknown protein                                                                      |
| SII1218 | 0.929 | 0.912 | 0.767 | 0.683 | hypothetical protein YCF39                                                           |
| SII1220 | 1.351 | 1.558 | 1.376 | 1.488 | putative diaphorase subunit of the bidirectional hydrogenase                         |
| SII1221 | 1.208 | 1.311 | 1.290 | 1.351 | diaphorase subunit of the bidirectional hydrogenase                                  |
| SII1222 | 1.112 | 1.282 | 0.909 | 1.060 | hypothetical protein                                                                 |
| SII1223 | 1.368 | 1.211 | 1.144 | 1.065 | diaphorase subunit of the bidirectional hydrogenase                                  |
| SII1224 | 0.746 | 0.543 | 0.984 | 0.540 | hydrogenase subunit of the bidirectional hydrogenase                                 |
| SII1226 | 1.109 | 1.058 | 1.042 | 0.878 | hydrogenase subunit of the bidirectional hydrogenase                                 |
| SII1228 | 0.758 | 0.781 | 0.863 | 0.629 | two-component hybrid sensor and regulator                                            |
| SII1229 | 0.689 | 0.519 | 0.689 | 0.838 | two-component hybrid sensor and regulator                                            |
| SII1231 | 0.883 | 1.271 | 0.291 | 0.484 | mannosyltransferase                                                                  |
| SII1232 | 0.938 | 0.496 | 1.011 | 0.527 | hypothetical protein                                                                 |
| SII1233 | 0.870 | 0.795 | 0.705 | 0.699 | hypothetical protein                                                                 |
| SII1234 | 1.235 | 1.466 | 1.271 | 1.590 | adenosylhomocysteinase                                                               |
| SII1237 | 0.813 | 0.827 | 0.473 | 0.476 | N(5)-glutamine methyltransferase                                                     |
| SII1239 | 0.697 | 0.537 | 0.470 | 0.326 | unknown protein                                                                      |
| SII1242 | 0.772 | 0.558 | 0.632 | 0.623 | hypothetical protein                                                                 |
| SII1244 | 1.099 | 1.350 | 1.961 | 2.457 | 50S ribosomal protein L9                                                             |
| SII1249 | 0.957 | 1.239 | 0.944 | 1.361 | pantothenate synthetase/cytidylate kinase                                            |
| SII1252 | 1.403 | 1.357 | 1.361 | 1.597 | hypothetical protein                                                                 |
| SII1253 | 0.832 | 0.898 | 0.836 | 0.816 | similar to polyA polymerase                                                          |
| SII1254 | 0.778 | 1.004 | 0.705 | 1.054 | hypothetical protein                                                                 |
| SII1258 | 1.010 | 1.043 | 0.749 | 0.915 | dCTP deaminase                                                                       |
| SII1260 | 1.093 | 1.135 | 2.188 | 2.105 | 30S ribosomal protein S2                                                             |
| SII1261 | 1.153 | 1.130 | 1.062 | 1.022 | elongation factor TS                                                                 |
| SII1262 | 0.876 | 0.742 | 0.973 | 1.071 | hypothetical protein                                                                 |
| SII1265 | 1.456 | 1.126 | 0.932 | 0.661 | unknown protein                                                                      |
| SII1267 | 0.972 | 0.997 | 0.680 | 0.689 | unknown protein                                                                      |
| SII1270 | 0.641 | 0.517 | 0.921 | 0.668 | periplasmic substrate-binding and integral membrane protein of the ABC-type          |
| SII1271 | 1.054 | 0.661 | 0.781 | 0.519 | probable porin; major outer membrane protein                                         |
| SII1272 | 1.130 | 1.449 | 0.749 | 1.157 | unknown protein                                                                      |
| SII1273 | 0.886 | 1.037 | 1.170 | 1.203 | unknown protein                                                                      |
| SII1275 | 0.887 | 0.880 | 1.063 | 0.953 | pyruvate kinase 2                                                                    |
| SII1276 | 0.885 | 0.942 | 0.867 | 1.055 | ATP-binding protein of ABC transporter                                               |
| SII1280 | 1.072 | 1.164 | 0.999 | 1.271 | hypothetical protein                                                                 |
| SII1282 | 1.083 | 1.052 | 0.939 | 0.858 | riboflavin synthase beta subunit                                                     |
| SII1284 | 0.786 | 0.936 | 0.728 | 0.864 | esterase                                                                             |
| SII1286 | 0.640 | 0.509 | 1.259 | 1.175 | transcriptional regulator                                                            |
| SII1289 | 1.416 | 0.962 | 1.224 | 0.601 | hypothetical protein                                                                 |
| SII1290 | 0.941 | 1.148 | 1.129 | 1.466 | probable ribonuclease II                                                             |
| SII1291 | 1.016 | 0.816 | 1.575 | 0.914 | two-component response regulator PatA subfamily                                      |
| SII1291 | 1.016 | 0.816 | 1.575 | 0.914 | two-component response regulator PatA subfamily                                      |
| SII1292 | 0.692 | 0.715 | 0.691 | 0.881 | two-component response regulator CheY subfamily                                      |
| SII1293 | 0.493 | 0.462 | 0.260 | 0.304 | unknown protein                                                                      |
| SII1296 | 0.514 | 0.617 | 0.661 | 0.396 | two-component hybrid sensor and regulator                                            |
| SII1298 | 0.881 | 0.869 | 0.847 | 0.886 | putative carboxymethylglutaminylase                                                  |
| SII1299 | 1.092 | 0.881 | 0.860 | 0.936 | acetate kinase                                                                       |
| SII1304 | 0.814 | 0.861 | 0.733 | 0.726 | unknown protein                                                                      |
| SII1305 | 0.678 | 0.503 | 0.898 | 0.449 | probable hydrolase                                                                   |
| SII1306 | 0.737 | 0.673 | 0.515 | 0.462 | periplasmic protein, function unknown                                                |
| SII1307 | 1.437 | 1.389 | 1.006 | 0.986 | periplasmic protein, function unknown                                                |
| SII1308 | 0.848 | 0.769 | 0.805 | 0.825 | probable oxidoreductase                                                              |
| SII1314 | 0.907 | 0.796 | 0.706 | 0.708 | putative C4-dicarboxylase binding protein, periplasmic protein                       |
| SII1315 | 0.806 | 0.995 | 0.565 | 0.723 | unknown protein                                                                      |
| SII1316 | 1.167 | 0.968 | 1.066 | 0.850 | cytochrome b6-f complex iron-sulfur subunit (Rieske iron sulfur protein)             |
| SII1317 | 0.989 | 0.814 | 1.255 | 1.233 | apocytochrome f, component of cytochrome b6/f complex                                |
| SII1318 | 0.770 | 0.966 | 0.894 | 1.107 | hypothetical protein                                                                 |
| SII1322 | 1.025 | 0.306 | 0.942 | 0.282 | ATP synthase A chain of CF(0)                                                        |
| SII1323 | 0.983 | 0.540 | 1.052 | 0.534 | ATP synthase subunit b' of CF(0)                                                     |
| SII1324 | 1.175 | 0.961 | 0.893 | 0.654 | ATP synthase B chain (subunit I) of CF(0)                                            |
| SII1325 | 0.924 | 0.754 | 0.934 | 0.675 | ATP synthase delta chain of CF(1)                                                    |
| SII1326 | 0.923 | 0.880 | 1.029 | 0.988 | ATP synthase alpha chain                                                             |
| SII1327 | 1.245 | 1.456 | 3.509 | 3.788 | ATP synthase gamma chain                                                             |
| SII1329 | 0.867 | 0.792 | 0.959 | 0.935 | inositol monophosphate family protein                                                |
| SII1330 | 1.139 | 1.704 | 0.722 | 1.106 | two-component system response regulator OmpR subfamily                               |
| SII1334 | 0.386 | 0.391 | 1.208 | 1.043 | two-component sensor histidine kinase                                                |
| SII1336 | 0.959 | 1.115 | 0.998 | 1.157 | hypothetical protein                                                                 |
| SII1338 | 0.732 | 0.667 | 0.739 | 0.688 | unknown protein                                                                      |
| SII1341 | 0.952 | 1.074 | 0.858 | 0.990 | bacterioferritin                                                                     |
| SII1342 | 0.951 | 1.043 | 0.873 | 0.973 | NAD(P)-dependent glyceraldehyde-3-phosphate dehydrogenase                            |
| SII1343 | 1.170 | 1.385 | 0.921 | 1.067 | aminopeptidase                                                                       |
| SII1349 | 0.579 | 0.571 | 0.819 | 0.686 | phosphoglycolate phosphatase                                                         |
| SII1350 | 0.801 | 0.340 | 1.233 | 0.502 | hypothetical protein                                                                 |
| SII1354 | 0.970 | 0.864 | 0.769 | 0.815 | single-strand-DNA-specific exonuclease RecJ                                          |
| SII1355 | 0.727 | 0.776 | 0.600 | 0.534 | hypothetical protein                                                                 |
| SII1356 | 1.138 | 0.893 | 1.183 | 0.913 | glycogen phosphorylase                                                               |
| SII1358 | 0.753 | 0.845 | 0.512 | 0.597 | putative oxalate decarboxylase, periplasmic protein                                  |
| SII1359 | 0.759 | 1.115 | 0.541 | 0.822 | unknown protein                                                                      |
| SII1360 | 0.828 | 1.101 | 0.814 | 0.834 | DNA polymerase III subunit gamma/tau [Contains: Ssp dnaX intein]                     |
| SII1362 | 1.188 | 1.309 | 1.321 | 1.555 | isoleucyl-tRNA synthetase                                                            |
| SII1363 | 0.970 | 1.125 | 0.769 | 0.890 | ketol-acid reductoisomerase                                                          |
| SII1365 | 0.822 | 0.877 | 0.847 | 1.101 | unknown protein                                                                      |
| SII1366 | 1.110 | 1.121 | 1.189 | 1.117 | putative SNF2 helicase                                                               |
| SII1367 | 0.868 | 0.826 | 0.883 | 0.967 | hypothetical protein                                                                 |
| SII1369 | 0.678 | 1.119 | 1.199 | 2.033 | putative peptidase                                                                   |
| SII1370 | 0.994 | 1.292 | 0.685 | 0.930 | mannose-1-phosphate guanylyltransferase                                              |
| SII1371 | 0.888 | 1.119 | 0.985 | 1.063 | cAMP receptor protein, essential for motility                                        |
| SII1374 | 0.860 | 1.101 | 0.869 | 1.099 | probable sugar transporter                                                           |
| SII1376 | 0.936 | 1.451 | 1.024 | 1.348 | hypothetical protein                                                                 |
| SII1377 | 0.791 | 1.247 | 0.677 | 0.802 | probable glycosyltransferase                                                         |
| SII1378 | 1.372 | 1.531 | 0.984 | 1.161 | periplasmic protein, function unknown                                                |
| SII1380 | 1.185 | 1.577 | 0.805 | 0.970 | periplasmic protein, function unknown                                                |

|         |       |        |       |       |                                                                                        |
|---------|-------|--------|-------|-------|----------------------------------------------------------------------------------------|
| Sl11381 | 0.881 | 0.905  | 1.212 | 0.990 | hypothetical protein                                                                   |
| Sl11382 | 1.062 | 0.894  | 1.174 | 1.172 | ferredoxin, petF-like protein                                                          |
| Sl11383 | 1.304 | 1.435  | 0.962 | 1.092 | probable myo-inositol-1(or 4)-monophosphatase                                          |
| Sl11384 | 0.960 | 1.094  | 1.383 | 1.805 | similar to DnaJ protein                                                                |
| Sl11387 | 0.843 | 0.850  | 0.485 | 0.483 | serine/threonine protein phosphatase PppA                                              |
| Sl11388 | 1.302 | 1.071  | 0.885 | 0.888 | hypothetical protein                                                                   |
| Sl11390 | 0.978 | 0.978  | 1.017 | 0.849 | hypothetical protein                                                                   |
| Sl11392 | 1.776 | 2.066  | 1.225 | 1.406 | transcriptional regulator                                                              |
| Sl11393 | 1.037 | 0.982  | 1.127 | 1.086 | glycogen (starch) synthase                                                             |
| Sl11394 | 1.477 | 1.560  | 1.437 | 1.783 | peptide methionine sulfoxide reductase                                                 |
| Sl11395 | 1.042 | 1.590  | 0.925 | 1.403 | dTDP-6-deoxy-L-mannose-dehydrogenase                                                   |
| Sl11396 | 1.120 | 1.577  | 1.229 | 1.176 | unknown protein                                                                        |
| Sl11398 | 1.222 | 0.948  | 1.202 | 0.917 | photosystem II reaction center 13 kDa protein                                          |
| Sl11399 | 1.001 | 1.003  | 1.047 | 1.019 | hypothetical protein                                                                   |
| Sl11400 | 1.060 | 0.788  | 0.848 | 0.622 | hypothetical protein                                                                   |
| Sl11414 | 1.151 | 0.983  | 1.014 | 1.073 | hypothetical protein                                                                   |
| Sl11415 | 0.889 | 0.694  | 0.769 | 0.628 | hypothetical protein                                                                   |
| Sl11418 | 0.846 | 0.597  | 1.242 | 1.073 | photosystem II oxygen-evolving complex 23K protein PsbP homolog                        |
| Sl11423 | 0.858 | 0.825  | 0.770 | 1.000 | global nitrogen regulator                                                              |
| Sl11424 | 1.037 | 0.810  | 1.188 | 0.754 | hypothetical protein                                                                   |
| Sl11425 | 0.982 | 1.030  | 1.182 | 1.297 | proline-tRNA ligase                                                                    |
| Sl11427 | 1.076 | 1.513  | 0.797 | 1.172 | protease                                                                               |
| Sl11430 | 1.241 | 1.316  | 1.174 | 1.100 | adenine phosphoribosyltransferase                                                      |
| Sl11432 | 0.423 | 0.670  | 0.385 | 0.625 | putative hydrogenase expression/formation protein HypB                                 |
| Sl11432 | 0.423 | 0.670  | 0.385 | 0.625 | putative hydrogenase expression/formation protein HypB                                 |
| Sl11433 | 0.797 | 0.769  | 0.818 | 0.907 | hypothetical protein                                                                   |
| Sl11434 | 0.700 | 0.964  | 1.086 | 1.109 | penicillin-binding protein                                                             |
| Sl11435 | 0.929 | 1.056  | 1.043 | 1.163 | glutamyl-tRNA(Gln) amidotransferase subunit B                                          |
| Sl11440 | 0.799 | 0.921  | 0.904 | 1.140 | pyridoxamine 5'-phosphate oxidase                                                      |
| Sl11443 | 1.101 | 1.176  | 2.174 | 2.020 | CTP synthetase                                                                         |
| Sl11444 | 0.877 | 0.761  | 1.066 | 0.815 | 3-isopropylmalate dehydratase small subunit                                            |
| Sl11446 | 0.670 | 0.901  | 0.509 | 0.707 | hypothetical protein                                                                   |
| Sl11447 | 1.156 | 0.876  | 0.779 | 0.583 | hypothetical protein                                                                   |
| Sl11450 | 1.344 | 1.176  | 1.351 | 1.107 | nitrate/nitrite transport system substrate-binding protein                             |
| Sl11451 | 1.477 | 1.036  | 1.488 | 1.031 | nitrate/nitrite transport system permease protein                                      |
| Sl11452 | 1.287 | 1.178  | 1.825 | 1.484 | nitrate/nitrite transport system ATP-binding protein                                   |
| Sl11453 | 1.709 | 1.307  | 1.996 | 1.642 | nitrate/nitrite transport system ATP-binding protein                                   |
| Sl11454 | 1.616 | 1.205  | 0.951 | 0.861 | ferredoxin-nitrate reductase                                                           |
| Sl11455 | 1.416 | 1.898  | 0.555 | 0.913 | hypothetical protein                                                                   |
| Sl11456 | 0.844 | 0.902  | 0.790 | 0.814 | unknown protein                                                                        |
| Sl11457 | 0.816 | 0.770  | 0.798 | 0.778 | probable glycosyltransferase                                                           |
| Sl11459 | 1.330 | 1.350  | 2.203 | 2.890 | stationary-phase survival protein SurE homolog                                         |
| Sl11461 | 1.033 | 1.362  | 0.662 | 0.862 | hypothetical protein                                                                   |
| Sl11462 | 1.005 | 1.381  | 0.807 | 1.063 | putative hydrogenase expression/formation protein HypE                                 |
| Sl11463 | 1.242 | 1.087  | 1.786 | 1.600 | cell division protein FtsH                                                             |
| Sl11464 | 1.104 | 0.741  | 1.508 | 0.999 | hypothetical protein                                                                   |
| Sl11466 | 0.916 | 1.209  | 0.927 | 1.133 | probable glycosyltransferase                                                           |
| Sl11470 | 0.948 | 0.968  | 1.499 | 1.490 | 3-isopropylmalate dehydratase large subunit                                            |
| Sl11471 | 1.008 | 1.017  | 1.198 | 1.266 | phycobilisome rod-core linker polypeptide                                              |
| Sl11473 | 2.083 | 1.138  |       |       | a part of phytochrome-like sensor histidine kinase gene (disrupted by insertion of IS) |
| Sl11475 | 1.054 | 0.935  | 1.276 | 1.520 | a part of phytochrome-like sensor histidine kinase gene (disrupted by insertion of IS) |
| Sl11479 | 0.753 | 1.198  | 0.599 | 1.076 | 6-phosphogluconolactonase                                                              |
| Sl11481 | 1.148 | 1.580  | 0.905 | 1.239 | ABC-transporter membrane fusion protein                                                |
| Sl11483 | 3.937 | 12.821 | 3.040 | 9.346 | periplasmic protein, similar to transforming growth factor induced protein             |
| Sl11484 | 0.919 | 1.229  | 0.958 | 1.269 | type 2 NADH dehydrogenase                                                              |
| Sl11486 | 1.284 | 1.119  | 0.737 | 0.634 | hypothetical protein                                                                   |
| Sl11489 | 0.696 | 0.704  | 1.099 | 0.739 | circadian phase modifier CpmA homolog                                                  |
| Sl11491 | 1.157 | 1.339  | 1.042 | 1.199 | periplasmic WD-repeat protein                                                          |
| Sl11495 | 0.660 | 0.826  | 0.911 | 1.011 | hypothetical protein                                                                   |
| Sl11496 | 0.846 | 1.018  | 1.361 | 1.597 | mannose-1-phosphate guanyltansferase                                                   |
| Sl11498 | 1.142 | 1.232  | 0.958 | 1.193 | carbamoyl-phosphate synthase small chain                                               |
| Sl11499 | 1.045 | 0.981  | 1.271 | 1.176 | ferredoxin-dependent glutamate synthase                                                |
| Sl11500 | 0.746 | 1.508  | 0.281 | 0.561 | hypothetical protein                                                                   |
| Sl11502 | 1.050 | 0.942  | 1.965 | 1.639 | NADH-dependent glutamate synthase large subunit                                        |
| Sl11504 | 1.222 | 0.939  | 0.750 | 0.569 | hypothetical protein                                                                   |
| Sl11505 | 0.887 | 0.692  | 0.780 | 0.601 | hypothetical protein                                                                   |
| Sl11507 | 0.502 | 0.667  | 1.089 | 1.072 | salt-induced periplasmic protein                                                       |
| Sl11508 | 1.006 | 1.267  | 0.815 | 0.912 | UDP-3-0-acyl N-acetylglucosamine deacetylase                                           |
| Sl11514 | 1.368 | 2.865  | 0.214 | 0.535 | 16.6 kDa small heat shock protein, molecular chaperone                                 |
| Sl11516 | 0.611 | 0.903  | 0.534 | 0.686 | hypothetical protein                                                                   |
| Sl11520 | 0.619 | 0.691  | 0.555 | 0.460 | DNA repair protein RecN                                                                |
| Sl11521 | 1.047 | 0.937  | 1.321 | 1.297 | flavoprotein                                                                           |
| Sl11524 | 0.881 | 1.147  | 0.701 | 0.835 | hypothetical protein                                                                   |
| Sl11525 | 0.922 | 0.818  | 0.935 | 0.838 | phosphoribulokinase                                                                    |
| Sl11526 | 0.929 | 1.080  | 1.065 | 1.188 | hypothetical protein                                                                   |
| Sl11528 | 1.010 | 1.175  | 1.381 | 1.563 | unknown protein                                                                        |
| Sl11530 | 0.998 | 1.178  | 0.919 | 1.111 | unknown protein                                                                        |
| Sl11532 | 0.960 | 1.167  | 0.820 | 0.773 | hypothetical protein                                                                   |
| Sl11533 | 0.586 | 0.459  | 0.868 | 0.615 | probable glycosyltransferase                                                           |
| Sl11534 | 0.765 | 0.560  | 1.292 | 0.935 | probable glycosyltransferase                                                           |
| Sl11536 | 0.914 | 1.208  | 0.889 | 1.056 | molybdopterin biosynthesis MoeB protein                                                |
| Sl11537 | 0.823 | 0.829  | 0.627 | 0.601 | similar to mutator MutI protein                                                        |
| Sl11538 | 1.174 | 0.945  | 0.907 | 0.907 | similar to beta-hexosaminidase a precursor                                             |
| Sl11541 | 1.464 | 2.198  | 1.229 | 2.208 | hypothetical protein                                                                   |
| Sl11542 | 0.867 | 1.001  | 0.742 | 0.845 | hypothetical protein                                                                   |
| Sl11545 | 1.068 | 1.264  | 0.840 | 1.032 | glutathione S-transferase                                                              |
| Sl11546 | 1.075 | 1.091  | 1.736 | 1.838 | exopolyphosphatase                                                                     |
| Sl11546 | 1.075 | 1.091  | 1.736 | 1.838 | exopolyphosphatase                                                                     |
| Sl11549 | 0.383 | 0.270  | 1.000 | 0.616 | salt-enhanced periplasmic protein                                                      |
| Sl11550 | 0.743 | 0.530  | 0.525 | 0.430 | probable porin; major outer membrane protein                                           |
| Sl11553 | 0.914 | 0.942  | 1.038 | 1.058 | phenylalanyl-tRNA synthetase                                                           |
| Sl11555 | 0.688 | 0.797  | 0.596 | 0.680 | two-component hybrid sensor and regulator                                              |
| Sl11556 | 0.706 | 1.107  | 0.612 | 0.894 | isopentenyl-diphosphate delta-isomerase                                                |
| Sl11557 | 0.770 | 0.560  | 0.789 | 0.476 | succinyl-CoA synthetase alpha chain                                                    |
| Sl11558 | 0.727 | 0.937  | 0.471 | 0.587 | mannose-1-phosphate guanyltansferase                                                   |
| Sl11559 | 0.962 | 1.355  | 0.679 | 0.962 | soluble hydrogenase 42 kD subunit                                                      |
| Sl11561 | 0.805 | 0.975  | 0.896 | 1.012 | proline oxidase                                                                        |
| Sl11563 | 0.781 | 0.998  | 0.697 | 0.926 | unknown protein                                                                        |
| Sl11564 | 0.978 | 0.933  | 0.634 | 0.873 | putative lyase                                                                         |
| Sl11566 | 2.392 | 3.401  | 1.631 | 2.392 | glucosylglycerolphosphate synthase                                                     |
| Sl11568 | 1.033 | 1.277  | 0.788 | 0.744 | fibrillin                                                                              |
| Sl11570 | 1.456 | 1.873  | 1.366 | 1.377 | unknown protein                                                                        |
| Sl11571 | 1.182 | 0.918  | 0.880 | 0.766 | hypothetical protein                                                                   |
| Sl11577 | 1.018 | 0.895  | 1.139 | 1.033 | phycocyanin beta subunit                                                               |
| Sl11578 | 0.989 | 0.691  | 1.277 | 0.880 | phycocyanin alpha subunit                                                              |
| Sl11579 | 1.093 | 1.167  | 1.828 | 1.919 | phycobilisome rod linker polypeptide                                                   |
| Sl11580 | 0.998 | 1.044  | 1.957 | 2.273 | phycobilisome rod linker polypeptide                                                   |
| Sl11581 | 0.614 | 0.588  | 0.665 | 0.613 | hypothetical protein                                                                   |
| Sl11582 | 0.793 | 1.178  | 0.835 | 1.224 | unknown protein                                                                        |
| Sl11583 | 0.973 | 0.660  | 1.215 | 0.847 | unknown protein                                                                        |
| Sl11584 | 0.833 | 0.657  | 1.218 | 0.948 | ferredoxin like protein                                                                |
| Sl11590 | 1.166 | 1.475  | 1.037 | 1.050 | two-component sensor histidine kinase                                                  |
| Sl11592 | 1.272 | 1.961  | 0.959 | 1.675 | two-component response regulator NarL subfamily                                        |
| Sl11594 | 1.295 | 1.048  | 1.431 | 1.106 | ndhF3 operon transcriptional regulator, LysR family protein                            |
| Sl11595 | 0.808 | 1.326  | 0.831 | 1.603 | circadian clock protein KaiC homolog                                                   |
| Sl11596 | 0.769 | 0.656  | 0.702 | 0.517 | circadian clock protein KaiB homolog                                                   |
| Sl11598 | 2.857 | 1.563  | 1.425 | 0.917 | Mn transporter MntC                                                                    |
| Sl11600 | 0.239 | 0.290  | 0.331 | 0.404 | manganese transport system membrane protein MntB                                       |
| Sl11605 | 0.835 | 0.719  | 0.784 | 0.603 | (3R)-hydroxymyristoyl acyl carrier protein dehydrase                                   |
| Sl11606 | 1.082 | 1.161  | 0.984 | 0.873 | hypothetical protein                                                                   |
| Sl11608 | 0.812 | 1.004  | 1.121 | 1.412 | hypothetical protein                                                                   |
| Sl11612 | 0.555 | 0.332  | 0.484 | 0.286 | folylpolyglutamate synthase                                                            |
| Sl11613 | 0.864 | 0.699  | 0.595 | 0.476 | unknown protein                                                                        |
| Sl11614 | 1.326 | 1.279  | 1.142 | 1.125 | cation-transporting P-type ATPase                                                      |



|        |       |       |       |       |                                                                                           |
|--------|-------|-------|-------|-------|-------------------------------------------------------------------------------------------|
| SH1615 | 0.775 | 0.944 | 0.816 | 0.889 | thiophen and furan oxidation protein                                                      |
| SH1618 | 1.188 | 1.209 | 1.055 | 0.973 | hypothetical protein                                                                      |
| SH1620 | 2.058 | 1.311 | 1.082 | 0.709 | hypothetical protein                                                                      |
| SH1621 | 1.560 | 1.244 | 0.659 | 0.552 | AhpC/TSA family protein                                                                   |
| SH1623 | 0.747 | 0.655 | 0.758 | 0.723 | ABC transporter ATP-binding protein                                                       |
| SH1624 | 1.238 | 1.631 | 1.370 | 1.786 | two-component response regulator                                                          |
| SH1625 | 1.289 | 1.340 | 0.903 | 0.849 | succinate dehydrogenase iron- sulphur protein subunit                                     |
| SH1626 | 1.323 | 1.629 | 1.575 | 1.880 | LexA repressor                                                                            |
| SH1628 | 0.855 | 1.174 | 0.695 | 0.894 | hypothetical protein                                                                      |
| SH1629 | 1.764 | 1.869 | 1.188 | 1.245 | bacterial cryptochrome                                                                    |
| SH1632 | 0.944 | 0.812 | 1.107 | 0.940 | hypothetical protein                                                                      |
| SH1633 | 1.066 | 0.919 | 0.905 | 0.668 | cell division protein FtsZ                                                                |
| SH1634 | 0.999 | 1.522 | 0.961 | 1.381 | hypothetical protein                                                                      |
| SH1635 | 1.217 | 1.393 | 1.129 | 1.364 | Thy1 protein homolog                                                                      |
| SH1636 | 0.980 | 0.974 | 0.780 | 0.787 | ferrityochelin binding protein                                                            |
| SH1638 | 1.148 | 1.045 | 1.178 | 1.018 | hypothetical protein                                                                      |
| SH1640 | 0.856 | 0.917 | 0.594 | 0.689 | hypothetical protein                                                                      |
| SH1641 | 1.134 | 1.332 | 1.075 | 1.227 | glutamate decarboxylase                                                                   |
| SH1647 | 0.878 | 1.221 | 0.831 | 1.143 | probable phosphinothricin N-acetyltransferase                                             |
| SH1652 | 1.104 | 1.414 | 1.214 | 3.717 | hypothetical protein                                                                      |
| SH1653 | 0.896 | 1.000 | 0.949 | 1.050 | 2-phytyl-1,4-benzoquinone methyltransferase                                               |
| SH1654 | 0.969 | 0.844 | 1.178 | 1.034 | hypothetical protein                                                                      |
| SH1656 | 0.838 | 0.930 | 1.189 | 1.164 | hypothetical protein                                                                      |
| SH1659 | 0.672 | 0.816 | 0.855 | 1.025 | hypothetical protein                                                                      |
| SH1660 | 1.160 | 0.824 | 0.544 | 0.382 | hypothetical protein                                                                      |
| SH1662 | 0.621 | 0.886 | 0.792 | 1.035 | probable prephenate dehydratase                                                           |
| SH1663 | 1.151 | 1.217 | 1.176 | 1.175 | phycocyanin alpha phycocyanobilin lyase related protein                                   |
| SH1663 | 1.151 | 1.217 | 1.176 | 1.175 | phycocyanin alpha phycocyanobilin lyase related protein                                   |
| SH1664 | 0.831 | 0.911 | 0.651 | 0.881 | probable glycosyl transferase                                                             |
| SH1665 | 0.632 | 0.682 | 0.723 | 0.847 | unknown protein                                                                           |
| SH1667 | 1.337 | 1.792 | 1.282 | 1.511 | periplasmic protein, similar to mitochondrial outer membrane 72K protein                  |
| SH1669 | 0.919 | 0.839 | 0.811 | 0.520 | shikimate kinase                                                                          |
| SH1672 | 0.819 | 0.991 | 0.521 | 0.725 | two-component hybrid sensor and regulator                                                 |
| SH1673 | 0.890 | 1.072 | 0.640 | 0.783 | two-component response regulator                                                          |
| SH1676 | 0.952 | 0.842 | 0.912 | 0.918 | 4-alpha-glucanotransferase                                                                |
| SH1679 | 0.705 | 0.819 | 0.625 | 0.706 | periplasmic protease HhoA                                                                 |
| SH1680 | 1.242 | 1.420 | 1.311 | 1.447 | hypothetical protein                                                                      |
| SH1682 | 0.962 | 1.238 | 0.654 | 0.834 | alanine dehydrogenase                                                                     |
| SH1683 | 0.625 | 0.996 | 0.589 | 0.811 | lysine decarboxylase                                                                      |
| SH1687 | 0.540 | 0.645 | 0.650 | 0.767 | unknown protein                                                                           |
| SH1688 | 1.385 | 1.669 | 1.233 | 1.447 | threonine synthase                                                                        |
| SH1689 | 1.130 | 2.119 | 0.975 | 1.805 | group2 RNA polymerase sigma factor SigE                                                   |
| SH1692 | 0.675 | 0.493 | 0.946 | 0.519 | hypothetical protein                                                                      |
| SH1693 | 0.672 | 0.645 | 0.907 | 0.659 | hypothetical protein                                                                      |
| SH1694 | 0.822 | 0.822 | 1.479 | 1.689 | pilin polypeptide PilA1                                                                   |
| SH1696 | 0.982 | 1.179 | 0.842 | 0.999 | hypothetical protein                                                                      |
| SH1697 | 0.931 | 0.873 | 0.574 | 0.448 | hypothetical protein                                                                      |
| SH1699 | 1.036 | 0.896 | 0.750 | 0.704 | oligopeptide-binding protein of oligopeptide ABC transporter                              |
| SH1703 | 0.806 | 0.721 | 0.662 | 0.628 | protease IV                                                                               |
| SH1704 | 0.708 | 0.902 | 0.596 | 0.852 | probable short chain dehydrogenase                                                        |
| SH1708 | 0.650 | 0.733 | 0.460 | 0.451 | two-component response regulator NarL, subfamily                                          |
| SH1709 | 0.902 | 0.538 | 0.818 | 0.641 | 3-ketoacyl-acyl carrier protein reductase                                                 |
| SH1712 | 0.770 | 1.064 | 0.498 | 0.583 | DNA binding protein HU                                                                    |
| SH1713 | 0.838 | 1.032 | 0.583 | 0.612 | histidinol-phosphate aminotransferase                                                     |
| SH1721 | 0.971 | 0.990 | 1.325 | 1.337 | pyruvate dehydrogenase E1 component, beta subunit                                         |
| SH1723 | 1.124 | 1.071 | 0.898 | 0.848 | probable glycosyltransferase                                                              |
| SH1730 |       | 1.479 | 0.784 |       | unknown protein                                                                           |
| SH1732 | 0.929 | 0.560 | 0.074 | 0.044 | NADH dehydrogenase subunit 5 (involved in low CO2-inducible, high affinity CO2 uptake)    |
| SH1732 | 0.929 | 0.560 | 0.074 | 0.044 | NADH dehydrogenase subunit 5 (involved in low CO2-inducible, high affinity CO2 uptake)    |
| SH1734 | 1.282 | 1.901 | 0.263 | 0.353 | protein involved in low CO2-inducible, high affinity CO2 uptake                           |
| SH1735 | 0.713 | 0.692 | 0.274 | 0.290 | hypothetical protein                                                                      |
| SH1737 | 0.819 | 1.130 | 0.957 | 1.193 | hypothetical protein YCF60                                                                |
| SH1738 | 1.178 | 0.824 | 0.725 | 0.693 | hypothetical protein                                                                      |
| SH1739 | 1.009 | 1.418 | 1.522 | 2.336 | unknown protein                                                                           |
| SH1740 | 1.203 | 1.387 | 2.793 | 3.012 | 50S ribosomal protein L19                                                                 |
| SH1742 | 0.938 | 0.943 | 0.786 | 0.850 | transcription antitermination protein NusG                                                |
| SH1743 | 1.802 | 1.667 | 1.587 | 1.305 | 50S ribosomal protein L11                                                                 |
| SH1744 | 1.160 | 1.353 | 1.603 | 1.838 | 50S ribosomal protein L1                                                                  |
| SH1745 | 1.062 | 0.925 | 1.119 | 1.041 | 50S ribosomal protein L10                                                                 |
| SH1746 | 0.946 | 0.725 | 0.985 | 0.697 | 50S ribosomal protein L12                                                                 |
| SH1747 | 0.968 | 0.833 | 0.797 | 0.696 | chorismate synthase                                                                       |
| SH1750 | 0.929 | 1.058 | 1.003 | 1.168 | urease alpha subunit                                                                      |
| SH1750 | 0.929 | 1.058 | 1.003 | 1.168 | urease alpha subunit                                                                      |
| SH1752 | 1.658 | 1.546 | 1.106 | 1.087 | hypothetical protein                                                                      |
| SH1757 | 1.081 | 1.314 | 0.655 | 0.669 | hypothetical protein                                                                      |
| SH1758 | 1.031 | 1.056 | 1.898 | 2.033 | MrsA protein homolog                                                                      |
| SH1760 | 0.665 | 0.399 | 0.664 | 0.296 | homoserine kinase                                                                         |
| SH1762 | 1.036 | 1.333 | 0.644 | 0.787 | periplasmic protein, putative polar amino acid transport system substrate-binding protein |
| SH1767 | 0.975 | 1.115 | 0.578 | 0.607 | 30S ribosomal protein S6                                                                  |
| SH1768 | 0.844 | 0.313 | 0.763 | 0.326 | probable oligopeptides ABC transporter permease protein                                   |
| SH1769 | 1.153 | 1.420 | 0.783 | 0.873 | hypothetical protein                                                                      |
| SH1770 | 1.143 | 1.531 | 1.280 | 1.645 | hypothetical protein                                                                      |
| SH1771 | 0.820 | 0.894 | 0.798 | 0.958 | protein serin-threonin phosphatase                                                        |
| SH1772 | 1.083 | 1.563 | 0.952 | 1.447 | DNA mismatch repair protein MutS                                                          |
| SH1773 | 1.451 | 1.972 | 0.949 | 1.239 | hypothetical protein                                                                      |
| SH1774 | 0.963 | 1.408 | 0.870 | 1.256 | hypothetical protein                                                                      |
| SH1775 | 0.829 | 0.975 | 1.122 | 1.179 | hypothetical protein                                                                      |
| SH1776 | 0.883 | 0.989 | 0.689 | 0.729 | deoxyribose-phosphate aldolase                                                            |
| SH1776 | 0.883 | 0.989 | 0.689 | 0.729 | deoxyribose-phosphate aldolase                                                            |
| SH1783 | 0.835 | 0.540 | 1.019 | 0.591 | hypothetical protein                                                                      |
| SH1784 | 0.617 | 0.508 | 0.591 | 0.512 | periplasmic protein, function unknown                                                     |
| SH1785 | 0.611 | 0.716 | 0.546 | 0.617 | periplasmic protein, function unknown                                                     |
| SH1786 | 0.756 | 0.859 | 0.693 | 0.722 | putative deoxyribonuclease, tatD homolog                                                  |
| SH1787 | 0.975 | 1.080 | 1.695 | 1.764 | RNA polymerase beta subunit                                                               |
| SH1789 | 0.952 | 1.002 | 1.220 | 1.355 | RNA polymerase beta prime subunit                                                         |
| SH1796 | 0.510 | 0.352 | 0.850 | 0.636 | cytochrome c553                                                                           |
| SH1797 | 1.016 | 1.418 | 0.888 | 1.236 | hypothetical protein YCF21                                                                |
| SH1799 | 1.193 | 1.661 | 1.852 | 2.660 | 50S ribosomal protein L3                                                                  |
| SH1800 | 1.033 | 1.441 | 4.587 | 6.849 | 50S ribosomal protein L4                                                                  |
| SH1801 | 1.575 | 1.698 | 5.618 | 5.650 | 50S ribosomal protein L23                                                                 |
| SH1802 | 1.484 | 0.761 | 2.101 | 1.105 | 50S ribosomal protein L2                                                                  |
| SH1803 | 0.980 | 1.279 | 2.681 | 3.289 | 50S ribosomal protein L22                                                                 |
| SH1804 | 1.318 | 1.359 | 2.532 | 2.381 | 30S ribosomal protein S3                                                                  |
| SH1805 | 1.062 | 1.192 | 1.036 | 1.148 | 50S ribosomal protein L16                                                                 |
| SH1806 | 1.092 | 0.837 | 1.821 | 1.541 | 50S ribosomal protein L14                                                                 |
| SH1807 | 1.121 | 1.949 | 0.968 | 1.330 | 50S ribosomal protein L24                                                                 |
| SH1808 | 1.119 | 1.238 | 3.135 | 3.268 | 50S ribosomal protein L5                                                                  |
| SH1809 | 1.143 | 1.443 | 2.151 | 2.950 | 30S ribosomal protein S8                                                                  |
| SH1810 | 1.639 | 1.761 | 2.045 | 1.776 | 50S ribosomal protein L6                                                                  |
| SH1811 | 1.637 | 1.908 | 2.513 | 3.021 | 50S ribosomal protein L18                                                                 |
| SH1812 | 1.418 | 2.101 | 1.727 | 2.545 | 30S ribosomal protein S5                                                                  |
| SH1813 | 1.189 | 1.269 | 2.439 | 3.436 | 50S ribosomal protein L15                                                                 |
| SH1814 | 0.880 | 0.661 | 0.712 | 0.628 | preprotein translocase SecY subunit                                                       |
| SH1815 | 0.895 | 0.901 | 0.985 | 0.917 | adenylate kinase                                                                          |
| SH1816 | 0.958 | 1.372 | 1.684 | 2.217 | 30S ribosomal protein S13                                                                 |
| SH1817 | 1.479 | 1.976 | 1.443 | 1.506 | 30S ribosomal protein S11                                                                 |
| SH1818 | 0.960 | 1.143 | 1.025 | 1.117 | RNA polymerase alpha subunit                                                              |
| SH1819 | 0.912 | 0.970 | 0.927 | 0.964 | 50S ribosomal protein L17                                                                 |
| SH1820 | 0.951 | 1.045 | 0.692 | 0.782 | tRNA pseudouridine synthase 1                                                             |
| SH1821 | 1.103 | 1.422 | 2.703 | 3.175 | 50S ribosomal protein L13                                                                 |
| SH1822 | 1.330 | 2.062 | 2.370 | 3.077 | 30S ribosomal protein S9                                                                  |
| SH1823 | 1.022 | 1.529 | 1.300 | 2.222 | adenylosuccinate synthetase                                                               |
| SH1825 | 1.110 | 1.312 | 0.625 | 0.908 | hypothetical protein                                                                      |
| SH1830 | 0.834 | 0.901 | 0.728 | 0.652 | unknown protein                                                                           |

|         |       |       |       |       |                                                                            |
|---------|-------|-------|-------|-------|----------------------------------------------------------------------------|
| SlI1831 | 0.800 | 0.392 | 1.318 | 0.476 | glycolate oxidase subunit, (Fe-S)protein                                   |
| SlI1833 | 0.833 | 1.247 | 0.616 | 0.950 | penicillin-binding protein                                                 |
| SlI1835 | 0.797 | 0.769 | 0.943 | 0.970 | periplasmic protein, function unknown                                      |
| SlI1837 | 1.319 | 1.168 | 1.229 | 1.136 | periplasmic protein, function unknown                                      |
| SlI1841 | 1.100 | 0.902 | 1.385 | 1.196 | pyruvate dehydrogenase dihydrolipoamide acetyltransferase component (E2)   |
| SlI1848 | 1.124 | 1.079 |       |       | putative acyltransferase                                                   |
| SlI1852 | 1.302 | 1.934 | 0.496 | 0.676 | nucleoside diphosphate kinase                                              |
| SlI1852 | 1.302 | 1.934 | 0.496 | 0.676 | nucleoside diphosphate kinase                                              |
| SlI1854 | 0.905 | 0.932 | 0.639 | 0.783 | exodeoxyribonuclease III                                                   |
| SlI1862 | 3.774 | 2.392 | 2.674 | 1.792 | unknown protein                                                            |
| SlI1863 | 6.757 | 3.425 | 3.788 | 2.309 | unknown protein                                                            |
| SlI1865 | 1.238 | 1.486 | 0.574 | 0.892 | peptide chain release factor 2                                             |
| SlI1866 | 0.803 | 0.968 | 1.754 | 2.119 | hypothetical protein                                                       |
| SlI1870 | 0.730 | 0.743 | 0.687 | 0.719 | ATP-binding protein of ABC transporter                                     |
| SlI1871 | 0.896 | 1.013 | 0.922 | 0.692 | two-component system sensory histidine kinase                              |
| SlI1872 | 0.978 | 1.439 | 1.224 | 1.441 | transcriptional regulator                                                  |
| SlI1873 | 1.189 | 1.957 | 1.449 | 2.762 | unknown protein                                                            |
| SlI1878 | 0.563 | 0.686 | 0.912 | 0.947 | iron(III)-transport ATP-binding protein                                    |
| SlI1879 | 0.716 | 0.597 | 0.922 | 0.503 | two-component response regulator                                           |
| SlI1882 | 0.447 | 0.316 | 1.172 | 0.818 | unknown protein                                                            |
| SlI1883 | 1.057 | 0.870 | 1.305 | 1.057 | arginine biosynthesis bifunctional protein ArgJ                            |
| SlI1884 | 1.437 | 2.833 | 0.850 | 1.538 | hypothetical protein                                                       |
| SlI1885 | 1.075 | 0.845 | 0.874 | 0.699 | unknown protein                                                            |
| SlI1888 | 0.887 | 1.044 | 0.741 | 1.092 | two-component sensor histidine kinase                                      |
| SlI1891 | 1.255 | 2.227 | 1.949 | 3.378 | unknown protein                                                            |
| SlI1892 | 0.993 | 1.205 | 0.775 | 1.250 | unknown protein                                                            |
| SlI1893 | 0.657 | 0.792 | 0.702 | 0.864 | cyclase                                                                    |
| SlI1894 | 1.188 | 1.156 | 1.081 | 1.171 | riboflavin biosynthesis protein RibA                                       |
| SlI1895 | 1.202 | 1.524 | 0.914 | 1.252 | hypothetical protein                                                       |
| SlI1897 | 0.690 | 1.269 | 0.534 | 0.969 | hypothetical protein                                                       |
| SlI1902 | 0.884 | 1.015 | 0.946 | 0.911 | hypothetical protein                                                       |
| SlI1905 | 0.792 | 0.887 | 0.919 | 0.933 | two-component hybrid sensor and regulator                                  |
| SlI1908 | 0.948 | 0.840 | 1.017 | 0.852 | D-3-phosphoglycerate dehydrogenase                                         |
| SlI1909 | 0.661 | 0.610 | 0.775 | 0.547 | probable methyltransferase                                                 |
| SlI1910 | 0.980 | 1.036 | 0.993 | 1.005 | protein conferring resistance to acetazolamide Zam                         |
| SlI1911 | 1.497 | 1.486 | 0.799 | 1.153 | hypothetical protein                                                       |
| SlI1913 | 0.805 | 0.788 | 0.680 | 0.483 | hypothetical protein                                                       |
| SlI1917 | 1.192 | 0.965 | 2.012 | 1.610 | coproporphyrinogen III oxidase, anaerobic (oxygen-independent)             |
| SlI1920 | 1.134 | 1.340 | 0.999 | 1.091 | copper-transporting P-type ATPase PacS                                     |
| SlI1925 | 0.988 | 0.737 | 1.203 | 0.887 | hypothetical protein                                                       |
| SlI1927 | 0.880 | 0.957 | 0.943 | 1.035 | ABC transporter ATP-binding protein                                        |
| SlI1931 | 0.986 | 0.974 | 1.312 | 1.253 | serine hydroxymethyltransferase                                            |
| SlI1932 | 0.933 | 1.139 | 1.033 | 1.359 | DnaK protein                                                               |
| SlI1933 | 1.098 | 1.406 | 1.170 | 1.626 | DnaJ protein, heat shock protein 40, molecular chaperone                   |
| SlI1934 | 1.189 | 1.876 | 0.894 | 1.335 | hypothetical protein                                                       |
| SlI1937 | 0.756 | 1.131 | 0.732 | 0.947 | ferric uptake regulation protein                                           |
| SlI1938 | 0.807 | 0.991 | 0.681 | 0.728 | hypothetical protein                                                       |
| SlI1940 | 0.620 | 0.978 | 0.518 | 0.793 | hypothetical protein                                                       |
| SlI1941 | 0.990 | 1.119 | 0.991 | 1.259 | DNA gyrase A subunit                                                       |
| SlI1945 | 0.889 | 1.043 | 1.119 | 1.122 | 1-deoxyxylulose-5-phosphate synthase                                       |
| SlI1946 | 0.594 | 0.612 | 0.453 | 0.413 | hypothetical protein                                                       |
| SlI1949 | 0.763 | 0.746 | 0.608 | 0.589 | unknown protein                                                            |
| SlI1950 | 0.847 | 0.955 | 0.760 | 0.805 | unknown protein                                                            |
| SlI1951 | 1.062 | 0.600 | 0.582 | 0.394 | unknown protein                                                            |
| SlI1956 | 0.718 | 1.094 | 0.689 | 1.183 | hypothetical protein                                                       |
| SlI1957 | 0.835 | 0.691 | 1.212 | 1.142 | transcriptional regulator                                                  |
| SlI1958 | 0.825 | 0.916 | 0.890 | 1.014 | histidinol phosphate aminotransferase                                      |
| SlI1959 | 0.786 | 0.732 | 0.750 | 0.689 | probable inositol monophosphatase                                          |
| SlI1961 | 0.978 | 0.848 | 0.886 | 0.841 | hypothetical protein                                                       |
| SlI1967 | 1.015 | 1.414 | 1.490 | 1.942 | probable RNA methyltransferase                                             |
| SlI1971 | 1.274 | 0.771 | 0.917 | 0.548 | probable hexosyltransferase                                                |
| SlI1971 | 1.274 | 0.771 | 0.917 | 0.548 | probable hexosyltransferase                                                |
| SlI1973 | 0.695 | 0.870 | 1.130 | 1.395 | hypothetical protein                                                       |
| SlI1979 | 1.065 | 0.730 | 0.786 | 0.528 | hypothetical protein                                                       |
| SlI1980 | 0.847 | 1.110 | 0.961 | 1.134 | thiol:disulfide interchange protein TrxA                                   |
| SlI1981 | 0.804 | 0.951 | 0.850 | 0.973 | acetolactate synthase                                                      |
| SlI1981 | 0.804 | 0.951 | 0.850 | 0.973 | acetolactate synthase                                                      |
| SlI1987 | 0.879 | 0.732 | 1.050 | 0.868 | catalase peroxidase                                                        |
| SlI1988 | 1.558 | 1.799 | 1.543 | 1.637 | 33 kDa chaperonin                                                          |
| SlI1994 | 0.858 | 0.896 | 0.968 | 1.022 | porphobilinogen synthase (5-aminolevulinic acid dehydratase)               |
| SlI2001 | 1.178 | 1.321 | 0.978 | 0.908 | leucine aminopeptidase                                                     |
| SlI2002 | 0.845 | 0.734 | 1.043 | 0.881 | hypothetical protein                                                       |
| SlI2003 | 1.011 | 0.981 | 0.837 | 0.767 | hypothetical protein                                                       |
| SlI2005 | 1.003 | 1.025 | 1.071 | 1.104 | DNA gyrase B subunit [Contains: Ssp gyrB intein]                           |
| SlI2006 | 0.935 | 0.622 | 0.797 | 0.524 | hypothetical protein                                                       |
| SlI2009 | 1.174 | 1.580 | 1.139 | 1.623 | processing protease                                                        |
| SlI2010 | 0.775 | 0.853 | 0.974 | 0.987 | UDP-N-acetylmuramoylalanine--D-glutamate ligase                            |
| SlI2014 | 1.049 | 0.959 | 0.789 | 0.681 | sugar fermentation stimulation protein                                     |
| Slr0001 | 1.475 | 1.418 | 1.961 | 2.237 | hypothetical protein                                                       |
| Slr0006 | 1.013 | 0.870 | 0.431 | 0.433 | unknown protein                                                            |
| Slr0007 | 0.836 | 1.007 | 0.615 | 0.731 | probable sugar-phosphate nucleotidyltransferase                            |
| Slr0008 | 0.705 | 0.668 | 0.709 | 0.617 | carboxyl-terminal processing protease                                      |
| Slr0009 | 0.922 | 0.760 | 0.755 | 0.677 | ribulose biphosphate carboxylase large subunit                             |
| Slr0012 | 0.792 | 0.686 | 0.539 | 0.457 | ribulose biphosphate carboxylase small subunit                             |
| Slr0013 | 0.878 | 0.927 | 0.913 | 0.801 | hypothetical protein                                                       |
| Slr0015 | 0.676 | 0.869 | 0.648 | 0.752 | lipid A disaccharide synthase                                              |
| Slr0016 | 0.907 | 0.650 | 1.021 | 0.723 | hypothetical protein                                                       |
| Slr0017 | 1.025 | 1.103 | 0.920 | 1.136 | UDP-N-acetylglucosamine 1-carboxyvinyltransferase                          |
| Slr0018 | 0.932 | 1.019 | 0.730 | 0.791 | fumarase                                                                   |
| Slr0020 | 1.028 | 1.364 | 1.279 | 1.675 | DNA recombinase                                                            |
| Slr0021 | 1.299 | 1.905 | 1.527 | 2.283 | protease                                                                   |
| Slr0023 | 1.073 | 1.008 |       |       | unknown protein                                                            |
| Slr0031 | 1.181 | 1.156 | 0.899 | 0.876 | hypothetical protein                                                       |
| Slr0032 | 0.858 | 0.885 | 1.005 | 0.960 | probable branched-chain amino acid aminotransferase                        |
| Slr0033 | 1.297 | 1.005 | 1.212 | 1.060 | glutamyl-tRNA(Gln) amidotransferase subunit C                              |
| Slr0038 | 0.870 | 0.767 | 0.812 | 0.679 | hypothetical protein                                                       |
| Slr0039 | 0.814 | 0.801 | 0.836 | 0.935 | hypothetical protein                                                       |
| Slr0040 | 0.659 | 0.475 | 0.561 | 0.388 | bicarbonate transport system substrate-binding protein                     |
| Slr0042 | 0.852 | 0.648 | 0.501 | 0.373 | probable porin; major outer membrane protein                               |
| Slr0043 | 0.362 | 0.484 | 0.817 | 0.501 | bicarbonate transport system ATP-binding protein                           |
| Slr0049 | 1.000 | 1.445 | 1.653 | 2.632 | hypothetical protein                                                       |
| Slr0050 | 0.579 | 0.542 | 0.829 | 0.645 | hypothetical protein YCF56                                                 |
| Slr0051 | 0.678 | 0.880 | 0.644 | 0.805 | periplasmic beta-type carbonic anhydrase                                   |
| Slr0055 | 0.864 | 0.855 | 0.503 | 0.483 | anthranilate synthase component II                                         |
| Slr0056 | 1.205 | 1.333 | 0.931 | 0.935 | chlorophyll a synthase                                                     |
| Slr0058 | 1.285 | 1.044 | 1.215 | 1.060 | hypothetical protein                                                       |
| Slr0063 | 0.931 | 1.064 | 1.218 | 1.441 | pilus biogenesis protein homologous to general secretion pathway protein E |
| Slr0064 | 1.070 | 0.999 | 1.435 | 1.321 | hypothetical protein                                                       |
| Slr0065 | 0.829 | 0.786 | 1.037 | 0.970 | hypothetical protein                                                       |
| Slr0066 | 0.641 | 0.739 | 0.717 | 0.815 | riboflavin biosynthesis protein RibD                                       |
| Slr0067 | 0.962 | 0.728 | 0.842 | 0.563 | MRP protein homolog                                                        |
| Slr0070 | 0.814 | 0.962 | 0.972 | 1.124 | methionyl-tRNA formyltransferase                                           |
| Slr0072 | 0.898 | 1.057 | 1.088 | 1.272 | glucose inhibited division protein B                                       |
| Slr0073 | 0.796 | 0.801 | 0.898 | 0.907 | two-component sensor histidine kinase                                      |
| Slr0074 | 1.114 | 1.057 | 0.948 | 1.068 | ABC transporter subunit                                                    |
| Slr0075 | 1.451 | 1.718 | 0.722 | 0.803 | ABC transporter ATP-binding protein                                        |
| Slr0076 | 1.171 | 1.129 | 0.929 | 0.849 | hypothetical protein                                                       |
| Slr0077 | 0.951 | 1.075 | 0.974 | 0.917 | cysteine desulfurase                                                       |
| Slr0078 | 0.924 | 2.525 | 0.887 | 1.736 | putative 6-pyruvoyl tetrahydrobiopterin synthase                           |
| Slr0079 | 0.705 | 0.653 | 0.887 | 0.765 | probable general secretion pathway protein E                               |
| Slr0080 | 1.346 | 1.381 | 2.119 | 1.427 | ribonuclease H                                                             |
| Slr0081 | 0.785 | 0.847 | 0.788 | 0.855 | two-component response regulator OmpR subfamily                            |
| Slr0082 | 1.119 | 0.889 | 1.020 | 0.826 | hypothetical protein                                                       |
| Slr0083 | 0.880 | 0.846 | 2.062 | 1.757 | RNA helicase Light                                                         |

|         |       |       |       |       |                                                                               |
|---------|-------|-------|-------|-------|-------------------------------------------------------------------------------|
| Slr0084 | 0.774 | 0.759 | 0.858 | 0.709 | amidotransferase HisH                                                         |
| Slr0086 | 0.911 | 1.120 | 0.864 | 1.176 | similar to DnaK protein                                                       |
| Slr0088 | 0.747 | 0.641 | 0.563 | 0.536 | beta-carotene ketolase                                                        |
| Slr0089 | 1.656 | 1.582 | 1.721 | 1.621 | gamma-tocopherol methyltransferase                                            |
| Slr0091 | 1.570 | 1.927 | 1.883 | 1.812 | aldehyde dehydrogenase                                                        |
| Slr0093 | 1.342 | 1.667 | 0.870 | 1.043 | DnaJ protein, heat shock protein 40, molecular chaperone                      |
| Slr0095 | 0.810 | 0.707 | 0.493 | 0.579 | O-methyltransferase                                                           |
| Slr0104 | 0.792 | 0.904 | 1.110 | 1.241 | hypothetical protein                                                          |
| Slr0106 | 0.873 | 0.290 | 1.299 | 0.242 | unknown protein                                                               |
| Slr0110 | 0.898 | 0.911 | 0.892 | 0.875 | hypothetical protein                                                          |
| Slr0111 | 0.399 | 0.297 | 0.569 | 0.538 | unknown protein                                                               |
| Slr0112 | 0.840 | 0.807 | 0.995 | 0.944 | unknown protein                                                               |
| Slr0115 | 0.935 | 0.929 | 0.741 | 0.747 | response regulator for energy transfer from phycobilisomes to photosystems    |
| Slr0116 | 0.993 | 0.990 | 0.743 | 0.617 | phycocyanobilin:ferredoxin oxidoreductase                                     |
| Slr0118 | 0.921 | 1.016 | 1.350 | 1.239 | thiamine biosynthesis protein ThiC                                            |
| Slr0120 | 0.982 | 0.971 | 0.573 | 0.668 | probable tRNA/rRNA methyltransferase                                          |
| Slr0121 | 0.990 | 1.114 | 1.232 | 1.368 | hypothetical protein                                                          |
| Slr0144 | 0.929 | 0.691 | 2.278 | 1.661 | hypothetical protein                                                          |
| Slr0145 | 0.759 | 0.441 | 1.093 | 0.744 | unknown protein                                                               |
| Slr0146 | 0.615 | 0.340 | 0.892 | 0.345 | hypothetical protein                                                          |
| Slr0147 | 0.839 | 0.595 | 3.215 | 2.000 | hypothetical protein                                                          |
| Slr0148 | 1.103 | 1.195 | 1.078 | 1.189 | hypothetical protein                                                          |
| Slr0149 | 0.813 | 0.510 | 1.144 | 0.733 | hypothetical protein                                                          |
| Slr0151 | 0.825 | 0.656 | 1.416 | 0.974 | unknown protein                                                               |
| Slr0152 | 0.775 | 0.858 | 0.686 | 0.750 | serine/threonine protein kinase                                               |
| Slr0156 | 0.853 | 0.894 | 0.825 | 0.865 | CtpB protein                                                                  |
| Slr0161 | 0.931 | 1.065 | 1.005 | 1.030 | twitching motility protein PilT                                               |
| Slr0163 | 0.883 | 1.016 | 1.374 | 1.376 | a part of pilC, pilin biogenesis protein, required for twitching motility     |
| Slr0164 | 0.963 | 1.024 | 0.887 | 1.074 | ATP-dependent Clp protease proteolytic subunit                                |
| Slr0165 | 0.967 | 1.012 | 0.602 | 0.680 | ATP-dependent Clp protease proteolytic subunit                                |
| Slr0168 | 0.824 | 1.217 | 0.692 | 0.862 | unknown protein                                                               |
| Slr0169 | 1.181 | 1.056 | 0.952 | 0.912 | hypothetical protein                                                          |
| Slr0171 | 1.125 | 1.515 | 2.710 | 2.717 | photosystem I assembly related protein Ycf37                                  |
| Slr0172 | 1.020 | 0.809 | 1.256 | 0.993 | hypothetical protein                                                          |
| Slr0181 | 1.007 | 2.488 | 0.524 | 1.276 | hypothetical protein                                                          |
| Slr0184 | 0.727 | 0.581 | 0.611 | 0.648 | unknown protein                                                               |
| Slr0185 | 1.054 | 2.336 | 0.578 | 1.222 | orotate phosphoribosyltransferase                                             |
| Slr0186 | 0.840 | 1.021 | 0.820 | 0.914 | 2-isopropylmalate synthase                                                    |
| Slr0191 | 1.066 | 1.136 | 1.318 | 1.164 | amidase enhancer, periplasmic protein                                         |
| Slr0192 | 1.477 | 1.757 | 0.865 | 1.555 | hypothetical protein                                                          |
| Slr0193 | 0.998 | 1.148 | 2.183 | 2.353 | RNA-binding protein                                                           |
| Slr0194 | 1.115 | 1.125 | 1.003 | 1.050 | ribose 5-phosphate isomerase                                                  |
| Slr0201 | 1.176 | 1.229 | 1.350 | 1.168 | heterodisulfide reductase subunit B                                           |
| Slr0207 | 1.195 | 1.147 | 1.018 | 1.193 | hypothetical protein                                                          |
| Slr0208 | 0.853 | 1.000 | 0.806 | 0.946 | hypothetical protein                                                          |
| Slr0209 | 0.891 | 0.838 | 0.845 | 0.840 | unknown protein                                                               |
| Slr0211 | 1.567 | 1.610 | 1.351 | 1.370 | hypothetical protein                                                          |
| Slr0212 | 0.939 | 0.949 | 1.060 | 1.107 | 5-methyltetrahydrofolate--homocysteine methyltransferase                      |
| Slr0213 | 0.705 | 0.964 | 1.065 | 1.279 | GMP synthetase                                                                |
| Slr0217 | 0.688 | 0.838 | 0.551 | 0.557 | hypothetical protein                                                          |
| Slr0220 | 1.050 | 1.050 | 1.112 | 1.103 | glycyl-tRNA synthetase beta chain                                             |
| Slr0222 | 1.040 | 0.705 | 1.019 | 0.693 | two-component hybrid sensor and regulator                                     |
| Slr0226 | 0.827 | 1.029 | 0.746 | 1.188 | unknown protein                                                               |
| Slr0228 | 1.124 | 0.849 | 1.193 | 1.082 | cell division protein FisH                                                    |
| Slr0229 | 0.615 | 0.675 | 0.980 | 1.121 | 3-hydroxyisobutyrate dehydrogenase                                            |
| Slr0233 | 0.826 | 0.709 | 0.582 | 0.490 | thioredoxin M                                                                 |
| Slr0236 | 0.867 | 0.968 | 0.759 | 0.763 | similar to glutathione S-transferase                                          |
| Slr0237 | 1.145 | 1.401 | 1.054 | 1.074 | glycogen operon protein GlgX homolog                                          |
| Slr0238 | 0.915 | 0.620 | 0.658 | 0.382 | hypothetical protein                                                          |
| Slr0239 | 0.867 | 1.155 | 1.029 | 1.121 | precorrin-4 C11-methyltransferase                                             |
| Slr0239 | 0.867 | 1.155 | 1.029 | 1.121 | precorrin-4 C11-methyltransferase                                             |
| Slr0242 | 0.912 | 0.582 | 1.558 | 1.232 | bacterioferritin comigratory protein homolog                                  |
| Slr0244 | 0.932 | 0.887 | 1.575 | 1.346 | hypothetical protein                                                          |
| Slr0245 | 0.646 | 0.671 | 0.661 | 0.615 | Histone deacetylase family protein                                            |
| Slr0249 | 0.555 | 0.438 | 0.677 | 0.527 | hypothetical protein                                                          |
| Slr0250 | 0.961 | 0.819 | 1.116 | 1.046 | hypothetical protein                                                          |
| Slr0251 | 1.143 | 1.151 | 0.813 | 0.880 | ATP-binding protein of ABC transporter                                        |
| Slr0254 | 0.777 | 0.634 | 0.641 | 0.555 | hypothetical protein                                                          |
| Slr0257 | 0.737 | 0.671 | 0.995 | 0.843 | periplasmic carboxyl-terminal protease                                        |
| Slr0260 | 1.112 | 1.464 | 1.718 | 2.193 | cob(J)alamin adenosyltransferase                                              |
| Slr0261 | 1.064 | 1.185 | 0.711 | 0.737 | NADH dehydrogenase subunit 7                                                  |
| Slr0261 | 1.064 | 1.185 | 0.711 | 0.737 | NADH dehydrogenase subunit 7                                                  |
| Slr0262 | 0.759 | 0.870 | 1.175 | 1.350 | unknown protein                                                               |
| Slr0267 | 1.208 | 1.135 | 1.149 | 1.124 | hypothetical protein                                                          |
| Slr0280 | 1.057 | 1.130 | 1.047 | 1.007 | hypothetical protein                                                          |
| Slr0287 | 1.109 | 1.499 | 2.012 | 2.681 | hypothetical protein                                                          |
| Slr0288 | 1.139 | 1.167 | 1.916 | 1.876 | glutamate--ammonia ligase                                                     |
| Slr0288 | 1.139 | 1.167 | 1.916 | 1.876 | glutamate--ammonia ligase                                                     |
| Slr0291 | 1.022 | 0.773 | 0.744 | 0.556 | hypothetical protein                                                          |
| Slr0293 | 1.116 | 1.495 | 0.853 | 1.152 | glycine dehydrogenase                                                         |
| Slr0298 | 0.908 | 0.651 | 0.646 | 0.444 | FraH protein homolog                                                          |
| Slr0300 | 1.176 | 1.160 | 0.985 | 1.043 | hypothetical protein                                                          |
| Slr0301 | 0.633 | 0.610 | 0.820 | 0.723 | phosphoenolpyruvate synthase                                                  |
| Slr0302 | 0.785 | 0.791 | 0.565 | 0.450 | unknown protein                                                               |
| Slr0303 | 1.259 | 1.399 | 1.488 | 1.727 | hypothetical protein                                                          |
| Slr0306 | 0.792 | 0.781 | 0.644 | 0.628 | unknown protein                                                               |
| Slr0312 | 1.170 | 1.218 | 0.938 | 1.082 | two-component response regulator NarL subfamily                               |
| Slr0315 | 1.543 | 1.675 | 1.054 | 1.131 | probable oxidoreductase                                                       |
| Slr0317 | 1.020 | 0.853 | 0.867 | 0.920 | hypothetical protein                                                          |
| Slr0319 | 2.193 | 1.912 | 1.462 | 1.312 | beta-lactamase                                                                |
| Slr0320 | 1.096 | 1.229 | 1.143 | 1.264 | hypothetical protein                                                          |
| Slr0321 | 0.927 | 0.887 | 1.179 | 0.943 | GTP-binding protein ERA homolog                                               |
| Slr0322 | 0.842 | 0.786 | 1.195 | 1.318 | two-component hybrid sensor and regulator                                     |
| Slr0322 | 0.842 | 0.786 | 1.195 | 1.318 | two-component hybrid sensor and regulator                                     |
| Slr0323 | 0.944 | 1.088 | 0.701 | 0.805 | putative alpha-mannosidase                                                    |
| Slr0326 | 1.238 | 0.915 | 1.355 | 1.091 | hypothetical protein                                                          |
| Slr0329 | 0.790 | 0.691 | 0.739 | 0.637 | glucokinase                                                                   |
| Slr0331 | 0.943 | 1.122 | 0.496 | 0.675 | NADH dehydrogenase subunit 4 (involved in photosystem-1 cyclic electron flow) |
| Slr0331 | 0.943 | 1.122 | 0.496 | 0.675 | NADH dehydrogenase subunit 4 (involved in photosystem-1 cyclic electron flow) |
| Slr0333 | 0.474 | 0.584 | 0.649 | 0.623 | unknown protein                                                               |
| Slr0335 | 1.063 | 1.139 | 2.375 | 2.653 | phycobilisome core-membrane linker polypeptide                                |
| Slr0338 | 0.894 | 0.071 | 0.715 | 0.990 | probable oxidoreductase                                                       |
| Slr0342 | 1.105 | 0.796 | 1.176 | 0.887 | cytochrome b6                                                                 |
| Slr0343 | 1.550 | 1.295 | 2.469 | 1.587 | cytochrome b6-f complex subunit 4                                             |
| Slr0346 | 0.830 | 0.700 | 0.804 | 0.661 | ribonuclease III                                                              |
| Slr0348 | 1.072 | 1.041 | 1.167 | 1.091 | hypothetical protein                                                          |
| Slr0348 | 1.072 | 1.041 | 1.167 | 1.091 | hypothetical protein                                                          |
| Slr0348 | 1.072 | 1.041 | 1.167 | 1.091 | hypothetical protein                                                          |
| Slr0351 | 0.661 | 0.678 | 0.835 | 0.733 | hypothetical protein                                                          |
| Slr0354 | 0.745 | 0.537 | 0.750 | 0.512 | ATP-binding protein of ABC transporter                                        |
| Slr0355 | 1.215 | 0.995 | 1.416 | 1.138 | hypothetical protein                                                          |
| Slr0357 | 1.166 | 1.082 | 1.067 | 1.038 | histidyl-tRNA synthetase                                                      |
| Slr0361 | 1.269 | 1.199 | 1.058 | 0.912 | probable ribosomal large subunit pseudouridine synthase B                     |
| Slr0362 | 0.911 | 0.928 | 1.129 | 0.878 | hypothetical protein                                                          |
| Slr0366 | 1.938 | 2.801 | 0.464 | 0.845 | unknown protein                                                               |
| Slr0369 | 0.825 | 0.829 | 0.821 | 0.879 | RND multidrug efflux transporter                                              |
| Slr0370 | 0.923 | 1.082 | 0.949 | 1.067 | succinate-semialdehyde dehydrogenase (NADP+)                                  |
| Slr0373 | 1.209 | 1.230 | 1.600 | 1.266 | hypothetical protein                                                          |
| Slr0374 | 1.016 | 1.267 | 0.818 | 1.048 | hypothetical protein                                                          |
| Slr0376 | 0.997 | 1.842 | 1.290 | 2.967 | hypothetical protein                                                          |
| Slr0377 | 0.995 | 0.906 | 1.140 | 1.026 | unknown protein                                                               |
| Slr0378 | 0.824 | 0.915 | 0.739 | 0.737 | similar to 7-beta-(4-carboxybutanamido)cephalosporanic acid acylase           |
| Slr0379 | 0.801 | 1.168 | 0.781 | 1.224 | thymidylate kinase                                                            |
| Slr0380 | 0.805 | 0.905 | 1.149 | 1.681 | hypothetical protein                                                          |

|         |       |       |       |       |                                                                                     |
|---------|-------|-------|-------|-------|-------------------------------------------------------------------------------------|
| Slr0381 | 1.266 | 1.280 | 0.950 | 0.928 | lactoylglutathione lyase                                                            |
| Slr0384 | 1.247 | 1.052 | 1.244 | 1.138 | sulfoquinovosyldiacylglycerol biosynthesis protein SqdX                             |
| Slr0386 | 1.269 | 1.580 | 1.199 | 1.387 | unknown protein                                                                     |
| Slr0387 | 0.640 | 1.065 | 0.580 | 0.733 | cysteine desulfurase NiS                                                            |
| Slr0394 | 1.515 | 2.000 | 1.058 | 1.488 | phosphoglycerate kinase                                                             |
| Slr0397 | 0.781 | 0.683 | 0.674 | 0.631 | hypothetical protein                                                                |
| Slr0398 | 1.122 | 1.041 | 0.808 | 0.811 | unknown protein                                                                     |
| Slr0399 | 1.389 | 1.536 | 1.372 | 1.558 | chaperon-like protein for quinone binding in photosystem II                         |
| Slr0400 | 0.719 | 0.825 | 0.576 | 0.665 | hypothetical protein                                                                |
| Slr0401 | 0.614 | 0.666 | 0.741 | 0.876 | periplasmic polyamine-binding protein of ABC transporter                            |
| Slr0402 | 0.759 | 1.073 | 1.029 | 1.335 | hypothetical protein                                                                |
| Slr0404 | 1.387 | 1.267 | 2.033 | 1.546 | hypothetical protein                                                                |
| Slr0406 | 0.876 | 0.943 | 0.777 | 0.779 | dihydroorotase                                                                      |
| Slr0415 | 1.395 | 1.534 | 1.412 | 1.435 | Na <sup>+</sup> /H <sup>+</sup> antiporter                                          |
| Slr0416 | 1.038 | 1.287 | 0.833 | 0.948 | unknown protein                                                                     |
| Slr0417 | 0.944 | 0.974 | 1.245 | 1.115 | DNA gyrase subunit A                                                                |
| Slr0418 | 1.120 | 1.107 | 1.258 | 1.227 | putative transcription factor DevT homolog                                          |
| Slr0420 | 1.250 | 0.907 | 0.844 | 0.634 | hypothetical protein                                                                |
| Slr0423 | 1.825 | 1.321 | 1.427 | 1.020 | hypothetical protein                                                                |
| Slr0426 | 0.819 | 0.816 | 0.654 | 0.637 | GTP cyclohydrolase I                                                                |
| Slr0427 | 0.854 | 0.661 | 0.869 | 0.639 | putative competence-damage protein                                                  |
| Slr0431 | 1.044 | 1.068 | 0.489 | 0.542 | hypothetical protein                                                                |
| Slr0434 | 1.143 | 0.700 | 1.538 | 1.049 | elongation factor P                                                                 |
| Slr0435 | 0.897 | 0.890 | 0.982 | 0.985 | biotin carboxyl carrier protein of acetyl-CoA carboxylase                           |
| Slr0436 | 1.005 | 0.889 | 0.972 | 0.504 | carbon dioxide concentrating mechanism protein CcmO                                 |
| Slr0439 | 0.601 | 0.590 | 0.772 | 0.660 | unknown protein                                                                     |
| Slr0440 | 0.722 | 0.747 | 0.668 | 0.688 | hypothetical protein                                                                |
| Slr0442 | 1.145 | 1.443 | 1.119 | 1.348 | unknown protein                                                                     |
| Slr0443 | 0.944 | 0.685 | 0.745 | 0.552 | hypothetical protein                                                                |
| Slr0444 | 1.000 | 1.114 | 0.960 | 1.062 | 3-phosphoshikimate 1-carboxyvinyltransferase                                        |
| Slr0446 | 0.698 | 0.816 | 0.876 | 0.554 | DNA polymerase III delta' subunit                                                   |
| Slr0447 | 0.733 | 0.853 | 0.760 | 0.823 | periplasmic protein, ABC-type urea transport system substrate-binding protein       |
| Slr0448 | 0.865 | 0.547 | 1.362 | 0.749 | DNA repair protein RadA                                                             |
| Slr0451 | 0.790 | 0.914 | 1.238 | 1.239 | putative helicase                                                                   |
| Slr0452 | 0.851 | 0.793 | 1.099 | 0.940 | dihydroxyacid dehydratase                                                           |
| Slr0453 | 1.041 | 1.701 | 0.633 | 1.020 | hypothetical protein                                                                |
| Slr0454 | 1.052 | 0.749 | 0.977 | 0.681 | RND multidrug efflux transporter                                                    |
| Slr0455 | 1.233 | 0.972 | 1.115 | 0.929 | hypothetical protein                                                                |
| Slr0457 | 1.140 | 1.253 | 0.920 | 0.961 | tRNA pseudouridine synthase B                                                       |
| Slr0458 | 1.330 | 1.284 | 0.801 | 0.781 | unknown protein                                                                     |
| Slr0467 | 0.654 | 0.701 | 0.608 | 1.117 | conserved component of ABC transporter for natural amino acids                      |
| Slr0468 | 0.809 | 1.080 | 1.259 | 1.894 | unknown protein                                                                     |
| Slr0469 | 1.050 | 0.862 | 2.532 | 1.515 | 30S ribosomal protein S4                                                            |
| Slr0473 | 0.519 | 0.548 | 0.818 | 0.772 | cyanobacterial phytochrome 1, two-component sensor histidine kinase                 |
| Slr0474 | 0.777 | 0.552 | 0.680 | 0.497 | two-component response regulator CheY subfamily, regulator for phytochrome 1 (Cph1) |
| Slr0476 | 1.085 | 1.211 | 0.939 | 0.805 | unknown protein                                                                     |
| Slr0477 | 0.808 | 0.743 | 0.533 | 0.675 | phosphoribosylglycinamide formyltransferase                                         |
| Slr0479 | 0.666 | 0.895 | 0.457 | 0.587 | hypothetical protein                                                                |
| Slr0480 | 0.856 | 1.172 | 0.916 | 0.805 | hypothetical protein YCF46                                                          |
| Slr0482 | 1.015 | 0.967 | 0.752 | 0.708 | unknown protein                                                                     |
| Slr0483 | 1.195 | 0.967 | 1.209 | 1.008 | hypothetical protein                                                                |
| Slr0484 | 0.831 | 0.862 | 1.266 | 1.205 | two-component sensor histidine kinase                                               |
| Slr0493 | 1.332 | 1.582 | 0.992 | 1.163 | similar to mannose-1-phosphate guanylyltransferase                                  |
| Slr0502 | 1.425 | 1.431 | 1.821 | 2.336 | cobalamin synthesis protein cobW homolog                                            |
| Slr0503 | 0.742 | 0.738 | 0.859 | 0.356 | hypothetical protein YCF66                                                          |
| Slr0506 | 1.079 | 1.037 | 2.532 | 2.123 | light-dependent NADPH-protochlorophyllide oxidoreductase                            |
| Slr0506 | 1.079 | 1.037 | 2.532 | 2.123 | light-dependent NADPH-protochlorophyllide oxidoreductase                            |
| Slr0513 | 0.281 | 0.201 | 0.589 | 0.405 | iron transport system substrate-binding protein, periplasmic protein                |
| Slr0516 | 1.852 | 1.488 | 1.383 | 1.179 | hypothetical protein                                                                |
| Slr0518 | 1.014 | 1.053 | 1.095 | 1.075 | similar to alpha-L-arabinofuranosidase B                                            |
| Slr0519 | 0.697 | 0.886 | 0.688 | 0.864 | hypothetical protein                                                                |
| Slr0520 | 0.921 | 0.939 | 0.911 | 0.796 | phosphoribosyl formylglycinamide synthase                                           |
| Slr0523 | 1.139 | 0.983 | 1.170 | 0.934 | similar to dethiobiotin synthetase                                                  |
| Slr0525 | 1.074 | 1.279 | 1.348 | 1.504 | Mg-protoporphyrin IX methyl transferase                                             |
| Slr0526 | 0.826 | 0.971 | 0.951 | 0.657 | 3-methyl-2-oxobutanoate hydroxymethyltransferase                                    |
| Slr0527 | 0.935 | 1.050 | 0.831 | 0.806 | transcription regulator ExsB homolog                                                |
| Slr0528 | 0.941 | 1.092 | 1.408 | 1.374 | UDP-N-acetylmuramoylalanine-D-glutamate--2, 6-diaminopimelate ligase                |
| Slr0529 | 1.848 | 1.745 | 1.456 | 1.451 | glucosylglycerol transport system substrate-binding protein                         |
| Slr0534 | 0.999 | 1.202 | 1.063 | 0.994 | probable transglycosylase                                                           |
| Slr0535 | 0.833 | 0.924 | 1.099 | 1.307 | protease                                                                            |
| Slr0536 | 0.998 | 0.985 | 0.917 | 0.790 | uroporphyrinogen decarboxylase                                                      |
| Slr0537 | 1.167 | 1.142 | 1.992 | 2.110 | putative sugar kinase                                                               |
| Slr0541 | 1.011 | 1.435 | 0.702 | 1.104 | probable amidotransferase                                                           |
| Slr0542 | 1.047 | 1.027 | 0.927 | 0.863 | ATP-dependent protease ClpP                                                         |
| Slr0543 | 1.001 | 1.057 | 1.425 | 1.174 | tryptophan synthase beta subunit                                                    |
| Slr0546 | 1.048 | 1.164 | 0.952 | 1.147 | indole-3-glycerol phosphate synthase                                                |
| Slr0549 | 1.082 | 1.095 | 1.035 | 1.050 | aspartate beta-semialdehyde dehydrogenase                                           |
| Slr0550 | 1.020 | 0.985 | 1.065 | 0.806 | dihydropicolinate synthase                                                          |
| Slr0551 | 1.285 | 1.348 | 1.592 | 1.631 | hypothetical protein                                                                |
| Slr0552 | 1.203 | 1.385 | 1.075 | 1.245 | hypothetical protein                                                                |
| Slr0553 | 0.782 | 0.765 | 0.806 | 0.746 | hypothetical protein                                                                |
| Slr0556 | 1.037 | 0.962 | 0.804 | 0.584 | hypothetical protein                                                                |
| Slr0557 | 1.058 | 1.055 | 1.217 | 1.233 | valyl-tRNA synthetase                                                               |
| Slr0559 | 1.479 | 1.953 | 0.876 | 1.026 | periplasmic binding protein of ABC transporter for natural amino acids              |
| Slr0565 | 1.271 | 1.422 | 1.504 | 1.783 | hypothetical protein                                                                |
| Slr0569 | 0.973 | 0.611 | 1.136 | 0.704 | unknown protein                                                                     |
| Slr0574 | 0.864 | 0.821 | 0.951 | 0.932 | cytochrome P450                                                                     |
| Slr0575 | 1.016 | 0.921 | 0.810 | 0.719 | hypothetical protein                                                                |
| Slr0580 | 0.918 | 0.711 | 0.913 | 0.794 | aluminum resistance protein homolog                                                 |
| Slr0581 | 1.019 | 0.887 | 0.787 | 0.676 | unknown protein                                                                     |
| Slr0583 | 0.814 | 1.002 | 0.815 | 0.939 | similar to GDP-fucose synthetase                                                    |
| Slr0585 | 0.945 | 1.082 | 0.899 | 1.082 | argininosuccinate synthetase                                                        |
| Slr0586 | 1.140 | 1.055 | 1.414 | 1.339 | hypothetical protein                                                                |
| Slr0588 | 0.927 | 0.940 | 0.778 | 0.831 | hypothetical protein                                                                |
| Slr0590 | 1.153 | 1.427 | 1.032 | 1.256 | hypothetical protein                                                                |
| Slr0591 | 0.973 | 0.871 | 1.149 | 0.932 | ribonucleoside-diphosphate reductase beta chain                                     |
| Slr0592 | 0.839 | 1.092 | 0.671 | 0.779 | hypothetical protein                                                                |
| Slr0594 | 0.838 | 0.851 | 0.984 | 1.043 | hypothetical protein                                                                |
| Slr0596 | 0.779 | 0.601 | 0.612 | 0.434 | hypothetical protein                                                                |
| Slr0597 | 1.073 | 0.907 | 1.186 | 1.130 | phosphoribosyl aminoimidazole carboxy formyl formyltransferase                      |
| Slr0598 | 1.010 | 1.064 | 0.953 | 0.879 | hypothetical protein                                                                |
| Slr0599 | 0.873 | 0.808 | 0.749 | 0.637 | serine/threonine kinase                                                             |
| Slr0600 | 1.144 | 1.425 | 1.107 | 1.376 | NADP-thioredoxin reductase                                                          |
| Slr0600 | 1.144 | 1.425 | 1.107 | 1.376 | NADP-thioredoxin reductase                                                          |
| Slr0601 |       | 0.691 |       | 1.912 | unknown protein                                                                     |
| Slr0603 | 0.709 | 0.945 | 0.858 | 0.820 | DNA polymerase III alpha subunit [Contains: Ssp dnaE intein]                        |
| Slr0604 | 1.196 | 1.404 | 1.372 | 1.590 | GTP-binding protein                                                                 |
| Slr0605 | 0.920 | 1.070 | 0.857 | 1.046 | hypothetical protein                                                                |
| Slr0606 | 0.971 | 1.287 | 0.859 | 1.232 | hypothetical protein                                                                |
| Slr0607 | 1.147 | 1.020 | 1.144 | 0.943 | hypothetical protein                                                                |
| Slr0608 | 1.018 | 1.101 | 1.080 | 1.193 | histidine biosynthesis bifunctional protein HisIE                                   |
| Slr0609 | 1.473 | 1.410 | 1.988 | 2.012 | hypothetical protein                                                                |
| Slr0613 | 1.217 | 1.129 | 1.684 | 1.645 | hypothetical protein                                                                |
| Slr0615 | 0.534 | 0.637 | 0.621 | 0.389 | ATP-binding protein of ABC transporter                                              |
| Slr0619 | 1.020 | 1.060 | 0.931 | 0.739 | hypothetical protein                                                                |
| Slr0623 | 0.810 | 0.801 | 1.159 | 1.263 | thioredoxin                                                                         |
| Slr0624 | 0.975 | 0.954 | 0.897 | 0.998 | UDP-N-acetylglucosamine 2-epimerase                                                 |
| Slr0625 | 0.693 | 0.719 | 0.886 | 0.907 | hypothetical protein                                                                |
| Slr0626 | 1.024 | 1.179 | 1.047 | 0.970 | probable glycosyltransferase                                                        |
| Slr0628 | 1.802 | 2.381 | 2.114 | 2.899 | 30S ribosomal protein S14                                                           |
| Slr0630 | 1.175 | 0.960 | 1.055 | 0.850 | hypothetical protein                                                                |
| Slr0633 | 1.235 | 1.261 | 0.938 | 1.156 | thiamine biosynthesis protein ThiG                                                  |
| Slr0634 | 0.879 | 0.963 | 0.627 | 0.706 | unknown protein                                                                     |
| Slr0635 | 0.905 | 0.997 | 0.577 | 0.566 | hypothetical protein                                                                |

|         |       |       |       |       |                                                                               |
|---------|-------|-------|-------|-------|-------------------------------------------------------------------------------|
| Slr0637 | 0.963 | 0.966 | 0.782 | 0.692 | hypothetical protein                                                          |
| Slr0638 | 0.951 | 0.935 | 0.994 | 0.883 | glycyl-tRNA synthetase alpha chain                                            |
| Slr0643 | 2.024 | 1.040 | 2.174 | 1.103 | hypothetical protein                                                          |
| Slr0645 | 1.114 | 1.704 | 0.728 | 1.037 | hypothetical protein                                                          |
| Slr0646 | 0.789 | 1.030 | 0.568 | 0.633 | probable D-alanyl-D-alanine carboxypeptidase                                  |
| Slr0649 | 0.845 | 1.224 | 0.921 | 1.190 | methionyl-tRNA synthetase                                                     |
| Slr0650 | 0.884 | 0.877 | 0.985 | 1.029 | hypothetical protein                                                          |
| Slr0651 | 1.050 | 1.307 | 1.109 | 1.025 | hypothetical protein                                                          |
| Slr0652 | 0.919 | 1.344 | 0.805 | 1.028 | phosphorylformimino-5-amino- phosphorybosal-4-imidazolecarboxamideisomerase   |
| Slr0653 | 1.044 | 0.995 | 2.242 | 2.604 | principal RNA polymerase sigma factor SigA                                    |
| Slr0654 | 0.763 | 0.359 | 1.422 | 0.660 | unknown protein                                                               |
| Slr0657 | 0.937 | 1.106 | 0.935 | 1.085 | aspartate kinase                                                              |
| Slr0658 | 0.782 | 0.876 | 0.991 | 0.922 | unknown protein                                                               |
| Slr0659 | 0.980 | 1.060 | 0.954 | 1.059 | oligopeptidase A                                                              |
| Slr0661 | 1.036 | 1.055 | 0.980 | 0.922 | pyrroline-5-carboxylate reductase                                             |
| Slr0662 | 0.894 | 0.858 | 0.758 | 0.799 | arginine decarboxylase                                                        |
| Slr0664 | 1.319 | 2.315 | 1.848 | 3.165 | hypothetical protein                                                          |
| Slr0665 | 1.078 | 1.112 | 2.008 | 2.141 | aconitate hydratase                                                           |
| Slr0666 | 0.954 | 0.907 | 0.938 | 0.902 | unknown protein                                                               |
| Slr0667 | 0.962 | 1.325 | 0.407 | 0.491 | unknown protein                                                               |
| Slr0670 | 0.907 | 0.720 | 1.004 | 0.735 | hypothetical protein                                                          |
| Slr0676 | 1.082 | 1.342 | 0.894 | 1.015 | adenylsulfate kinase                                                          |
| Slr0677 | 1.106 | 1.285 | 0.894 | 1.155 | biopolymer transport ExbB like protein                                        |
| Slr0678 | 1.041 | 1.425 | 1.429 | 1.931 | biopolymer transport ExbD like protein                                        |
| Slr0679 | 1.300 | 1.522 | 1.263 | 1.414 | sun protein                                                                   |
| Slr0681 | 0.982 | 0.642 | 0.787 | 0.635 | probable sodium/calcium exchanger protein                                     |
| Slr0682 | 0.853 | 1.124 | 0.628 | 0.631 | histidinol dehydrogenase                                                      |
| Slr0688 | 1.399 | 1.672 | 1.645 | 2.198 | hypothetical protein                                                          |
| Slr0689 | 1.174 | 1.475 | 0.550 | 0.479 | hypothetical protein                                                          |
| Slr0692 | 0.958 | 1.305 | 0.949 | 1.464 | hypothetical protein YCF45                                                    |
| Slr0695 | 0.961 | 0.955 | 0.947 | 1.259 | hypothetical protein                                                          |
| Slr0697 | 0.895 | 0.754 | 0.953 | 0.940 | 5-oxoprolinase homolog                                                        |
| Slr0698 | 1.127 | 1.250 | 0.793 | 0.869 | hypothetical protein                                                          |
| Slr0699 | 0.765 | 0.784 | 0.664 | 0.664 | unknown protein                                                               |
| Slr0707 | 0.852 | 1.106 | 1.130 | 1.335 | DNA polymerase I                                                              |
| Slr0708 | 0.585 | 0.748 | 0.419 | 0.492 | periplasmic protein, function unknown                                         |
| Slr0709 | 1.088 | 0.970 | 0.786 | 0.923 | hypothetical protein                                                          |
| Slr0710 | 0.958 | 0.897 | 1.020 | 0.867 | glutamate dehydrogenase (NADP+)                                               |
| Slr0711 | 0.816 | 1.600 | 0.769 | 1.385 | hypothetical protein                                                          |
| Slr0713 | 0.882 | 0.936 | 0.755 | 0.853 | tRNA-guanine transglycosylase                                                 |
| Slr0719 | 0.959 | 0.786 | 1.143 | 1.044 | unknown protein                                                               |
| Slr0721 | 0.669 | 0.845 | 0.641 | 0.753 | malic enzyme                                                                  |
| Slr0722 | 0.789 | 0.728 | 0.627 | 0.575 | hypothetical protein                                                          |
| Slr0723 | 0.786 | 0.719 | 0.840 | 0.786 | hypothetical protein                                                          |
| Slr0727 | 0.984 | 1.181 | 1.404 | 1.715 | unknown protein                                                               |
| Slr0729 | 1.517 | 0.722 | 1.905 | 0.765 | hypothetical protein                                                          |
| Slr0730 | 0.861 | 0.675 | 0.775 | 0.600 | hypothetical protein                                                          |
| Slr0731 | 1.058 | 1.289 | 0.950 | 1.038 | hypothetical protein                                                          |
| Slr0737 | 1.253 | 1.100 | 1.585 | 1.779 | photosystem I subunit II                                                      |
| Slr0738 | 0.845 | 0.769 | 1.163 | 0.928 | anthranilate synthetase alpha-subunit                                         |
| Slr0739 | 1.337 | 1.582 | 1.575 | 1.972 | geranylgeranyl pyrophosphate synthase                                         |
| Slr0739 | 1.337 | 1.582 | 1.575 | 1.972 | geranylgeranyl pyrophosphate synthase                                         |
| Slr0740 | 1.209 | 1.835 | 0.951 | 1.406 | hypothetical protein                                                          |
| Slr0741 | 0.538 | 0.386 | 0.341 | 0.366 | transcriptional regulator                                                     |
| Slr0742 | 1.093 | 1.212 | 0.984 | 1.143 | hypothetical protein                                                          |
| Slr0743 | 1.239 | 1.192 | 1.006 | 1.062 | similar to N utilization substance protein                                    |
| Slr0744 | 1.709 | 2.123 | 1.613 | 2.062 | translation initiation factor IF-2                                            |
| Slr0746 | 2.169 | 0.485 | 3.367 | 0.641 | glucosylglycerolphosphate phosphatase                                         |
| Slr0747 | 1.639 | 1.299 | 1.212 | 0.945 | glucosylglycerol transport system ATP-binding protein                         |
| Slr0748 | 1.316 | 1.179 | 1.043 | 0.951 | hypothetical protein                                                          |
| Slr0750 | 1.019 | 1.139 | 1.464 | 1.692 | light-independent protochlorophyllide reductase subunit ChIN                  |
| Slr0752 | 1.045 | 1.259 | 0.636 | 0.736 | enolase                                                                       |
| Slr0755 | 0.944 | 1.035 | 0.908 | 0.983 | hypothetical protein                                                          |
| Slr0756 | 1.048 | 1.706 | 1.232 | 2.028 | circadian clock protein KaiA homolog                                          |
| Slr0757 | 0.944 | 1.855 | 0.614 | 1.266 | circadian clock protein KaiB homolog                                          |
| Slr0758 | 1.074 | 1.550 | 0.856 | 1.176 | circadian clock protein KaiC homolog                                          |
| Slr0765 | 1.931 | 2.857 | 1.675 | 1.364 | hypothetical protein                                                          |
| Slr0769 | 0.490 | 0.771 | 1.522 | 2.564 | hypothetical protein                                                          |
| Slr0770 | 0.786 | 0.887 | 0.759 | 0.847 | hypothetical protein                                                          |
| Slr0771 | 0.705 | 1.072 | 0.667 | 1.001 | hypothetical protein                                                          |
| Slr0772 | 1.179 | 1.527 | 1.585 | 2.075 | light-independent protochlorophyllide reductase subunit ChIB                  |
| Slr0773 | 1.168 | 1.183 | 0.705 | 0.738 | hypothetical protein                                                          |
| Slr0774 | 1.031 | 0.976 | 1.443 | 1.408 | protein-export membrane protein SecD                                          |
| Slr0775 | 1.148 | 0.740 | 0.938 | 0.438 | protein-export membrane protein SecF                                          |
| Slr0776 | 1.168 | 1.212 | 1.115 | 1.192 | UDP-3-o-[3-hydroxymristoyl] glucosamine n-acyltransferase                     |
| Slr0780 | 0.758 | 0.835 | 0.730 | 0.671 | hypothetical protein                                                          |
| Slr0782 | 0.734 | 0.736 | 0.659 | 0.677 | putative flavin-containing monoamine oxidase                                  |
| Slr0783 | 1.078 | 1.174 | 0.957 | 0.986 | triosephosphate isomerase                                                     |
| Slr0798 | 0.148 | 0.165 | 0.316 | 0.317 | zinc-transporting P-type ATPase (zinc efflux pump) involved in zinc tolerance |
| Slr0804 | 0.357 | 0.348 | 1.276 | 1.145 | hypothetical protein                                                          |
| Slr0806 | 0.776 | 0.963 | 0.636 | 0.963 | probable D-alanyl-D-alanine carboxypeptidase                                  |
| Slr0807 | 0.890 | 0.812 | 0.850 | 0.936 | probable o-sialoglycoprotein endopeptidase                                    |
| Slr0808 | 0.847 | 0.751 | 0.911 | 1.007 | 16S rRNA processing protein RimM homolog                                      |
| Slr0809 | 0.910 | 1.200 | 0.940 | 1.081 | dTDP-glucose 4,6-dehydratase                                                  |
| Slr0812 | 1.094 | 1.111 | 0.534 | 0.561 | hypothetical protein                                                          |
| Slr0816 | 0.752 | 0.662 | 0.781 | 0.678 | hypothetical protein                                                          |
| Slr0818 | 0.687 | 0.789 | 0.739 | 0.850 | hypothetical protein                                                          |
| Slr0821 | 1.618 | 1.443 | 1.608 | 1.326 | hypothetical protein                                                          |
| Slr0823 | 1.040 | 0.975 | 1.284 | 1.176 | photosystem I assembly related protein                                        |
| Slr0825 | 0.730 | 1.074 | 0.818 | 1.115 | probable peptidase                                                            |
| Slr0833 | 1.030 | 1.081 | 1.049 | 0.966 | replicative DNA helicase [Contains: Ssp dnaB intein]                          |
| Slr0835 | 0.837 | 1.420 | 0.805 | 1.357 | MoxR protein homolog                                                          |
| Slr0836 | 1.111 | 1.198 | 0.866 | 1.086 | dTDP-glucose 4,6-dehydratase                                                  |
| Slr0838 | 1.095 | 0.656 | 1.010 | 0.532 | phosphoribosyl formylglycinamide cyclo-ligase                                 |
| Slr0839 | 0.959 | 0.800 | 1.425 | 0.943 | ferrochelatase                                                                |
| Slr0841 | 1.274 | 1.684 | 1.307 | 1.603 | periplasmic protein, function unknown                                         |
| Slr0842 | 0.722 | 0.905 | 0.767 | 0.962 | hypothetical protein                                                          |
| Slr0844 | 1.011 | 0.952 | 0.935 | 0.715 | NADH dehydrogenase subunit 5                                                  |
| Slr0844 | 1.011 | 0.952 | 0.935 | 0.715 | NADH dehydrogenase subunit 5                                                  |
| Slr0848 | 0.845 | 0.951 | 1.024 | 1.093 | hypothetical protein                                                          |
| Slr0854 | 0.993 | 1.292 | 1.028 | 1.280 | DNA photolyase                                                                |
| Slr0861 | 0.746 | 0.646 | 0.833 | 0.822 | glycinamide ribonucleotide transformylase                                     |
| Slr0862 | 0.777 | 0.664 | 0.838 | 0.708 | probable sugar kinase                                                         |
| Slr0863 | 1.033 | 0.985 | 0.942 | 0.929 | hypothetical protein                                                          |
| Slr0864 | 0.983 | 1.553 | 1.277 | 1.838 | ATP-binding protein of ABC transporter                                        |
| Slr0865 | 0.563 | 0.712 | 1.045 | 0.926 | hypothetical protein                                                          |
| Slr0867 | 0.855 | 0.922 | 0.733 | 0.694 | unknown protein                                                               |
| Slr0869 | 0.503 | 0.438 | 0.707 | 0.546 | hypothetical protein                                                          |
| Slr0872 | 0.808 | 1.473 | 0.964 | 1.669 | hypothetical protein                                                          |
| Slr0875 | 1.028 | 0.750 | 0.678 | 0.435 | large-conductance mechanosensitive channel                                    |
| Slr0876 | 1.377 | 1.062 | 2.242 | 1.695 | hypothetical protein                                                          |
| Slr0877 | 1.045 | 0.968 | 1.264 | 1.111 | glutamyl-tRNA(Gln) amidotransferase subunit A                                 |
| Slr0878 | 1.178 | 1.845 | 0.881 | 1.399 | hypothetical protein                                                          |
| Slr0879 | 0.842 | 0.941 | 1.004 | 0.872 | glycine decarboxylase complex H-protein                                       |
| Slr0882 | 1.339 | 1.280 | 1.404 | 1.364 | hypothetical protein YCF84                                                    |
| Slr0882 | 1.339 | 1.280 | 1.404 | 1.364 | hypothetical protein YCF84                                                    |
| Slr0884 | 1.105 | 1.344 | 0.956 | 1.274 | glyceraldehyde 3-phosphate dehydrogenase 1 (NAD+)                             |
| Slr0885 | 0.821 | 1.134 | 0.578 | 1.621 | hypothetical protein                                                          |
| Slr0886 | 0.936 | 1.075 | 0.705 | 0.862 | 3-oxoacyl-[acyl-carrier protein] reductase                                    |
| Slr0889 | 1.427 | 1.623 | 0.919 | 1.059 | hypothetical protein                                                          |
| Slr0891 | 1.052 | 0.881 | 0.767 | 0.741 | N-acetylmuramoyl-L-alanine amidase                                            |
| Slr0897 | 0.842 | 1.170 | 0.339 | 0.496 | probable endoglucanase                                                        |
| Slr0898 | 1.006 | 0.786 | 1.307 | 0.980 | ferredoxin-nitrite reductase                                                  |
| Slr0899 | 1.020 | 0.703 | 1.092 | 0.756 | cyanate lyase                                                                 |

|         |       |       |       |       |                                                                                      |
|---------|-------|-------|-------|-------|--------------------------------------------------------------------------------------|
| Slr0900 | 1.021 | 0.781 | 1.196 | 0.917 | molybdopterin biosynthesis MoeA protein                                              |
| Slr0903 | 1.074 | 0.809 | 1.142 | 0.849 | molybdopterin (MPT) converting factor, subunit 2                                     |
| Slr0904 | 0.681 | 0.805 | 1.166 | 1.055 | competence protein ComM homolog                                                      |
| Slr0906 | 0.896 | 0.879 | 1.269 | 1.215 | photosystem II core light harvesting protein                                         |
| Slr0907 | 0.870 | 0.964 | 0.749 | 0.903 | unknown protein                                                                      |
| Slr0909 | 0.874 | 1.420 | 0.965 | 1.258 | unknown protein                                                                      |
| Slr0912 | 0.893 | 1.018 | 0.637 | 0.685 | unknown protein                                                                      |
| Slr0913 | 0.803 | 0.845 | 0.600 | 0.623 | unknown protein                                                                      |
| Slr0914 | 0.734 | 0.888 | 0.661 | 0.803 | unknown protein                                                                      |
| Slr0917 | 0.895 | 0.726 | 0.537 | 0.476 | 7-keto-8-aminopelargonic acid synthetase                                             |
| Slr0918 | 1.025 | 1.011 | 1.543 | 1.675 | methionine aminopeptidase                                                            |
| Slr0920 | 1.030 | 1.094 | 0.705 | 0.656 | mutator MutT protein                                                                 |
| Slr0921 | 0.765 | 0.841 | 0.705 | 0.826 | hypothetical protein                                                                 |
| Slr0922 | 0.912 | 1.035 | 0.939 | 1.312 | peptidyl-tRNA hydrolase                                                              |
| Slr0923 | 1.000 | 0.802 | 1.376 | 1.099 | hypothetical protein YCF65                                                           |
| Slr0924 | 0.670 | 1.058 | 1.022 | 1.653 | periplasmic protein, function unknown                                                |
| Slr0925 | 1.056 | 0.931 | 0.908 | 0.889 | single-stranded DNA-binding protein                                                  |
| Slr0929 | 1.122 | 1.340 | 0.589 | 0.784 | chromosome partitioning protein, ParA family                                         |
| Slr0930 | 0.999 | 1.387 | 1.420 | 2.016 | hypothetical protein                                                                 |
| Slr0936 | 1.056 | 0.978 | 0.964 | 0.651 | nicotinate-nucleotide pyrophosphorylase                                              |
| Slr0937 | 0.881 | 0.671 | 1.289 | 1.200 | unknown protein                                                                      |
| Slr0938 | 1.036 | 1.063 | 1.140 | 1.127 | probable UDP-N-acetylmuramyl tripeptide synthetase                                   |
| Slr0940 | 1.190 | 1.190 | 1.451 | 1.427 | zeta-carotene desaturase                                                             |
| Slr0941 | 0.841 | 0.923 | 0.690 | 0.770 | hypothetical protein                                                                 |
| Slr0942 | 1.043 | 1.018 | 1.057 | 1.000 | alcohol dehydrogenase [NADP+]                                                        |
| Slr0943 | 0.994 | 1.117 | 1.134 | 1.124 | fructose-bisphosphate aldolase, class I                                              |
| Slr0944 | 0.708 | 0.364 | 0.148 | 0.075 | multidrug-e-flux transporter                                                         |
| Slr0945 | 0.696 | 0.786 | 0.131 | 0.065 | arsenical resistance protein ArsH homolog                                            |
| Slr0946 | 0.858 | 0.749 | 0.325 | 0.308 | arsenate reductase                                                                   |
| Slr0947 | 0.813 | 0.873 | 0.615 | 0.706 | response regulator for energy transfer from phycobilisomes to photosystems           |
| Slr0948 | 0.750 | 0.823 | 0.938 | 0.887 | hypothetical protein                                                                 |
| Slr0950 | 0.829 | 1.073 | 0.742 | 0.857 | hemolysin-like protein                                                               |
| Slr0951 | 0.971 | 1.148 | 0.791 | 0.923 | 4-diphosphocytidyl-2C-methyl-D-erythritol synthase                                   |
| Slr0952 | 1.468 | 1.953 | 1.117 | 1.730 | fructose-1,6-bisphosphatase                                                          |
| Slr0954 | 0.574 | 0.671 | 0.546 | 0.769 | hypothetical protein                                                                 |
| Slr0955 | 0.741 | 1.050 | 0.950 | 1.389 | probable tRNA/rRNA methyltransferase                                                 |
| Slr0958 | 1.121 | 1.149 | 1.340 | 1.277 | cysteinyI-tRNA synthetase                                                            |
| Slr0959 | 0.894 | 0.959 | 1.054 | 1.115 | hypothetical protein                                                                 |
| Slr0962 | 2.012 | 1.957 | 1.431 | 1.406 | unknown protein                                                                      |
| Slr0963 | 1.171 | 1.414 | 2.155 | 2.463 | ferredoxin-sulfite reductase                                                         |
| Slr0965 | 0.975 | 1.121 | 0.935 | 1.012 | DNA polymerase III beta subunit                                                      |
| Slr0966 | 0.843 | 0.853 | 0.906 | 0.956 | tryptophan synthase alpha chain                                                      |
| Slr0969 | 0.905 | 1.244 | 0.788 | 1.058 | precorrin methylase                                                                  |
| Slr0971 | 0.830 | 0.714 | 1.020 | 0.778 | hypothetical protein                                                                 |
| Slr0974 | 1.453 | 2.075 | 1.560 | 2.825 | initiation factor IF-3                                                               |
| Slr0983 | 0.817 | 0.677 | 0.989 | 0.625 | glucose-1-phosphate cytidylyltransferase                                             |
| Slr0984 | 0.779 | 0.906 | 0.749 | 0.673 | CDP-glucose 4,6-dehydratase                                                          |
| Slr0985 | 0.705 | 0.800 | 0.669 | 0.672 | dTDP-4-dehydrorhamnose 3,5-epimerase                                                 |
| Slr0989 | 0.919 | 1.126 | 1.129 | 1.536 | hypothetical protein                                                                 |
| Slr0990 | 0.916 | 0.806 | 1.174 | 1.031 | hypothetical protein                                                                 |
| Slr0992 | 1.183 | 1.353 | 1.299 | 1.538 | probable tRNA/rRNA methyltransferase                                                 |
| Slr0993 | 0.421 | 0.303 | 0.790 | 0.883 | putative peptidase                                                                   |
| Slr1020 | 0.902 | 0.794 | 0.808 | 0.759 | sulfolipid biosynthesis protein SqdB                                                 |
| Slr1022 | 0.728 | 0.819 | 0.810 | 1.059 | N-acetylornithine aminotransferase                                                   |
| Slr1024 | 1.242 | 1.789 | 1.139 | 1.667 | fibrillin                                                                            |
| Slr1030 | 1.745 | 1.887 | 2.012 | 2.004 | magnesium protoporphyrin IX chelatase subunit I                                      |
| Slr1031 | 1.209 | 1.302 | 1.274 | 1.395 | tyrosyl tRNA synthetase                                                              |
| Slr1033 | 0.961 | 0.575 | 0.964 | 0.617 | unknown protein                                                                      |
| Slr1034 | 1.017 | 0.772 | 0.885 | 0.759 | hypothetical protein YCF41                                                           |
| Slr1035 | 1.502 | 1.114 | 1.170 | 0.633 | hypothetical protein                                                                 |
| Slr1037 | 0.657 | 1.002 | 0.509 | 0.842 | two-component response regulator CheY subfamily                                      |
| Slr1037 | 0.657 | 1.002 | 0.509 | 0.842 | two-component response regulator CheY subfamily                                      |
| Slr1039 | 1.232 | 1.531 | 0.785 | 0.964 | hypothetical protein                                                                 |
| Slr1041 | 1.031 | 1.004 | 0.965 | 1.078 | two-component response regulator PatA subfamily                                      |
| Slr1042 | 1.004 | 0.873 | 1.185 | 1.107 | two-component response regulator CheY subfamily                                      |
| Slr1043 | 0.769 | 0.823 | 0.784 | 0.692 | similar to chemotaxis protein CheW                                                   |
| Slr1044 | 0.773 | 0.799 | 0.778 | 0.721 | methyl-accepting chemotaxis protein, required for the biogenesis of thick pili       |
| Slr1048 | 0.841 | 0.923 | 1.250 | 1.337 | hypothetical protein                                                                 |
| Slr1056 | 0.736 | 0.911 | 1.698 | 1.664 | unknown protein                                                                      |
| Slr1063 | 0.822 | 0.753 | 0.687 | 0.431 | probable glycosyltransferase                                                         |
| Slr1064 | 0.934 | 1.099 | 1.289 | 1.637 | probable glycosyltransferase                                                         |
| Slr1065 | 0.865 | 0.839 | 0.856 | 0.855 | probable glycosyltransferase                                                         |
| Slr1066 | 0.790 | 1.156 | 0.984 | 1.225 | unknown protein                                                                      |
| Slr1067 | 0.861 | 0.974 | 0.840 | 0.995 | UDP-glucose 4-epimerase                                                              |
| Slr1073 | 0.890 | 0.631 | 0.659 | 0.612 | unknown protein                                                                      |
| Slr1076 | 0.844 | 0.861 | 0.606 | 0.758 | probable glycosyltransferase                                                         |
| Slr1087 | 0.919 | 1.572 | 0.363 | 0.613 | hypothetical protein                                                                 |
| Slr1090 | 0.719 | 0.795 | 0.806 | 0.951 | GTP-binding protein                                                                  |
| Slr1096 | 1.110 | 1.066 | 1.167 | 1.107 | dihydroipoamide dehydrogenase                                                        |
| Slr1097 | 1.083 | 0.969 | 1.040 | 1.007 | hypothetical protein                                                                 |
| Slr1098 | 0.792 | 0.664 | 0.882 | 1.022 | hypothetical protein                                                                 |
| Slr1098 | 0.792 | 0.664 | 0.882 | 1.022 | hypothetical protein                                                                 |
| Slr1099 | 0.864 | 0.841 | 0.669 | 0.644 | 3-octaprenyl-4-hydroxybenzoate carboxy-lyase                                         |
| Slr1100 | 1.130 | 1.022 | 1.147 | 1.316 | hypothetical protein                                                                 |
| Slr1101 | 0.737 | 0.767 | 1.050 | 0.833 | hypothetical protein                                                                 |
| Slr1102 | 0.727 | 0.699 | 0.983 | 0.903 | hypothetical protein                                                                 |
| Slr1103 | 0.727 | 0.677 | 0.929 | 0.786 | hypothetical protein                                                                 |
| Slr1104 | 0.679 | 0.701 | 0.742 | 0.638 | hypothetical protein                                                                 |
| Slr1105 | 1.548 | 1.832 | 1.802 | 2.212 | GTP-binding protein TypA/BipA homolog                                                |
| Slr1106 | 1.266 | 1.495 | 0.847 | 1.056 | prohibitin                                                                           |
| Slr1109 | 0.751 | 0.840 | 0.694 | 0.738 | similar to ankyrin                                                                   |
| Slr1110 | 0.469 | 0.521 | 0.574 | 0.486 | hypothetical protein                                                                 |
| Slr1116 | 0.871 | 1.075 | 0.543 | 0.561 | hypothetical protein                                                                 |
| Slr1117 | 0.890 | 0.888 | 0.876 | 0.999 | hypothetical protein                                                                 |
| Slr1123 | 0.881 | 0.900 | 0.804 | 0.649 | guanylate kinase                                                                     |
| Slr1124 | 0.985 | 0.806 | 0.896 | 0.729 | phosphoglycerate mutase                                                              |
| Slr1125 | 0.726 | 0.675 | 0.649 | 0.680 | probable glucosyl transferase                                                        |
| Slr1127 | 0.787 | 1.046 | 0.221 | 0.307 | unknown protein                                                                      |
| Slr1128 | 0.932 | 1.010 | 1.043 | 1.209 | hypothetical protein                                                                 |
| Slr1129 | 0.832 | 0.850 | 1.282 | 1.328 | ribonuclease E                                                                       |
| Slr1133 | 0.880 | 1.119 | 0.723 | 0.891 | L-argininosuccinate lyase                                                            |
| Slr1139 | 0.983 | 0.840 | 1.101 | 1.049 | thioredoxin                                                                          |
| Slr1140 | 0.903 | 0.934 | 0.982 | 1.008 | DegT/DnrJ/EryC1/StrS family protein                                                  |
| Slr1142 | 0.668 | 0.795 | 0.637 | 0.749 | hypothetical protein                                                                 |
| Slr1143 | 0.779 | 0.939 | 0.732 | 0.826 | hypothetical protein                                                                 |
| Slr1149 | 0.857 | 0.833 | 0.987 | 1.029 | ATP-binding protein of ABC transporter                                               |
| Slr1150 | 1.786 | 1.949 | 1.078 | 1.038 | unknown protein                                                                      |
| Slr1159 | 0.894 | 0.915 | 1.047 | 1.126 | glycinamide ribonucleotide synthetase                                                |
| Slr1160 | 0.872 | 0.876 | 0.606 | 0.625 | periplasmic protein, function unknown                                                |
| Slr1161 | 2.169 | 2.062 | 1.667 | 1.706 | hypothetical protein                                                                 |
| Slr1162 | 1.208 | 1.255 | 1.287 | 1.404 | unknown protein                                                                      |
| Slr1164 | 0.838 | 0.872 | 0.598 | 0.766 | ribonucleotide reductase subunit alpha                                               |
| Slr1165 | 1.110 | 1.115 | 1.225 | 1.339 | sulfate adenyltransferase                                                            |
| Slr1166 | 1.019 | 1.198 | 1.420 | 1.351 | UDP-glucose:tetrahydrobiopterin glucosyltransferase                                  |
| Slr1167 | 0.687 | 0.550 | 0.403 | 0.301 | glycerol dehydrogenase                                                               |
| Slr1171 | 1.321 | 2.725 | 0.847 | 2.179 | glutathione peroxidase-like NADPH peroxidase:glutathione peroxidase                  |
| Slr1173 | 0.708 | 0.763 | 0.791 | 0.813 | hypothetical protein                                                                 |
| Slr1176 | 1.136 | 1.364 | 1.263 | 1.639 | glucose-1-phosphate adenyltransferase                                                |
| Slr1177 | 0.847 | 0.999 | 1.067 | 1.242 | hypothetical protein                                                                 |
| Slr1179 | 0.963 | 0.867 | 1.218 | 1.190 | hypothetical protein                                                                 |
| Slr1185 | 0.442 | 0.407 | 0.507 | 0.551 | cytochrome b6-f complex alternative iron-sulfur subunit (Rieske iron sulfur protein) |
| Slr1185 | 0.442 | 0.407 | 0.507 | 0.551 | cytochrome b6-f complex alternative iron-sulfur subunit (Rieske iron sulfur protein) |
| Slr1188 | 0.800 | 1.004 | 0.706 | 0.883 | hypothetical protein                                                                 |
| Slr1189 | 0.781 | 0.743 | 0.907 | 0.793 | unknown protein                                                                      |

|         |       |       |       |       |                                                                                       |
|---------|-------|-------|-------|-------|---------------------------------------------------------------------------------------|
| Slr1192 | 1.000 | 0.863 | 0.800 | 0.659 | probable alcohol dehydrogenase                                                        |
| Slr1194 | 0.657 | 0.617 | 0.919 | 0.818 | hypothetical protein                                                                  |
| Slr1195 | 1.022 | 1.290 | 0.944 | 1.513 | hypothetical protein                                                                  |
| Slr1196 | 1.015 | 1.065 | 0.813 | 0.901 | periplasmic protein, function unknown                                                 |
| Slr1197 | 1.081 | 0.992 | 0.646 | 0.844 | SMF protein                                                                           |
| Slr1198 | 1.054 | 1.067 | 1.592 | 1.748 | antioxidant protein                                                                   |
| Slr1200 | 0.995 | 1.033 | 1.179 | 1.225 | urea transport system permease protein                                                |
| Slr1201 | 0.770 | 0.915 | 0.749 | 0.736 | urea transport system permease protein                                                |
| Slr1203 | 1.538 | 1.678 | 0.795 | 0.728 | hypothetical protein                                                                  |
| Slr1204 | 0.308 | 0.245 | 0.794 | 0.499 | protease                                                                              |
| Slr1205 | 1.049 | 1.131 | 1.156 | 1.081 | similar to chlorobenzene dioxygenase, ferredoxin component                            |
| Slr1206 | 1.011 | 0.948 | 0.797 | 1.274 | hypothetical protein                                                                  |
| Slr1207 | 0.812 | 0.789 | 1.218 | 1.080 | hypothetical protein                                                                  |
| Slr1208 | 0.934 | 1.095 | 0.999 | 1.110 | probable oxidoreductase                                                               |
| Slr1210 | 0.656 | 1.029 | 0.711 | 1.101 | unknown protein                                                                       |
| Slr1211 | 0.993 | 0.983 | 0.888 | 0.929 | cobalt-chelatase subunit CobN                                                         |
| Slr1214 | 0.725 | 0.471 | 0.829 | 0.532 | two-component response regulator PatA subfamily                                       |
| Slr1216 | 1.019 | 1.637 | 0.720 | 1.149 | Mg2+ transport protein                                                                |
| Slr1218 | 0.847 | 0.972 | 0.606 | 0.544 | hypothetical protein YCF39                                                            |
| Slr1219 | 0.797 | 0.543 | 0.706 | 0.509 | urease accessory protein E                                                            |
| Slr1220 | 1.157 | 1.189 | 0.840 | 0.880 | hypothetical protein                                                                  |
| Slr1223 | 0.853 | 1.125 | 0.919 | 1.076 | hypothetical protein                                                                  |
| Slr1224 | 0.832 | 0.932 | 0.918 | 1.048 | ATP-binding protein of sugar ABC transporter                                          |
| Slr1225 | 0.912 | 1.074 | 0.812 | 1.122 | serine/threonine kinase                                                               |
| Slr1226 | 0.764 | 0.825 | 0.907 | 0.924 | phosphoribosyl aminodazole succinocarboxamide synthetase                              |
| Slr1227 | 1.200 | 0.915 | 0.826 | 0.623 | chloroplastic outer envelope membrane protein homolog                                 |
| Slr1228 | 1.529 | 1.414 | 1.439 | 1.362 | peptide-chain-release factor 3                                                        |
| Slr1230 | 1.359 | 0.935 | 1.100 | 0.979 | hypothetical protein                                                                  |
| Slr1233 | 0.968 | 0.866 | 1.109 | 0.789 | succinate dehydrogenase flavoprotein subunit                                          |
| Slr1234 | 0.894 | 0.934 | 0.838 | 0.984 | protein kinase C inhibitor                                                            |
| Slr1235 | 1.222 | 1.151 | 0.966 | 1.096 | hypothetical protein                                                                  |
| Slr1236 | 0.944 | 1.233 | 0.733 | 0.891 | hypothetical protein                                                                  |
| Slr1238 | 1.056 | 1.290 | 0.976 | 1.233 | glutathione synthetase                                                                |
| Slr1239 | 1.148 | 1.038 | 1.661 | 1.414 | pyridine nucleotide transhydrogenase alpha subunit                                    |
| Slr1239 | 1.148 | 1.038 | 1.661 | 1.414 | pyridine nucleotide transhydrogenase alpha subunit                                    |
| Slr1240 | 1.241 | 1.045 | 3.049 | 3.311 | unknown protein                                                                       |
| Slr1243 | 0.916 | 1.056 | 1.587 | 1.805 | unknown protein                                                                       |
| Slr1251 | 1.103 | 1.508 | 0.917 | 1.144 | peptidyl-prolyl cis-trans isomerase                                                   |
| Slr1253 | 0.728 | 0.438 | 0.288 | 0.149 | unknown protein                                                                       |
| Slr1254 | 1.176 | 1.100 | 1.229 | 1.250 | phytoene dehydrogenase (phytoene desaturase)                                          |
| Slr1255 | 0.854 | 0.625 | 1.403 | 0.911 | phytoene synthase                                                                     |
| Slr1256 | 1.124 | 1.183 | 0.775 | 0.902 | urease gamma subunit                                                                  |
| Slr1256 | 1.124 | 1.183 | 0.775 | 0.902 | urease gamma subunit                                                                  |
| Slr1257 | 1.333 | 2.041 | 1.236 | 1.862 | unknown protein                                                                       |
| Slr1258 | 1.131 | 0.817 | 1.092 | 0.843 | unknown protein                                                                       |
| Slr1259 | 1.188 | 2.660 | 0.797 | 1.792 | hypothetical protein                                                                  |
| Slr1260 | 1.127 | 2.786 | 0.597 | 1.600 | hypothetical protein                                                                  |
| Slr1261 | 1.350 | 4.016 | 0.822 | 2.212 | hypothetical protein                                                                  |
| Slr1263 | 0.814 | 0.851 | 1.003 | 1.049 | hypothetical protein                                                                  |
| Slr1265 | 1.104 | 1.256 | 1.447 | 1.541 | RNA polymerase gamma-subunit                                                          |
| Slr1266 | 0.717 | 0.807 | 0.647 | 0.639 | hypothetical protein                                                                  |
| Slr1269 | 0.644 | 0.507 | 0.787 | 0.623 | gamma-glutamyltranspeptidase                                                          |
| Slr1270 | 1.105 | 0.915 | 0.903 | 0.701 | periplasmic protein, function unknown                                                 |
| Slr1271 | 0.676 | 0.591 | 0.633 | 0.670 | probable UDP-N-acetyl-D-mannosaminuronic acid transferase                             |
| Slr1272 | 1.130 | 0.983 | 0.746 | 0.578 | probable porin; major outer membrane protein                                          |
| Slr1273 | 0.823 | 0.726 | 0.890 | 0.758 | hypothetical protein                                                                  |
| Slr1274 | 0.752 | 0.887 | 0.611 | 0.636 | probable fimbrial assembly protein PilM, required for motility                        |
| Slr1275 | 0.698 | 0.766 | 0.358 | 0.326 | hypothetical protein                                                                  |
| Slr1276 | 0.655 | 0.886 | 0.445 | 0.505 | hypothetical protein                                                                  |
| Slr1277 | 0.898 | 0.838 | 0.639 | 0.637 | pilus assembly protein homologous to general secretion pathway protein D              |
| Slr1280 | 0.977 | 1.091 | 0.585 | 0.633 | NADH dehydrogenase subunit NdhK                                                       |
| Slr1280 | 0.977 | 1.091 | 0.585 | 0.633 | NADH dehydrogenase subunit NdhK                                                       |
| Slr1281 | 0.881 | 0.781 | 0.521 | 0.409 | NADH dehydrogenase subunit I                                                          |
| Slr1287 | 0.947 | 1.066 | 0.826 | 0.649 | hypothetical protein                                                                  |
| Slr1289 | 0.992 | 1.229 | 1.242 | 1.414 | isocitrate dehydrogenase (NADP+)                                                      |
| Slr1293 | 1.161 | 1.036 | 0.907 | 0.799 | similar to phytoene dehydrogenase                                                     |
| Slr1295 | 0.517 | 0.427 | 0.820 | 0.677 | iron transport system substrate-binding protein                                       |
| Slr1298 | 0.938 | 0.984 | 0.969 | 1.021 | unknown protein                                                                       |
| Slr1299 | 0.985 | 0.982 | 0.820 | 0.875 | UDP-glucose dehydrogenase                                                             |
| Slr1301 | 0.993 | 1.092 | 0.728 | 0.832 | hypothetical protein                                                                  |
| Slr1302 | 1.209 | 0.882 | 1.305 | 0.903 | protein involved in constitutive low affinity CO2 uptake                              |
| Slr1305 | 0.689 | 0.955 | 0.718 | 0.874 | two-component response regulator                                                      |
| Slr1306 | 0.660 | 0.608 | 0.965 | 0.877 | hypothetical protein                                                                  |
| Slr1311 | 1.067 | 1.001 | 2.165 | 1.969 | photosystem II D1 protein                                                             |
| Slr1312 | 0.778 | 1.043 | 1.081 | 1.330 | arginine decarboxylase                                                                |
| Slr1315 | 0.786 | 0.892 | 0.760 | 0.853 | hypothetical protein                                                                  |
| Slr1318 | 0.439 | 0.370 | 0.453 | 0.561 | iron(III) dicitrate transport system ATP-binding protein                              |
| Slr1322 | 1.370 | 1.395 | 1.351 | 1.456 | putative modulator of DNA gyrase; TldD                                                |
| Slr1324 | 0.965 | 1.302 | 0.929 | 1.053 | two-component hybrid sensor and regulator                                             |
| Slr1325 | 0.720 | 0.851 | 0.918 | 1.086 | GTP pyrophosphokinase                                                                 |
| Slr1329 | 0.894 | 0.796 | 0.863 | 0.815 | ATP synthase beta subunit                                                             |
| Slr1330 | 0.941 | 0.730 | 0.897 | 0.663 | ATP synthase epsilon chain of CF(1)                                                   |
| Slr1331 | 0.866 | 0.889 | 0.820 | 0.850 | periplasmic processing protease                                                       |
| Slr1334 | 1.073 | 1.066 | 1.030 | 0.996 | phosphoglucosyltransferase/phosphomannosyltransferase                                 |
| Slr1338 | 1.012 | 1.252 | 0.783 | 0.942 | hypothetical protein                                                                  |
| Slr1340 | 0.968 | 1.004 | 0.923 | 0.976 | unknown protein                                                                       |
| Slr1342 | 0.741 | 0.818 | 0.691 | 0.824 | hypothetical protein                                                                  |
| Slr1343 | 0.576 | 0.705 | 0.572 | 0.481 | hypothetical protein                                                                  |
| Slr1347 | 0.731 | 0.835 | 0.945 | 0.907 | beta-type carbonic anhydrase localized in the carboxysome                             |
| Slr1348 | 0.656 | 0.577 | 0.664 | 0.559 | serine acetyltransferase                                                              |
| Slr1349 | 1.050 | 1.214 | 0.989 | 1.179 | glucose-6-phosphate isomerase                                                         |
| Slr1351 | 1.181 | 0.967 | 1.012 | 0.865 | UDP-N-acetylmuramoylalanine-D-glutamyl-2,6-diaminopimelate--D-alanyl-D-alanine ligase |
| Slr1353 | 1.271 | 2.119 | 1.357 | 2.033 | hypothetical protein                                                                  |
| Slr1356 | 1.025 | 0.875 | 1.024 | 0.915 | 30S ribosomal protein S1                                                              |
| Slr1362 | 1.272 | 1.010 | 1.042 | 0.863 | hypothetical protein                                                                  |
| Slr1363 | 1.026 | 1.117 | 1.427 | 2.024 | hypothetical protein                                                                  |
| Slr1364 | 0.952 | 0.928 | 1.181 | 1.460 | biotin synthetase                                                                     |
| Slr1367 | 1.319 | 1.701 | 1.570 | 1.912 | glycogen phosphorylase                                                                |
| Slr1367 | 1.319 | 1.701 | 1.570 | 1.912 | glycogen phosphorylase                                                                |
| Slr1368 | 0.955 | 0.848 | 0.920 | 0.789 | precorrin decarboxylase                                                               |
| Slr1377 | 0.745 | 0.613 | 0.684 | 0.483 | leader peptidase I (signal peptidase I)                                               |
| Slr1378 | 0.907 | 1.397 | 0.499 | 0.797 | hypothetical protein                                                                  |
| Slr1379 | 1.190 | 1.724 | 0.786 | 1.034 | quinol oxidase subunit I                                                              |
| Slr1384 | 1.057 | 1.230 | 1.309 | 1.504 | hypothetical protein                                                                  |
| Slr1385 | 0.818 | 0.990 | 0.758 | 0.808 | unknown protein                                                                       |
| Slr1390 | 0.923 | 1.048 | 0.763 | 0.873 | cell division protein FisH                                                            |
| Slr1391 | 1.302 | 2.020 | 2.151 | 3.077 | unknown protein                                                                       |
| Slr1392 | 0.423 | 0.520 | 0.475 | 0.576 | ferrous iron transport protein B                                                      |
| Slr1393 | 0.698 | 0.622 | 1.241 | 0.992 | phytochrome-like protein, two-component sensor histidine kinase                       |
| Slr1395 | 0.620 | 0.775 | 0.650 | 0.811 | hypothetical protein                                                                  |
| Slr1397 | 0.929 | 1.134 | 0.929 | 1.053 | unknown protein                                                                       |
| Slr1398 | 0.901 | 1.016 | 0.808 | 0.936 | unknown protein                                                                       |
| Slr1403 | 0.736 | 1.366 | 0.172 | 0.258 | unknown protein                                                                       |
| Slr1406 | 0.659 | 0.905 | 0.445 | 0.588 | periplasmic protein, function unknown                                                 |
| Slr1407 | 0.521 | 0.571 | 0.393 | 0.438 | unknown protein                                                                       |
| Slr1409 | 0.661 | 0.913 | 0.537 | 0.608 | periplasmic WD-repeat protein                                                         |
| Slr1410 | 0.536 | 0.673 | 0.504 | 0.561 | periplasmic WD-repeat protein                                                         |
| Slr1411 | 0.756 | 1.021 | 0.686 | 0.833 | hypothetical protein                                                                  |
| Slr1413 | 0.940 | 0.980 | 0.621 | 0.635 | hypothetical protein                                                                  |
| Slr1414 | 0.797 | 0.870 | 0.822 | 1.047 | two-component sensor histidine kinase                                                 |
| Slr1416 | 0.840 | 0.805 | 0.708 | 0.649 | similar to MorR protein                                                               |
| Slr1417 | 0.900 | 0.632 | 0.376 | 0.254 | hypothetical protein YCF57                                                            |
| Slr1418 | 0.996 | 1.101 | 1.175 | 1.401 | dihydroorotate dehydrogenase                                                          |
| Slr1419 | 1.103 | 1.161 | 1.133 | 1.096 | hypothetical protein                                                                  |

|         |       |       |       |       |                                                                                                                     |
|---------|-------|-------|-------|-------|---------------------------------------------------------------------------------------------------------------------|
| Slr1420 | 0.720 | 0.892 | 0.674 | 0.894 | probable sugar kinase                                                                                               |
| Slr1423 | 0.763 | 0.767 | 1.264 | 1.389 | UDP-N-acetylmuramate-alanine ligase                                                                                 |
| Slr1424 | 0.664 | 0.694 | 1.009 | 1.125 | UDP-N-acetylenolpyruvoylglucosamine reductase                                                                       |
| Slr1424 | 0.664 | 0.694 | 1.009 | 1.125 | UDP-N-acetylenolpyruvoylglucosamine reductase                                                                       |
| Slr1425 | 0.731 | 0.789 | 0.675 | 0.571 | hypothetical protein                                                                                                |
| Slr1426 | 0.796 | 1.050 | 0.633 | 0.937 | recombination protein RecK                                                                                          |
| Slr1428 | 0.892 | 0.903 | 0.783 | 0.633 | hypothetical protein                                                                                                |
| Slr1431 | 0.415 | 0.489 | 0.779 | 0.905 | hypothetical protein                                                                                                |
| Slr1434 | 1.600 | 1.095 | 2.375 | 1.603 | pyridine nucleotide transhydrogenase beta subunit                                                                   |
| Slr1434 | 1.600 | 1.095 | 2.375 | 1.603 | pyridine nucleotide transhydrogenase beta subunit                                                                   |
| Slr1435 | 1.330 | 1.403 | 1.484 | 1.555 | PmbA protein homolog                                                                                                |
| Slr1436 | 1.264 | 1.339 | 1.312 | 1.515 | unknown protein                                                                                                     |
| Slr1437 | 0.889 | 0.620 | 0.990 | 0.762 | unknown protein                                                                                                     |
| Slr1438 | 0.672 | 0.622 | 0.990 | 0.808 | hypothetical protein                                                                                                |
| Slr1444 | 0.832 | 1.071 | 0.894 | 1.339 | hypothetical protein                                                                                                |
| Slr1448 | 1.035 | 1.116 | 0.992 | 1.295 | fructokinase                                                                                                        |
| Slr1452 | 6.410 | 1.645 | 5.952 | 1.709 | sulfate transport system substrate-binding protein                                                                  |
| Slr1455 | 2.882 | 1.152 | 3.135 | 1.304 | sulfate transport system ATP-binding protein                                                                        |
| Slr1459 | 0.987 | 0.940 | 0.894 | 0.808 | phycobilisome core component                                                                                        |
| Slr1462 | 0.934 | 1.279 | 1.017 | 1.342 | hypothetical protein                                                                                                |
| Slr1463 | 1.189 | 1.227 | 1.292 | 1.235 | elongation factor EF-G                                                                                              |
| Slr1464 | 0.871 | 0.986 | 0.658 | 0.736 | hypothetical protein                                                                                                |
| Slr1467 | 0.664 | 0.740 | 0.668 | 0.652 | precorrin isomerase                                                                                                 |
| Slr1468 | 0.844 | 0.864 | 0.663 | 0.767 | hypothetical protein                                                                                                |
| Slr1470 | 1.284 | 1.125 | 1.610 | 1.427 | hypothetical protein                                                                                                |
| Slr1471 | 1.163 | 1.196 | 1.192 | 1.289 | hypothetical protein                                                                                                |
| Slr1472 | 0.887 | 0.375 | 0.852 | 0.406 | hypothetical protein                                                                                                |
| Slr1476 | 1.028 | 1.152 | 0.881 | 0.893 | aspartate carbamoyltransferase                                                                                      |
| Slr1485 | 1.351 | 0.964 | 0.972 | 0.870 | putative phosphatidylinositol phosphate kinase, salt-induced periplasmic protein                                    |
| Slr1498 | 1.080 | 1.026 | 0.703 | 0.699 | putative hydrogenase expression/formation protein HypD                                                              |
| Slr1501 | 1.179 | 1.285 | 1.045 | 0.983 | probable acetyltransferase                                                                                          |
| Slr1503 | 0.853 | 1.025 | 0.755 | 0.897 | hypothetical protein                                                                                                |
| Slr1505 | 0.534 | 0.422 | 0.579 | 0.440 | unknown protein                                                                                                     |
| Slr1506 | 0.734 | 0.832 | 0.602 | 0.672 | hypothetical protein                                                                                                |
| Slr1507 | 1.127 | 1.067 | 1.550 | 1.316 | hypothetical protein                                                                                                |
| Slr1508 | 0.778 | 0.962 | 1.024 | 1.312 | probable glycosyltransferase                                                                                        |
| Slr1510 | 1.026 | 0.909 | 1.122 | 1.064 | fatty acid/phospholipid synthesis protein PlsX                                                                      |
| Slr1511 | 0.910 | 1.318 | 0.994 | 1.464 | 3-oxoacyl-[acyl-carrier-protein] synthase III                                                                       |
| Slr1512 | 0.540 | 0.355 | 0.255 | 0.180 | sodium-dependent bicarbonate transporter                                                                            |
| Slr1513 | 0.705 | 0.614 | 0.298 | 0.226 | periplasmic protein, function unknown                                                                               |
| Slr1516 | 0.798 | 0.589 | 0.985 | 0.723 | superoxide dismutase                                                                                                |
| Slr1517 | 1.089 | 0.845 | 0.879 | 0.556 | 3-isopropylmalate dehydrogenase                                                                                     |
| Slr1519 | 1.013 | 1.253 | 0.756 | 0.869 | hypothetical protein                                                                                                |
| Slr1521 | 1.202 | 1.560 | 1.490 | 1.770 | GTP-binding protein                                                                                                 |
| Slr1529 | 0.786 | 0.815 | 1.214 | 1.133 | nitrogen assimilation regulatory protein                                                                            |
| Slr1531 | 1.033 | 1.242 | 1.590 | 1.733 | signal recognition particle protein                                                                                 |
| Slr1533 | 1.203 | 1.815 | 1.600 | 2.088 | hypothetical protein                                                                                                |
| Slr1534 | 1.004 | 1.052 | 1.224 | 1.255 | hypothetical protein                                                                                                |
| Slr1535 | 1.087 | 3.676 | 1.431 | 2.681 | hypothetical protein                                                                                                |
| Slr1537 | 0.813 | 0.833 | 0.776 | 0.858 | unknown protein                                                                                                     |
| Slr1540 | 1.014 | 0.970 | 1.109 | 1.131 | mRNA-binding protein                                                                                                |
| Slr1541 | 1.136 | 0.946 | 0.880 | 0.797 | hypothetical protein                                                                                                |
| Slr1542 | 0.892 | 0.835 | 0.923 | 0.720 | 2-C-methyl-D-erythritol 2,4-cyclodiphosphate synthase                                                               |
| Slr1544 | 1.799 | 1.066 | 1.096 | 0.642 | unknown protein                                                                                                     |
| Slr1545 | 1.353 | 1.285 | 1.629 | 1.527 | RNA polymerase ECF-type (group 3) sigma-E factor                                                                    |
| Slr1549 | 1.167 | 1.055 | 0.744 | 0.645 | polypeptide deformylase                                                                                             |
| Slr1550 | 0.903 | 0.936 | 0.902 | 1.078 | lysyl-tRNA synthetase                                                                                               |
| Slr1552 | 0.559 | 0.499 | 0.510 | 0.415 | unknown protein                                                                                                     |
| Slr1556 | 0.535 | 0.847 | 0.743 | 1.161 | 2-hydroxyacid dehydrogenase homolog                                                                                 |
| Slr1557 | 0.952 | 0.972 | 1.595 | 1.541 | hypothetical protein                                                                                                |
| Slr1559 | 0.748 | 0.878 | 0.600 | 0.700 | shikimate 5-dehydrogenase                                                                                           |
| Slr1560 | 0.847 | 0.724 | 0.810 | 0.692 | histidyl tRNA synthetase                                                                                            |
| Slr1562 | 0.697 | 0.615 | 0.648 | 0.605 | glutaredoxin                                                                                                        |
| Slr1564 | 1.199 | 0.898 | 1.100 | 1.010 | group 3 RNA polymerase sigma factor                                                                                 |
| Slr1565 | 0.920 | 0.784 | 1.513 | 1.117 | hypothetical protein                                                                                                |
| Slr1566 | 0.813 | 1.046 | 1.984 | 2.188 | hypothetical protein                                                                                                |
| Slr1567 | 0.732 | 0.732 | 0.462 | 0.487 | unknown protein                                                                                                     |
| Slr1572 | 0.467 | 0.611 | 0.444 | 0.573 | hypothetical protein                                                                                                |
| Slr1573 | 0.943 | 1.196 | 0.782 | 0.935 | hypothetical protein                                                                                                |
| Slr1575 | 0.655 | 0.495 | 0.573 | 0.427 | probable potassium efflux system                                                                                    |
| Slr1577 | 0.824 | 1.143 | 0.574 | 0.747 | hypothetical protein                                                                                                |
| Slr1579 | 0.863 | 0.866 | 1.151 | 1.297 | hypothetical protein                                                                                                |
| Slr1583 | 1.052 | 0.623 | 0.466 | 0.273 | hypothetical protein                                                                                                |
| Slr1584 | 0.945 | 1.337 | 1.043 | 1.458 | two-component transcription regulator OmpR subfamily                                                                |
| Slr1588 | 0.656 | 0.167 | 0.797 | 0.247 | two-component transcription regulator                                                                               |
| Slr1590 | 1.053 | 1.109 | 1.295 | 1.229 | hypothetical protein                                                                                                |
| Slr1596 | 0.879 | 0.772 | 1.441 | 1.199 | a protein in the cytoplasmic membrane involved in light-induced proton extrusion.                                   |
| Slr1597 | 0.835 | 0.890 | 0.955 | 1.159 | chromosome partitioning ATPase, ParA family                                                                         |
| Slr1598 | 1.808 | 0.966 | 1.026 | 0.541 | lipic acid synthetase                                                                                               |
| Slr1600 | 1.065 | 1.342 | 0.937 | 1.236 | hypothetical protein                                                                                                |
| Slr1603 | 1.124 | 1.142 | 0.810 | 0.976 | hypothetical protein                                                                                                |
| Slr1604 | 1.060 | 1.015 | 1.181 | 1.163 | cell division protein FtsH                                                                                          |
| Slr1608 | 1.534 | 1.639 | 2.092 | 1.669 | putative glucose dehydrogenase-B, periplasmic protein                                                               |
| Slr1609 | 0.992 | 0.942 | 0.985 | 0.835 | long-chain-fatty-acid CoA ligase                                                                                    |
| Slr1610 | 0.520 | 0.502 | 0.461 | 0.447 | putative C-3 methyl transferase                                                                                     |
| Slr1612 | 0.696 | 1.721 | 0.348 | 0.661 | hypothetical protein                                                                                                |
| Slr1613 | 0.725 | 1.035 | 0.363 | 0.446 | hypothetical protein                                                                                                |
| Slr1615 | 0.897 | 1.071 | 0.545 | 0.739 | perosamine synthetase                                                                                               |
| Slr1616 | 0.691 | 0.924 | 0.630 | 0.885 | unknown protein                                                                                                     |
| Slr1617 | 1.037 | 1.139 | 1.464 | 1.712 | similar to UDP-glucose 4-epimerase                                                                                  |
| Slr1618 | 0.707 | 0.720 | 0.923 | 0.967 | unknown protein                                                                                                     |
| Slr1619 | 1.015 | 1.215 | 0.947 | 1.156 | hypothetical protein                                                                                                |
| Slr1622 | 0.908 | 0.662 | 0.879 | 0.615 | soluble inorganic pyrophosphatase                                                                                   |
| Slr1622 | 0.908 | 0.662 | 0.879 | 0.615 | soluble inorganic pyrophosphatase                                                                                   |
| Slr1623 | 1.125 | 1.067 | 0.742 | 0.631 | hypothetical protein                                                                                                |
| Slr1624 | 0.908 | 0.975 | 0.944 | 0.929 | hypothetical protein                                                                                                |
| Slr1626 | 0.969 | 0.708 | 0.560 | 0.449 | dihydroneopterin aldolase                                                                                           |
| Slr1629 | 0.706 | 1.052 | 1.109 | 1.661 | ribosomal large subunit pseudouridine synthase D                                                                    |
| Slr1639 | 2.415 | 2.262 | 2.347 | 2.169 | SsrA-binding protein                                                                                                |
| Slr1641 | 1.196 | 1.362 | 0.372 | 0.375 | ClpB protein                                                                                                        |
| Slr1643 | 1.078 | 0.877 | 1.225 | 0.983 | ferredoxin-NADP oxidoreductase                                                                                      |
| Slr1644 | 0.978 | 0.890 | 1.437 | 1.252 | hypothetical protein                                                                                                |
| Slr1645 | 0.956 | 1.134 | 1.302 | 1.468 | photosystem II 11 kD protein                                                                                        |
| Slr1646 | 1.372 | 1.318 | 1.080 | 1.821 | ribonuclease III                                                                                                    |
| Slr1648 | 1.135 | 1.420 | 0.929 | 1.167 | hypothetical protein                                                                                                |
| Slr1649 | 1.255 | 1.140 | 1.238 | 1.017 | hypothetical protein                                                                                                |
| Slr1653 | 0.737 | 1.065 | 0.790 | 0.943 | N-acyl-L-amino acid amidohydrolase                                                                                  |
| Slr1655 | 1.091 | 1.105 | 1.241 | 1.374 | photosystem I subunit XI                                                                                            |
| Slr1656 | 1.112 | 0.923 | 1.730 | 1.416 | UDP-N-acetylglucosamine-N-acetylmuramyl-(pentapeptide) pyrophosphoryl -undecaprenol N-acetylglucosamine transferase |
| Slr1657 | 0.930 | 0.858 | 0.703 | 0.641 | hypothetical protein                                                                                                |
| Slr1658 | 0.928 | 1.241 | 0.663 | 0.958 | unknown protein                                                                                                     |
| Slr1659 | 1.129 | 1.105 | 0.557 | 0.596 | hypothetical protein                                                                                                |
| Slr1661 | 1.082 | 0.760 | 0.661 | 0.513 | hypothetical protein                                                                                                |
| Slr1665 | 0.642 | 0.753 | 1.115 | 1.282 | diaminopimelate epimerase                                                                                           |
| Slr1666 | 1.035 | 1.011 | 0.930 | 0.985 | pleiotropic regulatory protein homolog                                                                              |
| Slr1668 | 0.627 | 0.704 | 0.919 | 1.122 | periplasmic protein, function unknown (target gene of sycrp1)                                                       |
| Slr1670 | 2.294 | 2.506 | 1.600 | 1.721 | unknown protein                                                                                                     |
| Slr1672 | 1.206 | 1.587 | 1.063 | 1.565 | glycerol kinase                                                                                                     |
| Slr1673 | 1.742 | 2.146 | 0.736 | 0.769 | probable tRNA/rRNA methyltransferase                                                                                |
| Slr1674 | 1.425 | 1.186 | 0.568 | 0.467 | hypothetical protein                                                                                                |
| Slr1677 | 0.849 | 1.637 | 0.827 | 1.374 | hypothetical protein                                                                                                |
| Slr1678 | 1.055 | 1.412 | 1.393 | 1.783 | 50S ribosomal protein L21                                                                                           |
| Slr1679 | 1.129 | 0.843 | 0.922 | 0.762 | hypothetical protein                                                                                                |
| Slr1681 | 0.499 | 0.607 | 0.603 | 0.680 | unknown protein                                                                                                     |



|         |       |       |       |       |                                                                                                      |
|---------|-------|-------|-------|-------|------------------------------------------------------------------------------------------------------|
| Slr1686 | 0.677 | 0.787 | 0.502 | 0.569 | hypothetical protein                                                                                 |
| Slr1687 | 1.675 | 1.229 | 1.235 | 0.741 | hypothetical protein                                                                                 |
| Slr1689 | 0.915 | 1.391 | 1.031 | 1.517 | formamidopyrimidine-DNA glycosylase                                                                  |
| Slr1690 | 1.208 | 2.049 | 0.611 | 1.399 | hypothetical protein                                                                                 |
| Slr1691 | 0.716 | 0.803 | 0.878 | 0.993 | glutamine-dependent NAD(+) synthetase                                                                |
| Slr1692 | 0.878 | 1.018 | 0.986 | 1.335 | hypothetical protein                                                                                 |
| Slr1693 | 0.825 | 0.879 | 0.943 | 1.012 | two-component response regulator PatA subfamily                                                      |
| Slr1693 | 0.825 | 0.879 | 0.943 | 1.012 | two-component response regulator PatA subfamily                                                      |
| Slr1694 | 0.709 | 0.855 | 0.818 | 0.880 | expression activator appA homolog                                                                    |
| Slr1697 | 1.007 | 0.978 | 1.695 | 2.000 | serine/threonine kinase                                                                              |
| Slr1699 | 1.124 | 1.091 | 0.971 | 0.931 | hypothetical protein                                                                                 |
| Slr1702 | 0.891 | 0.898 | 0.895 | 0.787 | hypothetical protein                                                                                 |
| Slr1703 | 0.855 | 0.980 | 1.033 | 1.199 | seryl-tRNA synthetase                                                                                |
| Slr1704 | 1.647 | 0.838 | 1.055 | 0.481 | hypothetical protein                                                                                 |
| Slr1706 | 0.950 | 1.374 | 0.637 | 0.908 | dihydroflavonol 4-reductase                                                                          |
| Slr1712 | 0.625 | 0.931 | 0.519 | 0.345 | hypothetical protein                                                                                 |
| Slr1717 | 1.114 | 1.531 | 0.714 | 1.088 | hypothetical protein                                                                                 |
| Slr1718 | 0.943 | 0.991 | 0.989 | 1.093 | hypothetical protein                                                                                 |
| Slr1719 | 0.840 | 0.852 | 0.710 | 0.765 | DrgA protein homolog                                                                                 |
| Slr1720 | 0.986 | 1.148 | 0.822 | 0.935 | aspartyl-tRNA synthetase                                                                             |
| Slr1721 | 0.955 | 0.915 | 0.766 | 0.821 | hypothetical protein                                                                                 |
| Slr1722 | 0.897 | 0.813 | 0.977 | 0.877 | inosine-5'-monophosphate dehydrogenase                                                               |
| Slr1723 | 1.103 | 0.844 | 0.660 | 0.550 | permease protein of sugar ABC transporter                                                            |
| Slr1724 | 0.735 | 0.754 | 0.822 | 1.008 | hypothetical protein                                                                                 |
| Slr1727 | 1.083 | 1.441 | 0.691 | 1.026 | Na <sup>+</sup> /H <sup>+</sup> antiporter                                                           |
| Slr1728 | 3.289 | 2.088 | 2.564 | 1.667 | potassium-transporting P-type ATPase A chain                                                         |
| Slr1729 | 3.745 | 3.021 | 2.959 | 2.625 | potassium-transporting P-type ATPase B chain                                                         |
| Slr1730 | 1.739 | 1.698 | 1.919 | 1.626 | potassium-transporting P-type ATPase C chain                                                         |
| Slr1731 | 2.967 | 3.003 | 1.786 | 1.786 | potassium-transporting P-type ATPase D chain                                                         |
| Slr1732 | 1.289 | 1.269 | 2.315 | 2.273 | hypothetical protein                                                                                 |
| Slr1734 | 0.988 | 1.087 | 0.891 | 1.030 | glucose 6-phosphate dehydrogenase assembly protein                                                   |
| Slr1735 | 1.041 | 1.218 | 1.418 | 1.678 | ATP-binding subunit of the ABC-type Bgt permease for basic amino acids and glutamine                 |
| Slr1739 | 1.862 | 2.045 | 1.082 | 1.151 | photosystem II 13 kDa protein homolog                                                                |
| Slr1740 | 1.121 | 1.256 | 0.978 | 1.034 | oligopeptide binding protein of ABC transporter                                                      |
| Slr1742 | 0.935 | 1.056 | 1.020 | 1.198 | probable cobryic acid synthase                                                                       |
| Slr1743 | 1.163 | 1.529 | 0.750 | 1.133 | type 2 NADH dehydrogenase NdbB                                                                       |
| Slr1743 | 1.163 | 1.529 | 0.750 | 1.133 | type 2 NADH dehydrogenase NdbB                                                                       |
| Slr1744 | 1.096 | 1.157 | 1.453 | 1.504 | N-acetylmuramoyl-L-alanine amidase, periplasmic protein                                              |
| Slr1748 | 0.664 | 1.151 | 1.351 | 1.199 | probable phosphoglycerate mutase                                                                     |
| Slr1751 | 0.685 | 0.822 | 0.855 | 0.948 | periplasmic carboxyl-terminal protease                                                               |
| Slr1752 | 0.887 | 0.766 | 0.584 | 0.506 | hypothetical protein                                                                                 |
| Slr1753 | 0.990 | 0.739 | 0.705 | 0.622 | hypothetical protein                                                                                 |
| Slr1755 | 1.091 | 1.590 | 0.943 | 1.098 | NAD <sup>+</sup> dependent glycerol-3-phosphate dehydrogenase                                        |
| Slr1756 | 0.995 | 0.987 | 1.214 | 1.138 | glutamate--ammonia ligase                                                                            |
| Slr1756 | 0.995 | 0.987 | 1.214 | 1.138 | glutamate--ammonia ligase                                                                            |
| Slr1761 | 0.910 | 1.101 | 0.829 | 0.983 | FKBP-type peptidyl-prolyl cis-trans isomerase, periplasmic protein                                   |
| Slr1762 | 0.943 | 1.011 | 0.807 | 0.926 | hypothetical protein                                                                                 |
| Slr1763 | 1.190 | 1.242 | 1.404 | 1.294 | probable methyltransferase                                                                           |
| Slr1768 | 0.644 | 0.675 | 0.643 | 0.591 | unknown protein                                                                                      |
| Slr1772 | 1.727 | 1.642 | 1.645 | 1.484 | probable hydrolase, periplasmic protein                                                              |
| Slr1773 | 0.911 | 0.990 | 0.664 | 0.643 | unknown protein                                                                                      |
| Slr1777 | 1.502 | 1.580 | 1.603 | 1.592 | magnesium protoporphyrin IX chelatase subunit D                                                      |
| Slr1779 | 0.856 | 1.088 | 0.601 | 0.703 | pyridoxal phosphate biosynthetic protein PdxJ                                                        |
| Slr1780 | 0.911 | 1.174 | 1.038 | 1.056 | hypothetical protein YCF54                                                                           |
| Slr1783 | 0.988 | 0.977 | 1.038 | 0.894 | two-component response regulator NarL subfamily                                                      |
| Slr1784 | 1.063 | 0.990 | 0.945 | 1.114 | biliverdin reductase                                                                                 |
| Slr1790 | 1.477 | 1.515 | 1.447 | 1.299 | hypothetical protein                                                                                 |
| Slr1791 | 0.873 | 0.894 | 0.947 | 1.038 | phosphoadenosine phosphosulfate reductase                                                            |
| Slr1793 | 1.330 | 1.504 | 1.295 | 1.399 | transaldolase                                                                                        |
| Slr1794 | 1.232 | 1.218 | 0.911 | 0.894 | probable anion transporting ATPase                                                                   |
| Slr1795 | 0.806 | 0.799 | 1.366 | 1.238 | peptide methionine sulfoxide reductase                                                               |
| Slr1796 | 0.967 | 0.963 | 1.110 | 1.091 | hypothetical protein                                                                                 |
| Slr1799 | 0.903 | 1.151 | 1.033 | 1.284 | hypothetical protein                                                                                 |
| Slr1800 | 0.983 | 1.125 | 0.710 | 1.005 | hypothetical protein                                                                                 |
| Slr1805 | 1.678 | 1.161 | 0.761 | 0.520 | two-component sensor histidine kinase                                                                |
| Slr1808 | 0.928 | 1.026 | 0.824 | 1.144 | transfer RNA-Gln reductase                                                                           |
| Slr1809 | 0.723 | 0.974 | 0.464 | 0.704 | unknown protein                                                                                      |
| Slr1811 | 1.267 | 1.704 | 1.189 | 1.357 | hypothetical protein                                                                                 |
| Slr1814 | 1.715 | 2.500 | 1.105 | 1.348 | hypothetical protein                                                                                 |
| Slr1815 | 0.979 | 1.024 | 1.055 | 0.909 | hypothetical protein                                                                                 |
| Slr1816 | 0.702 | 0.747 | 0.867 | 0.820 | hypothetical protein                                                                                 |
| Slr1818 | 1.105 | 1.195 | 0.935 | 1.049 | hypothetical protein                                                                                 |
| Slr1819 | 0.983 | 0.999 | 0.806 | 0.682 | hypothetical protein                                                                                 |
| Slr1821 | 1.172 | 1.350 | 0.772 | 0.956 | hypothetical protein                                                                                 |
| Slr1822 | 0.791 | 1.538 | 0.991 | 1.401 | endonuclease III                                                                                     |
| Slr1826 | 0.986 | 0.690 | 1.182 | 0.656 | hypothetical protein                                                                                 |
| Slr1828 | 1.250 | 1.495 | 1.681 | 1.988 | ferredoxin, petF-like protein                                                                        |
| Slr1829 | 0.890 | 1.727 | 1.001 | 1.869 | putative poly(3-hydroxyalkanoate) synthase component                                                 |
| Slr1830 | 0.912 | 0.847 | 1.018 | 1.202 | poly(3-hydroxyalkanoate) synthase                                                                    |
| Slr1834 | 1.255 | 1.217 | 1.410 | 1.248 | P700 apoprotein subunit Ia                                                                           |
| Slr1835 | 1.104 | 0.758 | 1.727 | 1.148 | P700 apoprotein subunit Ib                                                                           |
| Slr1837 | 0.502 | 0.556 | 0.505 | 0.533 | two-component system response regulator OmpR subfamily                                               |
| Slr1838 | 0.896 | 0.756 | 0.753 | 0.656 | carbon dioxide concentrating mechanism protein CcmK homolog 3, putative carboxysome assembly protein |
| Slr1839 | 0.670 | 0.788 | 0.577 | 0.630 | carbon dioxide concentrating mechanism protein CcmK homolog 4, putative carboxysome assembly protein |
| Slr1840 | 1.040 | 1.100 | 0.858 | 0.895 | hypothetical protein                                                                                 |
| Slr1841 | 1.114 | 1.109 | 0.825 | 0.782 | probable porin; major outer membrane protein                                                         |
| Slr1842 | 0.899 | 1.087 | 0.601 | 0.712 | cysteine synthase                                                                                    |
| Slr1843 | 0.828 | 0.999 | 0.957 | 1.319 | glucose 6-phosphate dehydrogenase                                                                    |
| Slr1844 | 1.016 | 1.414 | 1.136 | 1.379 | excinuclease ABC subunit A                                                                           |
| Slr1846 | 1.608 | 1.217 | 0.695 | 0.512 | hypothetical protein YCF64                                                                           |
| Slr1847 | 1.074 | 0.693 | 0.942 | 0.829 | hypothetical protein                                                                                 |
| Slr1848 | 0.978 | 1.193 | 1.021 | 1.148 | histidinol dehydrogenase                                                                             |
| Slr1848 | 0.978 | 1.193 | 1.021 | 1.148 | histidinol dehydrogenase                                                                             |
| Slr1852 | 0.674 | 0.988 | 0.628 | 0.886 | unknown protein                                                                                      |
| Slr1853 | 0.701 | 1.083 | 0.556 | 0.818 | carboxymuconolactone decarboxylase                                                                   |
| Slr1854 | 0.689 | 0.953 | 1.058 | 1.344 | unknown protein                                                                                      |
| Slr1855 | 0.629 | 0.781 | 0.526 | 0.668 | unknown protein                                                                                      |
| Slr1856 | 0.625 | 0.953 | 0.693 | 0.937 | phosphoprotein substrate of icfG gene cluster                                                        |
| Slr1857 | 0.528 | 0.672 | 0.627 | 0.658 | isoamylase                                                                                           |
| Slr1859 | 0.587 | 0.801 | 0.460 | 0.693 | anti-sigma f factor antagonist                                                                       |
| Slr1860 | 0.903 | 1.206 | 0.556 | 0.815 | carbon metabolisms regulatory protein lcfG                                                           |
| Slr1861 | 0.871 | 0.963 | 0.586 | 0.655 | probable sigma regulatory factor                                                                     |
| Slr1865 | 1.248 | 1.332 | 0.857 | 1.058 | unknown protein                                                                                      |
| Slr1867 | 0.939 | 0.876 | 0.794 | 0.765 | anthranilate phosphoribosyltransferase                                                               |
| Slr1870 | 0.778 | 0.810 | 0.689 | 1.832 | hypothetical protein                                                                                 |
| Slr1874 | 0.745 | 1.001 | 0.799 | 0.977 | D-alanine--D-alanine ligase                                                                          |
| Slr1875 | 1.209 | 0.833 | 0.978 | 0.936 | hypothetical protein                                                                                 |
| Slr1877 | 0.903 | 1.053 | 0.789 | 0.914 | 2-hydroxyhepta-2,4-diene-1,7-dioate isomerase                                                        |
| Slr1878 | 1.073 | 1.225 | 1.160 | 1.147 | phycocyanin alpha-subunit phycocyanobilin lyase                                                      |
| Slr1878 | 1.073 | 1.225 | 1.160 | 1.147 | phycocyanin alpha-subunit phycocyanobilin lyase                                                      |
| Slr1879 | 1.060 | 1.318 | 0.916 | 1.124 | precorrin-2 methyltransferase                                                                        |
| Slr1880 | 0.829 | 1.351 | 0.896 | 1.441 | hypothetical protein                                                                                 |
| Slr1881 | 1.055 | 1.125 | 0.868 | 0.869 | ATP-binding subunit of the ABC-type Nat permease for neutral amino acids                             |
| Slr1882 | 1.200 | 1.140 | 0.746 | 0.839 | riboflavin biosynthesis protein RibF                                                                 |
| Slr1884 | 0.918 | 0.962 | 0.784 | 0.797 | tryptophanyl-tRNA synthetase                                                                         |
| Slr1885 | 0.671 | 0.572 | 0.489 | 0.437 | hypothetical protein                                                                                 |
| Slr1887 | 1.076 | 1.032 | 1.314 | 1.238 | porphobilinogen deaminase (hydroxymethylbilan synthase, preuroporphyrinogen synthase)                |
| Slr1888 | 0.479 | 0.803 | 0.565 | 0.936 | 4-hydroxybutyrate coenzyme A transferase                                                             |
| Slr1890 | 0.898 | 0.911 | 0.683 | 0.720 | bacterioferritin                                                                                     |
| Slr1890 | 0.898 | 0.911 | 0.683 | 0.720 | bacterioferritin                                                                                     |
| Slr1894 | 3.003 | 3.731 | 2.381 | 2.695 | probable DNA-binding stress protein                                                                  |
| Slr1895 | 1.094 | 1.222 | 0.753 | 0.793 | hypothetical protein                                                                                 |
| Slr1897 | 0.889 | 0.926 | 0.898 | 0.747 | periplasmic sugar-binding protein of ABC transporter                                                 |
| Slr1898 | 1.190 | 1.049 | 1.289 | 1.143 | N-acetylglutamate kinase                                                                             |

|         |       |       |       |       |                                                                                                  |
|---------|-------|-------|-------|-------|--------------------------------------------------------------------------------------------------|
| Slr1899 | 0.848 | 0.911 | 0.652 | 0.732 | urease accessory protein F                                                                       |
| Slr1900 | 0.968 | 1.122 | 0.824 | 0.898 | hypothetical protein                                                                             |
| Slr1901 | 1.131 | 1.560 | 0.999 | 1.339 | ATP-binding protein of ABC transporter                                                           |
| Slr1907 | 1.174 | 0.746 | 0.607 | 0.381 | hypothetical protein                                                                             |
| Slr1908 | 1.111 | 0.997 | 1.200 | 1.058 | probable porin; major outer membrane protein                                                     |
| Slr1909 | 0.681 | 0.654 | 0.741 | 0.709 | two-component response regulator NarL subfamily                                                  |
| Slr1911 | 1.048 | 0.917 | 0.524 | 0.452 | hypothetical protein                                                                             |
| Slr1915 | 0.781 | 0.616 | 0.604 | 0.457 | hypothetical protein                                                                             |
| Slr1916 | 0.555 | 1.779 | 0.494 | 1.340 | probable esterase                                                                                |
| Slr1919 | 1.672 | 2.268 | 0.981 | 1.582 | hypothetical protein                                                                             |
| Slr1923 | 1.285 | 0.963 | 1.342 | 1.088 | hypothetical protein                                                                             |
| Slr1924 | 1.953 | 1.555 | 1.988 | 1.645 | D-alanyl-D-alanine carboxypeptidase, periplasmic protein                                         |
| Slr1926 | 0.976 | 1.376 | 0.728 | 0.890 | hypothetical protein                                                                             |
| Slr1927 | 0.791 | 1.318 | 1.297 | 1.232 | hypothetical protein                                                                             |
| Slr1928 | 0.956 | 0.985 | 0.964 | 0.935 | type 4 pilin-like protein                                                                        |
| Slr1931 | 0.793 | 0.810 | 1.078 | 1.000 | type 4 pilin-like protein                                                                        |
| Slr1932 | 0.910 | 1.481 | 0.541 | 0.762 | unknown protein                                                                                  |
| Slr1933 | 1.239 | 1.355 | 0.772 | 0.830 | dTDP-4-dehydrohamnose 3,5-epimerase                                                              |
| Slr1934 | 0.951 | 0.784 | 1.020 | 0.836 | pyruvate dehydrogenase E1 component, alpha subunit                                               |
| Slr1938 | 1.037 | 1.408 | 1.139 | 1.395 | putative translation initiation factor EIF-2b subunit 1                                          |
| Slr1939 | 0.812 | 0.692 | 0.758 | 0.883 | unknown protein                                                                                  |
| Slr1940 | 0.909 | 0.866 | 0.907 | 0.794 | periplasmic protein, function unknown                                                            |
| Slr1942 | 0.863 | 0.918 | 0.985 | 0.974 | circadian clock protein KaiC homolog                                                             |
| Slr1943 | 0.955 | 0.593 | 0.921 | 1.082 | probable glycosyltransferase                                                                     |
| Slr1944 | 0.721 | 0.858 | 0.638 | 0.693 | periplasmic protein, function unknown                                                            |
| Slr1945 | 0.857 | 1.037 | 0.957 | 1.300 | 2,3-bisphosphoglycerate-independent phosphoglycerate mutase                                      |
| Slr1949 | 1.449 | 1.890 | 1.499 | 1.845 | hypothetical protein                                                                             |
| Slr1950 | 0.812 | 0.724 | 0.786 | 0.674 | copper-transporting P-type ATPase CtaA                                                           |
| Slr1951 | 0.582 | 0.833 | 0.454 | 0.654 | hypothetical protein                                                                             |
| Slr1958 | 0.614 | 0.714 | 0.440 | 0.436 | unknown protein                                                                                  |
| Slr1962 | 0.905 | 0.960 | 0.815 | 0.912 | probable extracellular solute-binding protein                                                    |
| Slr1963 | 1.316 | 2.304 | 0.696 | 1.274 | water-soluble carotenoid protein                                                                 |
| Slr1964 | 1.199 | 2.137 | 3.115 | 6.579 | hypothetical protein                                                                             |
| Slr1968 | 1.364 | 1.522 | 0.693 | 0.797 | unknown protein                                                                                  |
| Slr1969 | 0.663 | 0.524 | 0.740 | 0.694 | two-component sensor histidine kinase                                                            |
| Slr1970 | 0.824 | 0.838 | 0.953 | 0.743 | hypothetical protein                                                                             |
| Slr1971 | 0.942 | 1.215 | 1.105 | 1.323 | hypothetical protein                                                                             |
| Slr1972 | 0.847 | 0.875 | 1.100 | 1.085 | hypothetical protein YCF81                                                                       |
| Slr1974 | 0.840 | 0.912 | 1.664 | 1.916 | GTP binding protein                                                                              |
| Slr1975 | 0.969 | 0.990 | 0.816 | 0.904 | N-acetylglucosamine 2-epimerase                                                                  |
| Slr1977 | 0.726 | 0.767 | 0.876 | 0.936 | hypothetical protein                                                                             |
| Slr1979 | 1.111 | 0.938 | 0.833 | 0.694 | anthranilate synthase component I                                                                |
| Slr1982 | 0.604 | 0.727 | 0.587 | 0.737 | two-component response regulator CheY subfamily                                                  |
| Slr1983 | 0.824 | 1.041 | 1.062 | 1.536 | two-component hybrid sensor and regulator                                                        |
| Slr1984 | 1.080 | 1.241 | 1.227 | 1.247 | nucleic acid-binding protein, 30S ribosomal protein S1 homolog                                   |
| Slr1986 | 0.996 | 0.829 | 1.333 | 1.092 | allophycocyanin beta subunit                                                                     |
| Slr1991 | 0.814 | 0.774 | 0.681 | 0.652 | adenylate cyclase                                                                                |
| Slr1992 | 1.266 | 1.721 | 1.103 | 1.395 | glutathione peroxidase-like NADPH peroxidase                                                     |
| Slr1993 | 0.784 | 1.068 | 0.810 | 1.036 | PHA-specific beta-ketothiolase                                                                   |
| Slr1994 | 1.054 | 1.148 | 0.644 | 0.633 | PHA-specific acetoacetyl-CoA reductase                                                           |
| Slr1998 | 1.027 | 1.224 | 0.660 | 0.898 | hypothetical protein                                                                             |
| Slr2000 | 1.114 | 1.156 | 0.844 | 0.803 | hypothetical protein                                                                             |
| Slr2001 | 0.923 | 1.017 | 0.874 | 0.886 | cyanophycinase                                                                                   |
| Slr2002 | 0.864 | 0.850 | 1.209 | 1.190 | cyanophycin synthetase                                                                           |
| Slr2004 | 0.845 | 0.910 | 0.576 | 0.656 | periplasmic protein, function unknown                                                            |
| Slr2005 | 0.981 | 1.140 | 0.691 | 0.825 | periplasmic protein, function unknown                                                            |
| Slr2011 | 1.133 | 1.011 | 1.517 | 1.285 | hypothetical protein                                                                             |
| Slr2017 | 0.396 | 0.408 | 0.365 | 0.262 | type 4 pilin-like protein, essential for motility                                                |
| Slr2018 | 0.613 | 0.604 | 0.704 | 0.702 | unknown protein                                                                                  |
| Slr2019 | 1.122 | 1.247 | 1.377 | 1.927 | ATP-binding protein of ABC transporter                                                           |
| Slr2023 | 1.188 | 1.045 | 1.037 | 0.950 | malonyl coenzyme A-acyl carrier protein transacylase                                             |
| Slr2024 | 0.890 | 0.855 | 1.138 | 1.075 | two-component response regulator CheY subfamily                                                  |
| Slr2024 | 0.890 | 0.855 | 1.138 | 1.075 | two-component response regulator CheY subfamily                                                  |
| Slr2025 | 0.903 | 0.771 | 0.986 | 0.749 | hypothetical protein                                                                             |
| Slr2030 | 1.412 | 1.412 | 0.858 | 0.970 | hypothetical protein                                                                             |
| Slr2032 | 0.404 | 0.325 | 0.352 | 0.225 | hypothetical protein YCF23                                                                       |
| Slr2033 | 0.975 | 0.913 | 2.463 | 2.309 | membrane-associated rubredoxin, essential for photosystem I assembly                             |
| Slr2034 | 1.287 | 1.126 | 1.724 | 1.821 | putative homolog of plant HCF136, which is essential for stability or assembly of photosystem II |
| Slr2035 | 1.022 | 1.468 | 1.080 | 1.211 | glutamate 5-kinase                                                                               |
| Slr2041 | 1.059 | 0.977 | 1.389 | 1.471 | probable two-component response regulator                                                        |
| Slr2043 | 1.010 | 0.845 | 1.233 | 1.017 | zinc transport system substrate-binding protein                                                  |
| Slr2046 | 0.702 | 0.708 | 0.717 | 0.787 | unknown protein                                                                                  |
| Slr2047 | 1.412 | 1.381 | 1.248 | 1.418 | PhoH like protein                                                                                |
| Slr2048 | 0.792 | 1.107 | 0.830 | 0.921 | periplasmic protein, function unknown                                                            |
| Slr2049 | 1.114 | 1.475 | 1.695 | 1.949 | hypothetical protein YCF58                                                                       |
| Slr2051 | 0.990 | 0.995 | 1.284 | 1.339 | phycobilisome rod-core linker polypeptide                                                        |
| Slr2052 | 1.280 | 2.151 | 0.904 | 1.541 | hypothetical protein                                                                             |
| Slr2053 | 0.769 | 0.694 | 0.724 | 0.731 | putative hydrolase                                                                               |
| Slr2058 | 1.580 | 1.927 | 1.835 | 2.283 | DNA topoisomerase I                                                                              |
| Slr2059 | 1.387 | 2.353 | 1.086 | 1.818 | iron-sulfur cluster binding protein homolog                                                      |
| Slr2060 | 0.716 | 0.962 | 0.559 | 0.530 | hypothetical protein                                                                             |
| Slr2067 | 0.803 | 0.792 | 1.125 | 1.088 | allophycocyanin alpha subunit                                                                    |
| Slr2070 | 0.701 | 0.692 | 0.855 | 0.923 | hypothetical protein                                                                             |
| Slr2071 | 2.132 | 3.096 | 3.247 | 4.785 | unknown protein                                                                                  |
| Slr2072 | 0.948 | 1.082 | 0.814 | 0.929 | L-threonine deaminase                                                                            |
| Slr2073 | 1.225 | 1.453 | 1.353 | 1.289 | hypothetical protein YCF50                                                                       |
| Slr2074 | 0.698 | 0.751 | 0.613 | 0.737 | similar to mannose-1-phosphate guanylyltransferase                                               |
| Slr2074 | 0.698 | 0.751 | 0.613 | 0.737 | similar to mannose-1-phosphate guanylyltransferase                                               |
| Slr2074 | 0.698 | 0.751 | 0.613 | 0.737 | similar to mannose-1-phosphate guanylyltransferase                                               |
| Slr2075 | 1.095 | 1.393 | 0.572 | 0.658 | 10kD chaperonin                                                                                  |
| Slr2076 | 1.018 | 1.221 | 0.648 | 0.765 | 60kD chaperonin                                                                                  |
| Slr2079 | 1.017 | 0.960 | 0.801 | 0.778 | putative glutaminase                                                                             |
| Slr2080 | 1.120 | 1.208 | 0.616 | 0.656 | hypothetical protein                                                                             |
| Slr2081 | 0.951 | 0.715 | 0.885 | 0.663 | prephenate dehydrogenase                                                                         |
| Slr2084 | 1.000 | 1.086 | 0.661 | 0.746 | hypothetical protein                                                                             |
| Slr2087 | 1.368 | 1.344 | 1.355 | 1.261 | c-type cytochrome biogenesis protein Ccs1                                                        |
| Slr2088 | 0.884 | 0.887 | 1.159 | 1.185 | acetohydroxy acid synthase                                                                       |
| Slr2089 | 1.013 | 1.321 | 0.952 | 1.120 | squalene-hopene-cyclase                                                                          |
| Slr2094 | 1.024 | 1.229 | 0.997 | 1.199 | fructose-1,6-/sedoheptulose-1,7-bisphosphatase                                                   |
| Slr2097 | 0.797 | 0.656 | 0.993 | 0.779 | cyanoglobin                                                                                      |
| Slr2098 | 0.545 | 0.372 | 0.734 | 0.495 | two-component hybrid sensor and regulator                                                        |
| Slr2099 | 1.052 | 0.997 | 0.794 | 1.156 | two-component hybrid sensor and regulator                                                        |
| Slr2100 | 0.833 | 1.083 | 0.648 | 0.837 | two-component response regulator                                                                 |
| Slr2101 | 0.958 | 0.784 | 0.679 | 0.683 | hypothetical protein                                                                             |
| Slr2102 | 0.899 | 0.917 | 1.290 | 1.044 | cell division protein FtsY                                                                       |
| Slr2105 | 0.978 | 1.140 | 0.931 | 0.955 | hypothetical protein                                                                             |
| Slr2122 | 1.087 | 1.135 | 1.098 | 1.292 | hypothetical protein                                                                             |
| Slr2123 | 0.825 | 1.385 | 0.933 | 1.279 | similar to D-3-phosphoglycerate dehydrogenase                                                    |
| Slr2124 | 0.826 | 0.885 | 0.511 | 0.609 | 3-oxoacyl-[acyl-carrier protein] reductase                                                       |
| Slr2125 | 0.680 | 0.804 | 0.206 | 0.333 | hypothetical protein                                                                             |
| Slr2130 | 0.620 | 0.703 | 0.826 | 0.838 | 3-dehydroquinate synthase                                                                        |
| Slr2131 | 1.292 | 1.931 | 0.923 | 1.104 | RND multidrug efflux transporter                                                                 |
| Slr2132 | 0.894 | 0.791 | 0.730 | 0.637 | phosphotransacetylase                                                                            |
| Slr2136 | 0.924 | 1.089 | 0.890 | 1.085 | GepE protein homolog                                                                             |
| Slr2141 | 1.220 | 1.333 | 1.144 | 1.284 | hypothetical protein                                                                             |
| Slr2143 | 1.067 | 1.264 | 0.994 | 1.067 | L-cysteine/cystine lyase                                                                         |
| Slr2144 | 0.690 | 0.949 | 0.527 | 0.684 | periplasmic protein, function unknown                                                            |
| Sml0008 | 1.859 | 0.957 | 1.255 | 1.072 | photosystem I subunit IX                                                                         |
| Smr0005 | 1.484 | 0.850 | 1.333 | 0.754 | photosystem I subunit XII                                                                        |
| Smr0006 | 1.011 | 0.622 | 0.934 | 0.584 | cytochrome b559 b subunit                                                                        |
| Smr0010 | 3.436 | 0.331 | 1.795 | 0.168 | cytochrome b6-f complex subunit 5                                                                |
| Ssl0020 | 0.934 | 0.937 | 0.250 | 0.287 | ferredoxin I, essential for growth                                                               |
| Ssl0242 | 0.975 | 0.745 | 2.618 | 2.024 | hypothetical protein                                                                             |
| Ssl0294 | 1.224 | 1.277 | 1.536 | 1.852 | hypothetical protein                                                                             |

|         |       |       |       |       |                                                            |
|---------|-------|-------|-------|-------|------------------------------------------------------------|
| Ssl0352 | 1.284 | 1.529 | 1.008 | 1.119 | hypothetical protein                                       |
| Ssl0353 | 1.323 | 0.874 | 1.071 | 0.591 | hypothetical protein                                       |
| Ssl0461 | 1.451 | 1.271 | 1.152 | 0.644 | hypothetical protein                                       |
| Ssl0467 | 0.778 | 0.464 | 0.488 | 0.289 | unknown protein                                            |
| Ssl0483 | 0.890 | 0.866 | 0.917 | 0.626 | hypothetical protein                                       |
| Ssl0511 | 1.266 | 0.919 | 0.684 | 0.490 | hypothetical protein                                       |
| Ssl0546 | 0.917 | 1.059 | 1.475 | 1.642 | septum site-determining protein MinE                       |
| Ssl0563 | 1.082 | 0.830 | 1.742 | 1.364 | photosystem I subunit VII                                  |
| Ssl0564 | 1.016 | 0.935 | 1.206 | 1.196 | transcriptional regulator                                  |
| Ssl0707 | 0.918 | 1.192 | 0.627 | 0.708 | nitrogen regulatory protein P-II                           |
| Ssl0787 | 1.104 | 1.101 | 1.060 | 0.950 | unknown protein                                            |
| Ssl0788 | 0.826 | 1.238 | 0.859 | 1.658 | hypothetical protein                                       |
| Ssl0832 | 1.259 | 0.880 | 0.835 | 0.631 | hypothetical protein                                       |
| Ssl1426 | 1.217 | 1.010 | 1.443 | 1.058 | 50S ribosomal protein L35                                  |
| Ssl1498 | 1.263 | 0.890 | 1.229 | 0.856 | hypothetical protein                                       |
| Ssl1533 | 1.065 | 0.971 | 1.272 | 1.247 | unknown protein                                            |
| Ssl1690 | 1.672 | 1.616 | 1.414 | 1.658 | hypothetical protein                                       |
| Ssl1707 | 1.284 | 1.616 | 1.818 | 2.257 | hypothetical protein                                       |
| Ssl1784 | 1.555 | 2.513 | 2.198 | 3.704 | 30S ribosomal protein S15                                  |
| Ssl1918 | 0.920 | 1.174 | 0.419 | 0.532 | hypothetical protein                                       |
| Ssl1972 | 1.005 | 0.896 | 1.099 | 1.136 | hypothetical protein                                       |
| Ssl2009 | 0.634 | 0.581 | 0.778 | 0.687 | hypothetical protein                                       |
| Ssl2084 | 0.724 | 0.246 | 0.649 | 0.269 | acyl carrier protein                                       |
| Ssl2233 | 1.325 | 1.681 | 2.217 | 2.439 | 30S ribosomal protein S20                                  |
| Ssl2245 | 1.008 | 0.772 | 0.741 | 0.558 | unknown protein                                            |
| Ssl2296 | 1.233 | 2.222 | 0.812 | 1.295 | pterin-4 $\alpha$ -carbinolamine dehydratase               |
| Ssl2501 | 1.658 | 2.532 | 0.741 | 0.987 | unknown protein                                            |
| Ssl2595 | 1.057 | 1.152 | 1.114 | 1.252 | hypothetical protein                                       |
| Ssl2598 | 2.475 | 2.004 | 2.299 | 1.838 | photosystem II PsbH protein                                |
| Ssl2667 | 1.504 | 1.013 | 0.721 | 0.697 | an assembly factor for iron-sulfur clusters                |
| Ssl2717 | 1.284 | 1.105 | 2.331 | 1.996 | hypothetical protein                                       |
| Ssl2733 | 0.883 | 0.968 | 0.657 | 0.568 | hypothetical protein                                       |
| Ssl2781 | 0.815 | 1.099 | 0.625 | 0.800 | hypothetical protein                                       |
| Ssl2874 | 0.808 | 1.021 | 0.452 | 0.514 | hypothetical protein                                       |
| Ssl2982 | 0.815 | 0.850 | 1.277 | 1.351 | probable DNA-directed RNA polymerase omega subunit         |
| Ssl3044 | 1.385 | 1.563 | 0.763 | 0.809 | probable ferredoxin                                        |
| Ssl3093 | 0.906 | 0.882 | 1.435 | 1.290 | phycobilisome small rod linker polypeptide                 |
| Ssl3291 | 1.486 | 1.318 | 1.255 | 1.096 | hypothetical protein                                       |
| Ssl3335 | 1.401 | 1.445 | 2.740 | 2.924 | preprotein translocase SecE subunit                        |
| Ssl3364 | 1.272 | 0.583 | 0.338 | 0.146 | CP12 polypeptide                                           |
| Ssl3379 | 1.054 | 0.968 | 0.959 | 0.774 | hypothetical protein                                       |
| Ssl3432 | 0.846 | 0.875 | 1.119 | 1.148 | 30S ribosomal protein S19                                  |
| Ssl3436 | 1.040 | 0.936 | 0.935 | 0.883 | 50S ribosomal protein L29                                  |
| Ssl3437 | 0.801 | 1.272 | 1.420 | 2.137 | 30S ribosomal protein S17                                  |
| Ssl3441 | 1.269 | 1.621 | 1.862 | 2.833 | initiation factor IF-1                                     |
| Ssl3451 | 0.828 | 0.838 | 1.082 | 0.924 | hypothetical protein                                       |
| Ssl3829 | 0.781 | 0.655 | 0.868 | 0.719 | hypothetical protein                                       |
| Ssr0102 | 1.101 | 1.122 | 0.978 | 0.983 | hypothetical protein YCF40                                 |
| Ssr0330 | 1.845 | 2.717 | 1.650 | 2.294 | ferredoxin-thioredoxin reductase, variable chain           |
| Ssr0332 | 1.383 | 1.876 | 1.901 | 2.381 | hypothetical protein                                       |
| Ssr0482 | 1.458 | 1.608 | 2.410 | 2.252 | 30S ribosomal protein S16                                  |
| Ssr0657 | 1.361 | 0.999 | 1.205 | 0.819 | hypothetical protein                                       |
| Ssr0692 | 1.712 | 0.654 | 0.482 | 0.181 | hypothetical protein                                       |
| Ssr0693 | 0.298 | 0.286 | 0.395 | 0.375 | unknown protein                                            |
| Ssr1114 | 1.040 | 1.250 | 1.011 | 1.119 | hypothetical protein                                       |
| Ssr1256 | 0.898 | 0.765 | 1.408 | 1.183 | hypothetical protein                                       |
| Ssr1399 | 1.511 | 2.141 | 2.037 | 2.639 | 30S ribosomal protein S18                                  |
| Ssr1407 | 1.038 | 0.695 | 0.997 | 0.659 | hypothetical protein                                       |
| Ssr1425 | 0.878 | 0.970 | 0.715 | 0.781 | hypothetical protein YCF34                                 |
| Ssr1480 | 0.816 | 0.663 | 1.312 | 0.923 | putative RNA-binding protein                               |
| Ssr1528 | 0.759 | 0.633 | 0.538 | 0.617 | hypothetical protein                                       |
| Ssr1600 | 0.921 | 1.255 | 0.650 | 0.881 | similar to anti-sigma f factor antagonist                  |
| Ssr1604 | 1.445 | 1.795 | 1.672 | 2.053 | 50S ribosomal protein L28                                  |
| Ssr1765 | 2.208 | 3.185 | 1.957 | 2.114 | hypothetical protein                                       |
| Ssr1789 | 2.506 | 1.946 | 2.632 | 2.066 | CAB/ELIP/HLIP-related protein HliD                         |
| Ssr1853 | 1.092 | 1.335 | 1.218 | 1.272 | unknown protein                                            |
| Ssr1951 | 0.945 | 1.531 | 0.803 | 0.657 | hypothetical protein                                       |
| Ssr2047 | 1.522 | 1.151 | 1.093 | 0.816 | hypothetical protein                                       |
| Ssr2049 | 1.294 | 1.724 | 1.054 | 1.377 | unknown protein                                            |
| Ssr2061 | 1.406 | 1.698 | 1.060 | 1.178 | glutaredoxin                                               |
| Ssr2067 | 1.490 | 0.543 | 1.305 | 0.469 | hypothetical protein                                       |
| Ssr2201 | 0.811 | 0.653 | 0.576 | 0.654 | unknown protein                                            |
| Ssr2406 | 2.304 | 2.950 | 0.760 | 0.959 | unknown protein                                            |
| Ssr2422 | 0.922 | 1.577 | 0.493 | 0.772 | unknown protein                                            |
| Ssr2554 | 1.142 | 1.527 | 1.397 | 1.799 | hypothetical protein                                       |
| Ssr2799 | 1.570 | 2.364 | 1.757 | 1.887 | 50S ribosomal protein L27                                  |
| Ssr2831 | 1.048 | 1.037 | 1.684 | 1.541 | photosystem I subunit IV                                   |
| Ssr2857 | 0.955 | 1.307 | 1.374 | 1.590 | mercuric transport protein periplasmic component precursor |
| Ssr2998 | 1.222 | 1.109 | 1.050 | 1.138 | hypothetical protein                                       |
| Ssr3000 | 1.147 | 1.131 | 1.124 | 1.095 | hypothetical protein                                       |
| Ssr3122 | 0.983 | 1.033 | 0.947 | 0.951 | hypothetical protein                                       |
| Ssr3188 | 1.062 | 0.953 |       |       | hypothetical protein                                       |
| Ssr3304 | 0.725 | 0.494 | 0.873 | 0.520 | hypothetical protein                                       |
| Ssr3341 | 0.956 | 1.004 | 0.511 | 0.551 | hypothetical protein                                       |
| Ssr3383 | 1.495 | 1.621 | 2.882 | 3.460 | phycobilisome small core linker polypeptide                |
| Ssr3402 | 1.107 | 1.071 | 1.704 | 1.372 | unknown protein                                            |
| Ssr3451 | 1.233 | 1.181 | 0.938 | 0.923 | cytochrome b559 alpha subunit                              |
| Ssr3532 | 0.966 | 0.852 | 1.309 | 2.000 | unknown protein                                            |

**Supplementary Table S3: Proteins up-regulated in the *Δslr1588* mutant upon salt exposure.**

| Protein ID | Slr1588-r1 vs. Control-r1 |                   | Slr1588-r2 vs. Control-r1 |                   | Slr1588-r1 vs. Control-r2 |                   | Slr1588-r2 vs. Control-r2 |                   | Description                                                                |
|------------|---------------------------|-------------------|---------------------------|-------------------|---------------------------|-------------------|---------------------------|-------------------|----------------------------------------------------------------------------|
|            | Ratio                     | Sequence coverage |                                                                            |
| Slr1027    |                           |                   | 2.85                      | 54.30             |                           |                   |                           |                   | NADH-dependent glutamate synthase small subunit                            |
| Slr0394    |                           |                   |                           |                   | 2.00                      | 52.20             |                           |                   | phosphoglycerate kinase                                                    |
| Slr0260    |                           |                   |                           |                   |                           |                   | 2.19                      | 21.30             | cob(I)alamin adenosyltransferase                                           |
| Slr0502    |                           |                   |                           |                   |                           |                   | 2.34                      | 26.70             | cobalamin synthesis protein cobW homolog                                   |
| Slr1483    | 3.94                      | 17.80             | 3.04                      | 17.80             | 12.82                     | 17.80             | 9.35                      | 17.80             | periplasmic protein, similar to transforming growth factor induced protein |
| Slr1566    |                           |                   |                           |                   | 3.40                      | 34.30             | 2.39                      | 34.30             | glucosylglycerolphosphate synthase                                         |
| Slr0319    | 2.19                      | 24.00             |                           |                   |                           |                   |                           |                   | beta-lactamase                                                             |
| Slr0746    |                           |                   | 3.37                      | 15.40             |                           |                   |                           |                   | glucosylglycerolphosphate phosphatase                                      |
| Slr1894    |                           |                   | 2.38                      | 66.00             | 3.73                      | 66.00             |                           |                   | probable DNA-binding stress protein                                        |
| Slr0045    |                           |                   |                           |                   | 3.77                      | 4.60              |                           |                   | sucrose phosphate synthase                                                 |
| Slr0963    |                           |                   | 2.16                      | 50.70             |                           |                   | 2.46                      | 50.70             | ferredoxin-sulfite reductase                                               |
| Slr1608    |                           |                   | 2.09                      | 13.30             |                           |                   |                           |                   | putative glucose dehydrogenase-B, periplasmic protein                      |
| Slr0629    |                           |                   | 3.15                      | 7.80              |                           |                   | 2.56                      | 7.80              | alternative photosystem I reaction center subunit X                        |
| Slr1085    |                           |                   | 2.17                      | 32.60             | 3.89                      | 32.60             | 2.54                      | 32.60             | glycerol-3-phosphate dehydrogenase                                         |
| Slr1091    |                           |                   | 2.56                      | 43.70             |                           |                   | 2.36                      | 43.70             | geranylgeranyl hydrogenase                                                 |
| Slr1214    |                           |                   | 2.51                      | 36.90             |                           |                   | 2.40                      | 36.90             | Magnesium-protoporphyrin IX monomethyl ester [oxidative] cyclase 1;        |
| Slr0171    |                           |                   | 2.71                      | 34.90             |                           |                   |                           |                   | photosystem I assembly related protein Ycf37                               |
| Slr0343    |                           |                   | 2.47                      | 14.40             |                           |                   |                           |                   | cytochrome b6-f complex subunit 4                                          |
| Slr0506    |                           |                   |                           |                   |                           |                   | 2.12                      | 52.80             | light-dependent NADPH-protochlorophyllide oxidoreductase                   |
| Slr0772    |                           |                   |                           |                   |                           |                   | 2.07                      | 14.20             | light-independent protochlorophyllide reductase subunit ChlB               |
| Slr1311    |                           |                   | 2.16                      | 18.30             |                           |                   |                           |                   | photosystem II D1 protein                                                  |
| Slr1434    |                           |                   | 2.38                      | 8.80              |                           |                   |                           |                   | pyridine nucleotide transhydrogenase beta subunit                          |
| Slr1739    |                           |                   |                           |                   | 2.04                      | 37.70             |                           |                   | photosystem II 13 kDa protein homolog                                      |
| Slr2033    |                           |                   | 2.46                      | 27.00             |                           |                   | 2.31                      | 27.00             | membrane-associated rubredoxin, essential for photosystem I assembly       |
| Smr0010    | 3.44                      | 18.40             |                           |                   |                           |                   |                           |                   | cytochrome b6-f complex subunit 5                                          |
| Ss12598    | 2.48                      | 16.10             |                           |                   | 2.00                      | 16.10             |                           |                   | photosystem II PsbH protein                                                |
| Ssr0330    |                           |                   |                           |                   | 2.72                      | 17.30             |                           |                   | ferredoxin-thioredoxin reductase, variable chain                           |
| Slr0157    |                           |                   |                           |                   | 2.31                      | 35.70             | 2.42                      | 35.70             | hypothetical protein                                                       |
| Slr0325    |                           |                   |                           |                   | 2.06                      | 16.30             |                           |                   | hypothetical protein                                                       |
| Slr0723    |                           |                   |                           |                   | 2.45                      | 28.30             | 2.66                      | 28.30             | hypothetical protein                                                       |
| Slr0982    |                           |                   |                           |                   | 2.07                      | 82.00             |                           |                   | hypothetical protein                                                       |
| Slr1541    |                           |                   |                           |                   | 2.20                      | 15.70             | 2.21                      | 15.70             | hypothetical protein                                                       |
| Slr1652    |                           |                   |                           |                   |                           |                   | 3.72                      | 12.10             | hypothetical protein                                                       |
| Slr1739    |                           |                   |                           |                   |                           |                   | 2.34                      | 7.20              | hypothetical protein                                                       |
| Slr1862    |                           |                   | 2.67                      | 25.70             |                           |                   |                           |                   | hypothetical protein                                                       |
| Slr1863    | 6.76                      | 57.00             |                           |                   | 3.42                      | 57.00             |                           |                   | hypothetical protein                                                       |
| Slr1873    |                           |                   |                           |                   | 2.83                      | 18.10             | 2.76                      | 66.10             | hypothetical protein                                                       |
| Slr1884    |                           |                   |                           |                   |                           |                   |                           |                   | hypothetical protein                                                       |
| Slr0147    |                           |                   | 3.22                      | 20.50             |                           |                   |                           |                   | hypothetical protein                                                       |
| Slr0664    |                           |                   |                           |                   | 2.31                      | 9.90              | 3.16                      | 9.90              | hypothetical protein                                                       |
| Slr0765    |                           |                   |                           |                   | 2.86                      | 20.10             |                           |                   | hypothetical protein                                                       |
| Slr0876    |                           |                   | 2.24                      | 46.90             |                           |                   |                           |                   | hypothetical protein                                                       |
| Slr0962    | 2.01                      | 11.30             |                           |                   |                           |                   |                           |                   | hypothetical protein                                                       |
| Slr1161    |                           |                   |                           |                   | 2.06                      | 46.20             |                           |                   | hypothetical protein                                                       |
| Slr1240    |                           |                   | 3.05                      | 13.40             |                           |                   | 3.31                      | 13.40             | hypothetical protein                                                       |
| Slr1259    |                           |                   |                           |                   | 2.66                      | 44.80             |                           |                   | hypothetical protein                                                       |
| Slr1353    |                           |                   |                           |                   | 2.12                      | 9.90              | 2.03                      | 9.90              | hypothetical protein                                                       |
| Slr1391    |                           |                   | 2.15                      | 22.40             | 2.02                      | 22.40             |                           |                   | hypothetical protein                                                       |
| Slr1535    |                           |                   |                           |                   | 3.68                      | 11.50             | 2.68                      | 11.50             | hypothetical protein                                                       |
| Slr1732    |                           |                   | 2.31                      | 48.30             |                           |                   | 2.27                      | 48.30             | hypothetical protein                                                       |
| Slr2071    | 2.13                      | 19.60             |                           |                   | 3.10                      | 19.60             |                           |                   | hypothetical protein                                                       |
| Ss10242    |                           |                   |                           |                   |                           |                   | 2.02                      | 28.90             | hypothetical protein                                                       |
| Ss12501    |                           |                   |                           |                   | 2.53                      | 36.00             |                           |                   | hypothetical protein                                                       |
| Ss12717    |                           |                   | 2.33                      | 43.60             |                           |                   | 2.00                      | 43.60             | hypothetical protein                                                       |
| Ssr3532    |                           |                   |                           |                   |                           |                   | 2.00                      | 30.00             | hypothetical protein                                                       |
| Slr0064    | 2.18                      | 18.00             |                           |                   |                           |                   |                           |                   | putative polar amino acid transport system substrate-binding protein       |
| Slr0361    |                           |                   |                           |                   | 2.11                      | 10.30             |                           |                   | hypothetical protein                                                       |
| Slr1866    |                           |                   |                           |                   |                           |                   | 2.12                      | 31.70             | hypothetical protein                                                       |
| Slr1891    |                           |                   |                           |                   | 2.23                      | 42.90             | 3.38                      | 42.90             | hypothetical protein                                                       |
| Slr0001    |                           |                   |                           |                   |                           |                   | 2.24                      | 48.80             | hypothetical protein                                                       |
| Slr0144    |                           |                   | 2.28                      | 11.50             |                           |                   |                           |                   | hypothetical protein                                                       |
| Slr0688    |                           |                   |                           |                   |                           |                   | 2.20                      | 8.20              | hypothetical protein                                                       |
| Slr1257    |                           |                   |                           |                   | 2.04                      | 17.40             |                           |                   | hypothetical proteins                                                      |
| Slr1261    |                           |                   |                           |                   | 4.02                      | 44.70             | 2.21                      | 44.70             | hypothetical protein                                                       |
| Slr1363    |                           |                   |                           |                   |                           |                   | 2.02                      | 34.60             | hypothetical protein                                                       |
| Ss11707    |                           |                   |                           |                   |                           |                   | 2.26                      | 26.20             | Hypothetical proteins                                                      |
| Ssr1765    | 2.21                      | 44.00             |                           |                   | 3.18                      | 44.00             |                           |                   | Hypothetical proteins                                                      |
| Slr0021    |                           |                   |                           |                   |                           |                   | 2.28                      | 13.50             | protease                                                                   |
| Slr0708    |                           |                   |                           |                   |                           |                   | 2.16                      | 9.20              | dimethyladenosine transferase                                              |
| Slr1101    |                           |                   | 2.44                      | 42.90             |                           |                   | 3.04                      | 42.90             | 30S ribosomal protein S10                                                  |
| Slr1740    |                           |                   | 2.79                      | 41.70             |                           |                   | 3.01                      | 41.70             | 50S ribosomal protein L19                                                  |
| Slr1799    |                           |                   |                           |                   |                           |                   | 2.66                      | 60.60             | 50S ribosomal protein L3                                                   |
| Slr1800    |                           |                   | 4.59                      | 33.80             |                           |                   | 6.85                      | 33.80             | 50S ribosomal protein L4                                                   |
| Slr1803    |                           |                   | 2.68                      | 41.30             |                           |                   |                           |                   | 50S ribosomal protein L22                                                  |
| Slr1804    |                           |                   |                           |                   |                           |                   | 2.38                      | 55.00             | 30S ribosomal protein S3                                                   |
| Slr1808    |                           |                   | 3.13                      | 63.00             |                           |                   | 3.27                      | 63.00             | 50S ribosomal protein L5                                                   |
| Slr1810    |                           |                   | 2.04                      | 54.70             |                           |                   |                           |                   | 50S ribosomal protein L6                                                   |
| Slr1811    |                           |                   | 2.51                      | 54.20             |                           |                   | 3.02                      | 54.20             | 50S ribosomal protein L18                                                  |
| Slr1813    |                           |                   | 2.44                      | 76.90             |                           |                   | 3.44                      | 76.90             | 50S ribosomal protein L15                                                  |
| Slr1816    |                           |                   |                           |                   |                           |                   | 2.22                      | 54.30             | 30S ribosomal protein S13                                                  |
| Slr1822    |                           |                   | 2.37                      | 61.30             |                           |                   | 3.08                      | 61.30             | 30S ribosomal protein S9                                                   |
| Slr0628    |                           |                   | 2.11                      | 19.00             | 2.38                      | 19.00             | 2.90                      | 19.00             | 30S ribosomal protein S14                                                  |
| Slr0744    |                           |                   |                           |                   |                           |                   | 2.06                      | 26.20             | translation initiation factor IF-2                                         |
| Slr0974    |                           |                   |                           |                   |                           |                   | 2.82                      | 47.50             | initiation factor IF-3                                                     |
| Ss11784    |                           |                   | 2.20                      | 25.80             | 2.51                      | 25.80             | 3.70                      | 25.80             | 30S ribosomal protein S15                                                  |
| Ss12233    |                           |                   | 2.22                      | 41.20             |                           |                   | 2.44                      | 41.20             | 30S ribosomal protein S20                                                  |
| Ss13437    |                           |                   |                           |                   |                           |                   | 2.14                      | 30.10             | 30S ribosomal protein S17                                                  |
| Ss13441    |                           |                   |                           |                   |                           |                   | 2.83                      | 37.30             | initiation factor IF-1                                                     |
| Ssr0482    |                           |                   | 2.41                      | 59.80             |                           |                   | 2.25                      | 59.80             | 30S ribosomal protein S16                                                  |
| Ssr1399    |                           |                   | 2.04                      | 43.70             |                           |                   | 2.64                      | 43.70             | 30S ribosomal protein S18                                                  |
| Ssr2799    |                           |                   |                           |                   | 2.36                      | 46.00             |                           |                   | 50S ribosomal protein L27                                                  |
| Slr1443    |                           |                   | 2.17                      | 33.90             |                           |                   | 2.02                      | 33.90             | CTP synthetase                                                             |
| Slr0185    |                           |                   |                           |                   | 2.34                      | 18.00             |                           |                   | orotate phosphoribosyltransferase                                          |
| Slr0537    |                           |                   |                           |                   |                           |                   | 2.11                      | 46.80             | putative sugar kinase                                                      |
| Slr0083    |                           |                   | 2.06                      | 35.20             |                           |                   |                           |                   | RNA helicase Light                                                         |
| Slr0080    |                           |                   | 2.12                      | 38.20             |                           |                   |                           |                   | ribonuclease H                                                             |
| Slr0653    |                           |                   | 2.24                      | 27.30             |                           |                   | 2.60                      | 27.30             | principal RNA polymerase sigma factor SigA                                 |
| Slr0005    |                           |                   |                           |                   | 2.25                      | 16.30             |                           |                   | ABC1-like                                                                  |
| Slr1598    | 2.86                      | 14.80             |                           |                   |                           |                   |                           |                   | Mn transporter MntC                                                        |

|         |      |       |      |       |  |      |       |       |                                                    |                                                                      |
|---------|------|-------|------|-------|--|------|-------|-------|----------------------------------------------------|----------------------------------------------------------------------|
| Slr0376 |      |       |      |       |  |      | 2.97  | 55.20 | hypothetical protein                               |                                                                      |
| Slr1105 |      |       |      |       |  |      | 2.21  | 37.30 | GTP-binding protein TypA/BipA homolog              |                                                                      |
| Slr1452 | 6.41 | 39.80 | 5.95 | 39.80 |  |      |       |       | sulfate transport system substrate-binding protein |                                                                      |
| Slr1455 | 2.88 | 14.60 | 3.13 | 14.60 |  |      |       |       | sulfate transport system ATP-binding protein       |                                                                      |
| Slr1919 |      |       |      |       |  | 2.27 | 16.80 |       | ABC1-like                                          |                                                                      |
| Slr0199 |      |       | 2.27 | 57.90 |  |      |       | 2.42  | 57.90                                              | plastocyanin                                                         |
| Slr0541 |      |       | 2.58 | 2.80  |  |      |       |       |                                                    | acyl-lipid desaturase (delta 9)                                      |
| Slr1143 |      |       |      |       |  |      |       | 2.42  | 25.50                                              | ATP-dependent helicase PerA                                          |
| Slr1150 |      |       | 2.40 | 4.40  |  |      |       |       |                                                    | putative receptor-associated protein-related                         |
| Slr1171 |      |       |      |       |  | 2.72 | 85.20 |       |                                                    | glutathione peroxidase-like NADPH peroxidase, glutathione peroxidase |
| Slr1728 | 3.29 | 6.80  | 2.56 | 6.80  |  | 2.09 | 6.80  |       |                                                    | potassium-transporting P-type ATPase A chain                         |
| Slr1729 |      |       | 2.96 | 35.20 |  |      |       |       |                                                    | potassium-transporting P-type ATPase B chain                         |
| Ssl2296 |      |       |      |       |  |      |       | 2.22  | 77.10                                              | pterin-4a-carbinolamine dehydratase                                  |
| Ssr1789 | 2.51 | 43.90 |      |       |  |      |       |       |                                                    | CAB/ELIP/HLIP-related protein HliD                                   |

**Supplementary Table S4: Proteins down-regulated in the *Δslr1588* mutant upon salt exposure.**

| Protein ID | Slr1588-r1 vs. Control-r1 |                   | Slr1588-r2 vs. Control-r1 |                   | Slr1588-r1 vs. Control-r2 |                   | Slr1588-r2 vs. Control-r2 |                   | Description                                                        |
|------------|---------------------------|-------------------|---------------------------|-------------------|---------------------------|-------------------|---------------------------|-------------------|--------------------------------------------------------------------|
|            | Ratio                     | Sequence coverage |                                                                    |
| Slr1760    |                           |                   |                           |                   | -2.51                     | 21.90             | -3.38                     | 21.90             | homoserine kinase                                                  |
| Slr1626    |                           |                   |                           |                   |                           |                   | -2.23                     | 24.00             | dihydroneopterin aldolase                                          |
| Slr1231    |                           |                   | -3.44                     | 9.80              |                           |                   | -2.07                     | 9.80              | mannosyltransferase                                                |
| Slr1306    |                           |                   |                           |                   |                           |                   | -2.16                     | 54.90             | periplasmic protein, function unknown                              |
| Slr1533    |                           |                   |                           |                   | -2.18                     | 51.40             |                           |                   | twitching mobility protein                                         |
| Slr1550    |                           |                   |                           |                   |                           |                   | -2.33                     | 16.20             | probable porin; major outer membrane protein                       |
| Slr0042    |                           |                   | -2.00                     | 23.10             |                           |                   |                           |                   | probable porin; major outer membrane protein                       |
| Slr0804    | -2.80                     | 21.00             |                           |                   | -2.88                     | 21.00             |                           |                   | probable D-alanyl-D-alanine carboxypeptidase                       |
| Slr0993    | -2.38                     | 10.20             |                           |                   | -3.30                     | 10.20             |                           |                   | putative peptidase                                                 |
| Slr1063    |                           |                   |                           |                   |                           |                   | -2.32                     | 5.40              | probable glycosyltransferase                                       |
| Slr1293    | -2.03                     | 19.40             | -3.84                     | 19.40             | -2.16                     | 19.40             | -3.29                     | 19.40             | chemotaxis protein CheW                                            |
| Slr0945    |                           |                   | -7.66                     | 25.80             |                           |                   |                           |                   | arsenical resistance protein ArsH homolog                          |
| Slr0946    |                           |                   | -3.07                     | 11.50             |                           |                   | -3.25                     | 11.50             | arsenate reductase                                                 |
| Slr2017    | -2.53                     | 3.80              |                           |                   | -2.45                     | 3.80              |                           |                   | type 4 pilin-like protein, essential for motility                  |
| Slr1432    | -2.36                     | 14.70             |                           |                   |                           |                   |                           |                   | putative hydrogenase expression/formation protein HypB             |
| Slr0596    |                           |                   |                           |                   |                           |                   | -2.31                     | 24.50             | creatinine amidohydrolase                                          |
| Slr1167    |                           |                   | -2.48                     | 13.50             |                           |                   | -3.32                     | 13.50             | glycerol dehydrogenase                                             |
| Slr0247    |                           |                   |                           |                   |                           |                   | -14.55                    | 5.30              | iron-stress chlorophyll-binding protein, homologous to psbC (CP43) |
| Slr0248    | -2.76                     | 22.90             | -3.22                     | 22.90             | -4.81                     | 22.90             | -5.89                     | 22.90             | flavodoxin                                                         |
| Slr0521    |                           |                   |                           |                   |                           |                   | -2.29                     | 12.10             | NADH dehydrogenase subunit 6                                       |
| Slr0685    | -2.45                     | 27.20             |                           |                   | -2.02                     | 27.20             |                           |                   | thioredoxin-m, putative                                            |
| Slr1322    |                           |                   |                           |                   | -3.27                     | 12.00             | -3.55                     | 12.00             | ATP synthase A chain of CF0                                        |
| Slr1732    |                           |                   | -13.56                    | 3.00              |                           |                   |                           |                   | NADH dehydrogenase subunit 5                                       |
| Slr1796    |                           |                   |                           |                   | -2.84                     | 14.60             |                           |                   | cytochrome c553                                                    |
| Slr0331    |                           |                   | -2.02                     | 5.00              |                           |                   |                           |                   | NADH dehydrogenase subunit 4                                       |
| Slr0897    |                           |                   | -2.95                     | 9.90              |                           |                   | -2.02                     | 9.90              | endo-1,4-beta-glucanase                                            |
| Slr1185    | -2.26                     | 22.90             |                           |                   | -2.46                     | 22.90             |                           |                   | cytochrome b6-f complex alternative iron-sulfur subunit            |
| Ssl0020    |                           |                   | -4.01                     | 47.40             |                           |                   | -3.49                     | 47.40             | ferredoxin I, essential for growth                                 |
| Ssl2084    |                           |                   |                           |                   |                           |                   | -3.72                     | 22.80             | acyl carrier protein                                               |
| Slr0088    |                           |                   |                           |                   |                           |                   | -2.69                     | 5.80              | hypothetical protein                                               |
| Slr0230    |                           |                   | -2.21                     | 24.00             |                           |                   |                           |                   | hypothetical protein                                               |
| Slr0545    | -2.46                     | 4.90              |                           |                   |                           |                   | -3.40                     | 4.90              | hypothetical protein                                               |
| Slr0572    |                           |                   |                           |                   | -2.01                     | 5.30              |                           |                   | hypothetical protein                                               |
| Slr0596    |                           |                   | -2.89                     | 23.40             |                           |                   | -2.37                     | 23.40             | hypothetical protein                                               |
| Slr1735    |                           |                   | -3.65                     | 53.40             |                           |                   | -3.45                     | 53.40             | hypothetical protein                                               |
| Slr1882    | -2.24                     | 13.90             |                           |                   | -3.17                     | 13.90             |                           |                   | hypothetical protein                                               |
| Slr1913    |                           |                   |                           |                   |                           |                   | -2.07                     | 20.40             | hypothetical protein                                               |
| Slr1946    |                           |                   | -2.21                     | 4.20              |                           |                   | -2.42                     | 4.20              | hypothetical protein                                               |
| Slr0111    | -2.51                     | 19.70             |                           |                   | -3.36                     | 19.70             |                           |                   | hypothetical protein                                               |
| Slr0146    |                           |                   |                           |                   | -2.94                     | 11.20             |                           |                   | hypothetical protein                                               |
| Slr0238    |                           |                   |                           |                   |                           |                   | -2.62                     | 17.10             | hypothetical protein                                               |
| Slr0333    | -2.11                     | 44.30             |                           |                   |                           |                   |                           |                   | hypothetical protein                                               |
| Slr0479    |                           |                   | -2.19                     | 7.50              |                           |                   |                           |                   | hypothetical protein                                               |
| Slr0667    |                           |                   | -2.45                     | 12.70             |                           |                   |                           |                   | hypothetical protein                                               |
| Slr0708    |                           |                   | -2.38                     | 44.50             |                           |                   |                           |                   | hypothetical protein                                               |
| Slr0869    |                           |                   |                           |                   | -2.28                     | 15.30             |                           |                   | hypothetical protein                                               |
| Slr1110    | -2.13                     | 26.60             |                           |                   |                           |                   |                           |                   | hypothetical protein                                               |
| Slr1127    |                           |                   | -4.52                     | 1.90              |                           |                   | -3.26                     | 1.90              | hypothetical protein                                               |
| Slr1253    |                           |                   | -3.48                     | 14.40             |                           |                   | -6.69                     | 14.40             | hypothetical protein                                               |
| Slr1275    |                           |                   | -2.79                     | 27.50             |                           |                   | -3.07                     | 27.50             | hypothetical protein                                               |
| Slr1276    |                           |                   | -2.25                     | 26.90             |                           |                   |                           |                   | hypothetical protein                                               |
| Slr1378    |                           |                   | -2.01                     | 13.50             |                           |                   |                           |                   | hypothetical protein                                               |
| Slr1403    |                           |                   | -5.80                     | 2.70              |                           |                   | -3.87                     | 2.70              | hypothetical protein                                               |
| Slr1406    |                           |                   | -2.25                     | 42.50             |                           |                   |                           |                   | hypothetical protein                                               |
| Slr1407    |                           |                   |                           |                   |                           |                   | -2.28                     | 42.90             | hypothetical protein                                               |
| Slr1505    |                           |                   |                           |                   | -2.37                     | 37.40             | -2.28                     | 37.40             | hypothetical protein                                               |
| Slr1567    |                           |                   | -2.16                     | 8.10              |                           |                   | -2.06                     | 8.10              | hypothetical protein                                               |
| Slr1681    | -2.01                     | 15.30             |                           |                   |                           |                   |                           |                   | hypothetical protein                                               |
| Slr1704    |                           |                   |                           |                   |                           |                   | -2.08                     | 22.30             | hypothetical protein                                               |
| Slr1907    |                           |                   |                           |                   |                           |                   | -2.63                     | 10.60             | hypothetical protein                                               |
| Slr1915    |                           |                   |                           |                   |                           |                   | -2.19                     | 40.90             | hypothetical protein                                               |
| Slr1958    |                           |                   | -2.27                     | 40.00             |                           |                   | -2.30                     | 40.00             | hypothetical protein                                               |
| Slr2125    |                           |                   | -4.85                     | 8.30              |                           |                   | -3.01                     | 8.30              | hypothetical protein                                               |
| Ssl0467    |                           |                   | -2.05                     | 62.00             | -2.16                     | 62.00             | -3.46                     | 62.00             | hypothetical protein                                               |
| Ssl1918    |                           |                   | -2.39                     | 50.50             |                           |                   |                           |                   | hypothetical protein                                               |
| Ssr0693    |                           |                   |                           |                   | -3.50                     | 13.70             |                           |                   | hypothetical protein                                               |
| Ssr3304    |                           |                   |                           |                   | -2.02                     | 51.70             |                           |                   | hypothetical protein                                               |
| Slr1417    |                           |                   | -2.66                     | 7.90              |                           |                   | -3.94                     | 7.90              | hypothetical protein                                               |
| Slr1472    |                           |                   |                           |                   | -2.67                     | 18.70             |                           |                   | hypothetical protein                                               |
| Slr0044    |                           |                   | -2.06                     | 32.30             | -2.41                     | 32.30             | -2.65                     | 32.30             | hypothetical protein                                               |
| Slr0068    |                           |                   |                           |                   | -2.22                     | 6.90              |                           |                   | hypothetical protein                                               |

|         |       |       |       |       |       |       |       |       |                                                                               |
|---------|-------|-------|-------|-------|-------|-------|-------|-------|-------------------------------------------------------------------------------|
| SI0072  |       |       |       |       | -2.36 | 9.30  |       |       | hypothetical protein                                                          |
| SI0253  | -2.06 | 15.60 |       |       | -3.33 | 15.60 |       |       | hypothetical protein                                                          |
| SI0445  |       |       |       |       | -2.04 | 7.70  |       |       | hypothetical protein                                                          |
| SI0508  |       |       | -3.41 | 9.60  |       |       |       |       | hypothetical protein                                                          |
| SI0588  | -2.68 | 5.20  | -2.00 | 5.20  |       |       |       |       | hypothetical protein                                                          |
| SI0630  |       |       | -2.31 | 26.20 |       |       |       |       | hypothetical protein                                                          |
| SI0788  |       |       |       |       | -5.17 | 20.90 | -3.41 | 20.90 | hypothetical protein                                                          |
| SI0827  |       |       |       |       |       |       | -4.71 | 3.40  | hypothetical protein                                                          |
| SI0846  |       |       |       |       |       |       | -5.38 | 19.00 | hypothetical protein                                                          |
| SI0872  |       |       |       |       | -2.93 | 28.00 | -3.00 | 28.00 | hypothetical protein                                                          |
| SI1060  |       |       |       |       |       |       | -2.01 | 5.20  | hypothetical protein                                                          |
| SI1072  |       |       | -2.29 | 6.70  |       |       |       |       | hypothetical protein                                                          |
| SI1239  |       |       | -2.13 | 28.10 |       |       |       |       | hypothetical protein                                                          |
| SI1350  |       |       |       |       | -2.94 | 1.50  |       |       | hypothetical protein                                                          |
| SI1660  |       |       |       |       |       |       | -2.62 | 9.00  | hypothetical protein                                                          |
| SI1697  |       |       |       |       |       |       | -2.23 | 10.00 | hypothetical protein                                                          |
| Slr0006 |       |       |       |       |       |       | -2.31 | 21.70 | hypothetical protein                                                          |
| Slr0302 |       |       |       |       |       |       | -2.22 | 3.10  | unknown protein                                                               |
| Slr0431 |       |       | -2.05 | 46.00 |       |       |       |       | hypothetical protein                                                          |
| Slr0503 |       |       |       |       |       |       | -2.81 | 11.60 | hypothetical protein YCF66                                                    |
| Slr1572 | -2.14 | 4.20  |       |       |       |       |       |       | hypothetical protein                                                          |
| Slr1674 |       |       |       |       |       |       | -2.14 | 6.90  | hypothetical protein                                                          |
| Slr1885 |       |       | -2.04 | 14.60 |       |       |       |       | hypothetical protein                                                          |
| Slr2032 | -2.47 | 34.30 | -2.84 | 34.30 | -3.07 | 34.30 | -4.44 | 34.30 | hypothetical protein                                                          |
| Ssl2874 |       |       | -2.21 | 79.80 |       |       |       |       | hypothetical protein                                                          |
| Ssl3364 |       |       |       |       |       |       | -6.87 | 43.20 | hypothetical protein                                                          |
| SI1549  | -2.61 | 31.20 |       |       | -3.71 | 31.20 |       |       | salt-enhanced periplasmic protein                                             |
| Slr1204 | -3.24 | 25.20 |       |       | -4.09 | 25.20 | -2.01 | 25.20 | protease                                                                      |
| Slr1641 |       |       |       |       |       |       | -2.66 | 55.80 | ClpB protein                                                                  |
| Slr0689 |       |       |       |       |       |       | -2.09 | 25.90 | hypothetical protein                                                          |
| SI0789  |       |       |       |       | -4.59 | 29.70 | -2.82 | 29.70 | two-component response regulator OmpR subfamily                               |
| SI0790  | -2.39 | 14.20 | -2.20 | 14.20 | -2.05 | 14.20 | -2.41 | 14.20 | two-component sensor histidine kinase                                         |
| SI1296  |       |       |       |       |       |       | -2.53 | 9.60  | two-component hybrid sensor and regulator                                     |
| SI1334  |       |       |       |       | -2.56 | 10.20 |       |       | two-component sensor histidine kinase                                         |
| SI1708  |       |       | -2.17 | 33.60 |       |       |       |       | two-component response regulator NarL subfamily                               |
| Slr0474 |       |       |       |       |       |       | -2.01 | 6.10  | two-component response regulator CheY subfamily, regulator for phytochrome 1  |
| Slr1588 |       |       |       |       | -5.99 | 7.40  | -4.04 | 7.40  | two-component transcription regulator                                         |
| SI0507  |       |       |       |       | -2.12 | 14.50 | -2.55 | 14.50 | probable cation transporter                                                   |
| SI0689  |       |       | -2.23 | 11.90 |       |       | -4.64 | 11.90 | Na <sup>+</sup> /H <sup>+</sup> antiporter                                    |
| SI1600  | -4.19 | 4.20  | -3.02 | 4.20  |       |       |       |       | manganese transport system membrane protein MntB                              |
| Slr0615 |       |       |       |       |       |       | -2.57 | 7.40  | ATP-binding protein of ABC transporter                                        |
| Slr0875 |       |       |       |       |       |       | -2.30 | 28.30 | large-conductance mechanosensitive channel                                    |
| Slr0944 |       |       |       |       | -2.75 | 1.80  |       |       | multidrug-efflux transporter                                                  |
| Slr1295 |       |       |       |       | -2.34 | 63.30 |       |       | iron transport system substrate-binding protein                               |
| Slr1392 |       |       | -2.11 | 1.80  |       |       |       |       | ferrous iron transport protein B                                              |
| Slr1512 |       |       |       |       |       |       | -5.56 | 22.70 | sodium-dependent bicarbonate transporter                                      |
| SI0037  |       |       |       |       |       |       | -3.29 | 18.80 | Sirohydrochlorin cobaltochelatase;                                            |
| SI0837  |       |       | -2.08 | 42.50 |       |       |       |       | periplasmic protein, function unknown                                         |
| SI1032  |       |       | -2.18 | 14.90 |       |       | -4.25 | 14.90 | carbon dioxide concentrating mechanism protein CcmN                           |
| SI1305  |       |       |       |       |       |       | -2.23 | 27.80 | probable hydrolase                                                            |
| SI1558  |       |       | -2.13 | 7.20  |       |       |       |       | mannose-1-phosphate guanylyltransferase                                       |
| SI1831  |       |       |       |       | -2.55 | 8.90  |       |       | glycolate oxidase subunit, (Fe-S)protein                                      |
| Slr0095 |       |       | -2.03 | 20.00 |       |       |       |       | O-methyltransferase                                                           |
| Slr0298 |       |       |       |       |       |       | -2.25 | 27.60 | FraH protein homolog                                                          |
| Slr0798 |       |       |       |       | -6.05 | 25.30 | -3.16 | 25.30 | zinc-transporting P-type ATPase (zinc efflux pump) involved in zinc tolerance |
| Slr1610 |       |       |       |       |       |       | -2.24 | 18.50 | putative C-3 methyl transferase                                               |
